# Supplementary material for: Solvent- and functional-group-assisted tautomerism of 3-alkyl substituted 5-(2-pyridyl)-1,2,4-triazoles in DMSO–water
Source: Royal Society of Chemistry journal article supplement (doi:10.1039/d3ob01651j), 2023-01-01
Supplement: d3ob01651j1.pdf [file d3ob01651j1.pdf]

## Supporting information

### Solvent- and functional-group-assisted tautomerism of 3-alkyl substituted 5-(2-pyridyl)-1,2,4-triazoles in DMSO-Water

Jesús García-López,<sup>\*a</sup> Dmytro M. Khomenko,<sup>\*b</sup> Borys V. Zakharchenko,<sup>b</sup> Roman O. Doroshchuk,<sup>b</sup>

Viktoriia S. Starova,<sup>b</sup> María José Iglesias,<sup>a</sup> Rostyslav D. Lampeka,<sup>b</sup> Fernando López-Ortiz,<sup>\*a</sup>

<sup>a</sup>Área de Química Orgánica, Research Centre CIAIMBITAL, Universidad de Almería, Carretera de Sacramento s/n, Almería, 04120, Spain.

<sup>b</sup>Department of Chemistry, Taras Shevchenko National University of Kyiv, Volodymyrska Street, 64/13, Kyiv 01601, Ukraine.

#### Contents

|                                                                                                                                                                                                                        |     |
|------------------------------------------------------------------------------------------------------------------------------------------------------------------------------------------------------------------------|-----|
| <b>Figure S1.</b> Expansions of the NH and H <sub>2</sub> O signals of the <sup>1</sup> H NMR spectra of compounds <b>9a-9h</b> with increasing amounts of H <sub>2</sub> O. ....                                      | S4  |
| <b>Figure S2.</b> Inversion-recovery measurement of <i>T</i> <sub>1</sub> for the NH and H <sub>2</sub> O signals of <b>9d</b> in DMSO- <i>d</i> <sub>6</sub> at 17 °C, ratio triazoles:H <sub>2</sub> O of 4:96. .... | S5  |
| <b>Figure S3.</b> (Top) <sup>1</sup> H- and (bottom) <sup>13</sup> C-NMR spectra of pyridinetriazol <b>9a</b> in DMSO- <i>d</i> <sub>6</sub> .....                                                                     | S6  |
| <b>Figure S4.</b> <sup>1</sup> H, <sup>15</sup> N HMQC spectrum of pyridinetriazol <b>9a</b> in DMSO- <i>d</i> <sub>6</sub> .....                                                                                      | S7  |
| <b>Figure S5.</b> (Top) <sup>1</sup> H- and (bottom) <sup>13</sup> C-NMR spectra of pyridinetriazol <b>9b</b> in DMSO- <i>d</i> <sub>6</sub> .....                                                                     | S8  |
| <b>Figure S6.</b> <sup>1</sup> H, <sup>15</sup> N HMQC spectrum of pyridinetriazol <b>9b</b> in DMSO- <i>d</i> <sub>6</sub> .....                                                                                      | S9  |
| <b>Figure S7.</b> <sup>1</sup> H EXSY spectrum of pyridinetriazol <b>9b</b> in DMSO- <i>d</i> <sub>6</sub> at 17 °C, ratio triazoles:H <sub>2</sub> O of 6:94, mixing time of 25 ms. ....                              | S9  |
| <b>Figure S8.</b> (Top) <sup>1</sup> H- and (bottom) <sup>13</sup> C-NMR spectra of pyridinetriazol <b>9c</b> in DMSO- <i>d</i> <sub>6</sub> .....                                                                     | S10 |
| <b>Figure S9.</b> <sup>1</sup> H, <sup>15</sup> N HMQC spectrum of pyridinetriazol <b>9c</b> in DMSO- <i>d</i> <sub>6</sub> .....                                                                                      | S11 |
| <b>Figure S10.</b> <sup>1</sup> H EXSY spectrum of pyridinetriazol <b>9c</b> in DMSO- <i>d</i> <sub>6</sub> at 17 °C, ratio triazoles:H <sub>2</sub> O of 94:6, mixing time of 25 ms. ....                             | S11 |
| <b>Figure S11.</b> <sup>1</sup> H EXSY spectrum of pyridinetriazol <b>9c</b> in DMSO- <i>d</i> <sub>6</sub> at 17 °C, ratio triazoles:H <sub>2</sub> O of 94:6, mixing time of 50 ms. ....                             | S12 |
| <b>Figure S12.</b> <sup>1</sup> H EXSY spectrum of pyridinetriazol <b>9c</b> in DMSO- <i>d</i> <sub>6</sub> at 17 °C, ratio triazoles:H <sub>2</sub> O of 94:6, mixing time of 100 ms. ....                            | S12 |
| <b>Figure S13.</b> <sup>1</sup> H EXSY spectrum of pyridinetriazol <b>9c</b> in DMSO- <i>d</i> <sub>6</sub> at 17 °C, ratio triazoles:H <sub>2</sub> O of 2:98, mixing time of 25 ms. ....                             | S13 |
| <b>Figure S14.</b> <sup>1</sup> H EXSY spectrum of pyridinetriazol <b>9c</b> in DMSO- <i>d</i> <sub>6</sub> at 17 °C, ratio triazoles:H <sub>2</sub> O of 2:98, mixing time of 50 ms. ....                             | S13 |

|                                                                                                                                                                                                                                                                                                        |     |
|--------------------------------------------------------------------------------------------------------------------------------------------------------------------------------------------------------------------------------------------------------------------------------------------------------|-----|
| <b>Figure S15.</b> (Top) $^1\text{H}$ - and (bottom) $^{13}\text{C}$ -NMR spectra of pyridinetriazol <b>9d</b> in $\text{DMSO-}d_6$ .....                                                                                                                                                              | S14 |
| <b>Figure S16.</b> $^1\text{H}$ , $^{15}\text{N}$ HMQC spectrum of pyridinetriazol <b>9d</b> in $\text{DMSO-}d_6$ .....                                                                                                                                                                                | S15 |
| <b>Figure S17.</b> $^1\text{H}$ EXSY spectrum of pyridinetriazol <b>9d</b> in $\text{DMSO-}d_6$ at 17 °C,<br>ratio triazoles: $\text{H}_2\text{O}$ of 4:96, mixing time of 2.6 ms.....                                                                                                                 | S15 |
| <b>Figure S18.</b> $^1\text{H}$ EXSY spectrum of pyridinetriazol <b>9d</b> in $\text{DMSO-}d_6$ at 17 °C,<br>ratio triazoles: $\text{H}_2\text{O}$ of 58:42, mixing time of 50 ms.....                                                                                                                 | S16 |
| <b>Figure S19.</b> (Top) $^1\text{H}$ - and (bottom) $^{13}\text{C}$ -NMR spectra of pyridinetriazol <b>9e</b> in $\text{DMSO-}d_6$ .....                                                                                                                                                              | S17 |
| <b>Figure S20.</b> $^1\text{H}$ , $^{15}\text{N}$ HMQC spectrum of pyridinetriazol <b>9e</b> in $\text{DMSO-}d_6$ .....                                                                                                                                                                                | S18 |
| <b>Figure S21.</b> $^1\text{H}$ EXSY spectrum of pyridinetriazol <b>9e</b> in $\text{DMSO-}d_6$ at 17 °C,<br>ratio triazoles: $\text{H}_2\text{O}$ of 93:7, mixing time of 25 ms.....                                                                                                                  | S18 |
| <b>Figure S22.</b> $^1\text{H}$ EXSY spectrum of pyridinetriazol <b>9e</b> in $\text{DMSO-}d_6$ at 17 °C,<br>ratio triazoles: $\text{H}_2\text{O}$ of 93:7, mixing time of 50 ms.....                                                                                                                  | S19 |
| <b>Figure S23.</b> $^1\text{H}$ EXSY spectrum of pyridinetriazol <b>9e</b> in $\text{DMSO-}d_6$ at 17 °C,<br>ratio triazoles: $\text{H}_2\text{O}$ of 93:7, mixing time of 100 ms.....                                                                                                                 | S19 |
| <b>Figure S24.</b> $^1\text{H}$ EXSY spectrum of pyridinetriazol <b>9e</b> in $\text{DMSO-}d_6$ at 17 °C,<br>ratio triazoles: $\text{H}_2\text{O}$ of 3:97, mixing time of 25 ms.....                                                                                                                  | S20 |
| <b>Figure S25.</b> (Top) $^1\text{H}$ - and (bottom) $^{13}\text{C}$ -NMR spectra of pyridinetriazol <b>9f</b> in $\text{DMSO-}d_6$ .....                                                                                                                                                              | S21 |
| <b>Figure S26.</b> $^1\text{H}$ , $^{15}\text{N}$ HMQC spectrum of pyridinetriazol <b>9f</b> in $\text{DMSO-}d_6$ .....                                                                                                                                                                                | S22 |
| <b>Figure S27.</b> $^1\text{H}$ EXSY spectrum of pyridinetriazol <b>9f</b> in $\text{DMSO-}d_6$ at 17 °C,<br>ratio triazoles: $\text{H}_2\text{O}$ of 13:87, mixing time of 25 ms.....                                                                                                                 | S22 |
| <b>Figure S28.</b> (Top) $^1\text{H}$ - and (bottom) $^{13}\text{C}$ -NMR spectra of pyridinetriazol <b>9g</b> in $\text{DMSO-}d_6$ .....                                                                                                                                                              | S23 |
| <b>Figure S29.</b> $^1\text{H}$ , $^{15}\text{N}$ HMQC spectrum of pyridinetriazol <b>9g</b> in $\text{DMSO-}d_6$ .....                                                                                                                                                                                | S24 |
| <b>Figure S30.</b> (Top) $^1\text{H}$ - and (bottom) $^{13}\text{C}$ -NMR spectra of pyridinetriazol <b>9h</b> in $\text{DMSO-}d_6$ .....                                                                                                                                                              | S25 |
| <b>Figure S31.</b> $^1\text{H}$ , $^{15}\text{N}$ HMQC spectrum of pyridinetriazol <b>9h</b> in $\text{DMSO-}d_6$ .....                                                                                                                                                                                | S26 |
| <b>Table S1.</b> Rates of exchange (in $\text{s}^{-1}$ ) and activation energies $\Delta G^\ddagger$ (in $\text{kcal}\cdot\text{mol}^{-1}$ ) obtained<br>from EXSY spectra for compounds <b>9b</b> , <b>9c</b> , <b>9d</b> , <b>9e</b> and <b>9f</b> in $\text{DMSO-}d_6$ at 17 °C.....                | S27 |
| <b>Figure S32.</b> Computed explicit solvation of <b>9b-B</b> in DMSO<br>[M06-2X/6-311+G(d,p)/SMD(DMSO)].....                                                                                                                                                                                          | S28 |
| <b>Figure S33.</b> Computed 1,2-proton transfer pathway of <b>9b-A</b> to <b>9b-B</b> in DMSO<br>[M06-2X/6-311+G(d,p)/SMD(DMSO)].....                                                                                                                                                                  | S28 |
| <b>Figure S34.</b> Computed 1,2-proton transfer pathway of <b>9b-A</b> · $\text{1H}_2\text{O}$ to <b>9b-B</b> · $\text{1H}_2\text{O}$ in DMSO<br>[M06-2X/6-311+G(d,p)/SMD(DMSO)].....                                                                                                                  | S28 |
| <b>Figure S35.</b> Computed 1,2-proton transfer pathway of <b>9b-A</b> · $\text{2H}_2\text{O}$ to <b>9b-B</b> · $\text{2H}_2\text{O}$ in DMSO<br>[M06-2X/6-311+G(d,p)/SMD(DMSO)].....                                                                                                                  | S29 |
| <b>Figure S36.</b> Computed 1,2-proton transfer pathway of <b>9b-A</b> · $\text{2H}_2\text{O}$ to <b>9b-B</b> · $\text{2H}_2\text{O}$ in<br>$\text{H}_2\text{O}$ [M06-2X/6-311+G(d,p)/SMD( $\text{H}_2\text{O}$ )].....                                                                                | S29 |
| <b>Figure S37.</b> Computed 1,2-proton transfer pathway <b>9b-A</b> · $\text{3H}_2\text{O}$ / <b>9b-A</b> · $\text{3H}_2\text{O}(\text{H}_2\text{O})$<br>to <b>9b-B</b> · $\text{3H}_2\text{O}$ / <b>9b-B</b> · $\text{3H}_2\text{O}(\text{H}_2\text{O})$ in DMSO [M06-2X/6-311+G(d,p)/SMD(DMSO)]..... | S30 |
| <b>Figure S38.</b> Computed 1,2-proton transfer pathway of <b>9b-A</b> · $\text{4H}_2\text{O}$ to <b>9b-B</b> · $\text{4H}_2\text{O}$ in DMSO<br>[M06-2X/6-311+G(d,p)/SMD(DMSO)].....                                                                                                                  | S30 |

|                                                                                                                                                                                                                                                                                                                                                                                                         |     |
|---------------------------------------------------------------------------------------------------------------------------------------------------------------------------------------------------------------------------------------------------------------------------------------------------------------------------------------------------------------------------------------------------------|-----|
| <b>Figure S39.</b> Computed proton transfer pathway of <b>9b-B</b> ⇌ <b>9b-C</b> in DMSO<br>[M06-2X/6-311+G(d,p)/SMD(DMSO)] .....                                                                                                                                                                                                                                                                       | S31 |
| <b>Figure S40.</b> Computed proton transfer pathway of <b>9b-B·DMSO</b> ⇌ <b>9b-C·DMSO</b> in DMSO<br>[M06-2X/6-311+G(d,p)/SMD(DMSO)] .....                                                                                                                                                                                                                                                             | S31 |
| <b>Figure S41.</b> Computed proton transfer pathway of <b>9b-B·H<sub>2</sub>O</b> ⇌ <b>9b-C·H<sub>2</sub>O</b> in DMSO<br>[M06-2X/6-311+G(d,p)/SMD(DMSO)] .....                                                                                                                                                                                                                                         | S32 |
| <b>Figure S42.</b> Computed proton transfer pathway of <b>9b-B·2H<sub>2</sub>O</b> ⇌ <b>9b-C·2H<sub>2</sub>O</b> in DMSO<br>[M06-2X/6-311+G(d,p)/SMD(DMSO)] .....                                                                                                                                                                                                                                       | S33 |
| <b>Figure S43.</b> Graphical overview of the computed proton transfer pathway of<br><b>9b-B·nS</b> ⇌ <b>9b-C·nS</b> in DMSO, S = DMSO, H <sub>2</sub> O, n = 0, 1, 2.....                                                                                                                                                                                                                               | S34 |
| <b>Figure S44.</b> Computed rotamerization of the pyridine substituent in <b>9b-A,B,C</b> and in the<br>zwitterionic intermediates <b>I1/I2</b> in DMSO [M06-2X/6-311+G(d,p)/SMD(DMSO)] .....                                                                                                                                                                                                           | S35 |
| <b>Table S2.</b> Distribution of tautomers <b>9b-A</b> , <b>9b-B</b> and <b>9b-C</b> computed at the<br>M06-2X/6-311+G(d,p)/SMD(DMSO) level.....                                                                                                                                                                                                                                                        | S36 |
| <b>Table S3.</b> Computed energy and thermodynamic parameters for the conformers of tautomer <b>9b-A</b> ,<br><b>9b-B</b> and <b>9b-C</b> and the species involved in the tautomerization <b>9b-A</b> ⇌ <b>9b-B</b> ⇌ <b>9b-C</b> at the level<br>M06-2X/6-311+G(d,p)/SMD(DMSO).....                                                                                                                    | S37 |
| <b>Table S4.</b> Computed energy and thermodynamic parameters for the conformers of tautomer <b>9b-A</b> ,<br>and <b>9b-B</b> and the species involved in the tautomerization <b>9b-A</b> ⇌ <b>9b-B</b> at the level M06-2X/6-<br>311+G(d,p)/SMD(H <sub>2</sub> O) (E = electronic energy, H = enthalpy, G = Gibbs free energy; G <sub>correct</sub> =<br>correction due to entropy, in Hartrees) ..... | S38 |
| <b>Cartesian coordinates</b> .....                                                                                                                                                                                                                                                                                                                                                                      | S39 |
| <b>Figure S45.</b> Computed <sup>15</sup> N chemical shifts of <b>9b-A</b> at the level B3LYP/6-<br>311+G(2d,p)/SMD(DMSO)/GIAO.....                                                                                                                                                                                                                                                                     | S61 |
| <b>Figure S46.</b> Computed <sup>15</sup> N chemical shifts of <b>9b-B</b> at the level B3LYP/6-311+G(2d,p)/<br>SMD(DMSO)/GIAO.....                                                                                                                                                                                                                                                                     | S61 |
| <b>Figure S47.</b> Computed <sup>15</sup> N chemical shifts of <b>9b-C</b> at the level B3LYP/6-311+G(2d,p)/<br>SMD(DMSO)/GIAO.....                                                                                                                                                                                                                                                                     | S62 |

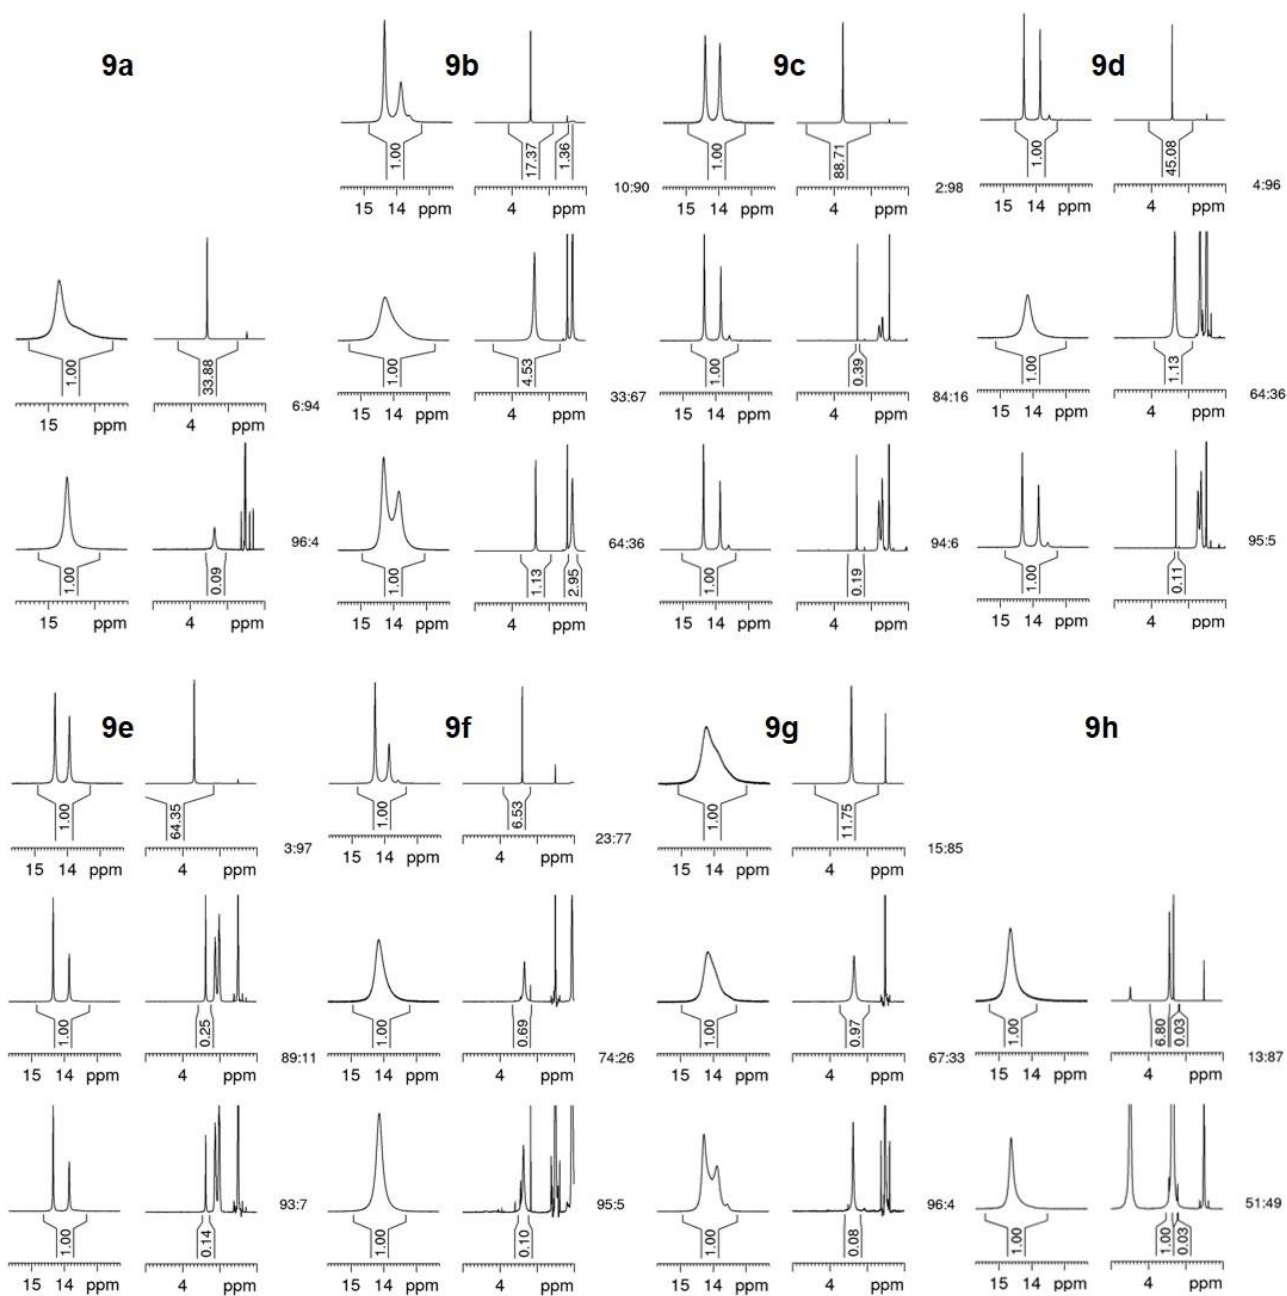

**Figure S1.** Expansions of the NH and H<sub>2</sub>O signals of the  $^1\text{H}$  NMR spectra of compounds **9a-9h** with increasing amounts of H<sub>2</sub>O (from bottom to top). The ratio **9**:H<sub>2</sub>O is indicated on the right of the NMR spectra. For **9h**, the integral of the H<sub>2</sub>O signal has been obtained by integrating half the signal and subtracting the integral of one of the OMe  $^{13}\text{C}$  satellites due to the overlap of the H<sub>2</sub>O and OMe signals.

INTENSITY fit :  $I[t]=I[0]+P*\exp(-t/T1)$

10 points for Peak 1, Peak Point at 14.378 ppm

$I[0] = 9.713e-001$ ;  $P = -1.915e+000$ ;  $T1 = 790.788$  ms; SD = 3.452e-002

| tau      | ppm    | integral     | intensity    |
|----------|--------|--------------|--------------|
| 10.000m  | 14.378 | -1.1314e+007 | -1.4254e+006 |
| 100.000m | 14.378 | -9.5841e+006 | -1.2153e+006 |
| 250.000m | 14.378 | -5.9609e+006 | -7.7034e+005 |
| 500.000m | 14.376 | 3.9622e+005  | 6752.8       |
| 1.000s   | 14.378 | 6.5521e+006  | 7.3668e+005  |
| 2.000s   | 14.378 | 1.106e+007   | 1.2579e+006  |
| 3.000s   | 14.378 | 1.2946e+007  | 1.4597e+006  |
| 4.000s   | 14.378 | 1.3816e+007  | 1.5483e+006  |
| 5.000s   | 14.378 | 1.4274e+007  | 1.5885e+006  |
| 10.000s  | 14.378 | 1.4981e+007  | 1.6182e+006  |

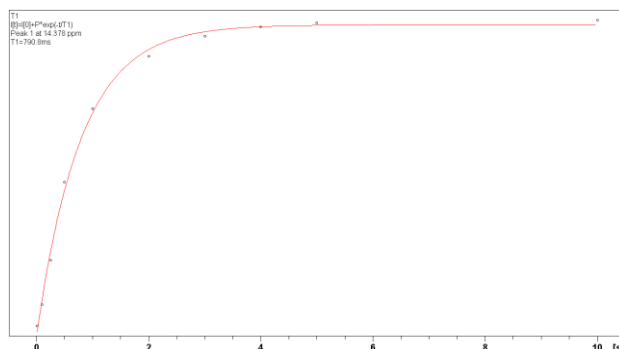

10 points for Peak 2, Peak Point at 13.885 ppm

$I[0] = 9.701e-001$ ;  $P = -1.904e+000$ ;  $T1 = 783.595$  ms; SD = 3.269e-002

| tau      | ppm    | integral     | intensity    |
|----------|--------|--------------|--------------|
| 10.000m  | 13.883 | -8.9749e+006 | -1.0352e+006 |
| 100.000m | 13.882 | -7.4661e+006 | -8.6828e+005 |
| 250.000m | 13.882 | -4.601e+006  | -5.431e+005  |
| 500.000m | 13.881 | 4.1777e+005  | 16118        |
| 1.000s   | 13.882 | 5.2829e+006  | 5.4368e+005  |
| 2.000s   | 13.882 | 8.8438e+006  | 9.1933e+005  |
| 3.000s   | 13.882 | 1.0324e+007  | 1.065e+006   |
| 4.000s   | 13.882 | 1.1004e+007  | 1.1288e+006  |
| 5.000s   | 13.882 | 1.1359e+007  | 1.1585e+006  |
| 10.000s  | 13.882 | 1.1884e+007  | 1.1804e+006  |

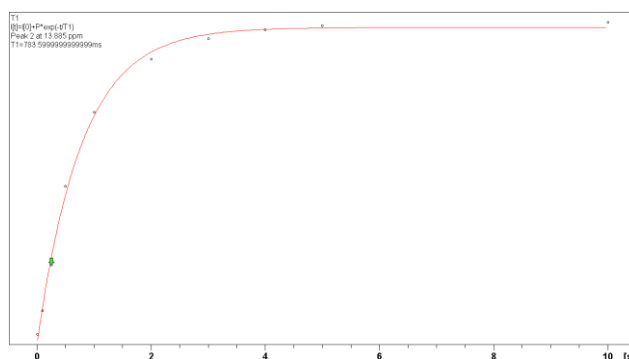

10 points for Peak 3, Peak Point at 13.606 ppm

$I[0] = 9.236e-001$ ;  $P = -1.677e+000$ ;  $T1 = 707.724$  ms; SD = 5.306e-002

| tau      | ppm    | integral     | intensity |
|----------|--------|--------------|-----------|
| 10.000m  | 13.605 | -4.9625e+005 | -54153    |
| 100.000m | 13.604 | -3.1041e+005 | -42445    |
| 250.000m | 13.605 | -1228        | -18052    |
| 500.000m | 13.603 | 4.9998e+005  | 14327     |
| 1.000s   | 13.604 | 8.3465e+005  | 34807     |
| 2.000s   | 13.605 | 1.1495e+006  | 54738     |
| 3.000s   | 13.604 | 1.3502e+006  | 63735     |
| 4.000s   | 13.604 | 1.4568e+006  | 67946     |
| 5.000s   | 13.604 | 1.5534e+006  | 69933     |
| 10.000s  | 13.604 | 1.8239e+006  | 73908     |

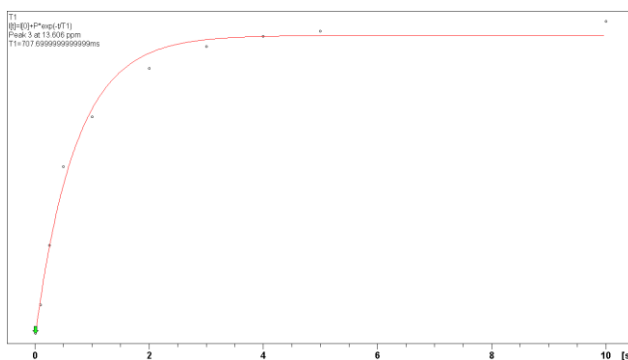

10 points for Peak 6, Peak Point at 3.450 ppm

$I[0] = 9.462e-001$ ;  $P = -1.951e+000$ ;  $T1 = 561.890$  ms; SD = 5.495e-002

| tau      | ppm   | integral     | intensity    |
|----------|-------|--------------|--------------|
| 10.000m  | 3.450 | -1.122e+009  | -4.1017e+008 |
| 100.000m | 3.450 | -8.438e+008  | -3.1389e+008 |
| 250.000m | 3.450 | -3.2756e+008 | -1.1888e+008 |
| 500.000m | 3.449 | 2.2689e+008  | 1.0132e+008  |
| 1.000s   | 3.449 | 6.001e+008   | 2.2683e+008  |
| 2.000s   | 3.449 | 9.8795e+008  | 3.4514e+008  |
| 3.000s   | 3.449 | 1.148e+009   | 3.9053e+008  |
| 4.000s   | 3.449 | 1.2178e+009  | 4.1007e+008  |
| 5.000s   | 3.449 | 1.2491e+009  | 4.1769e+008  |
| 10.000s  | 3.450 | 1.2688e+009  | 4.2528e+008  |

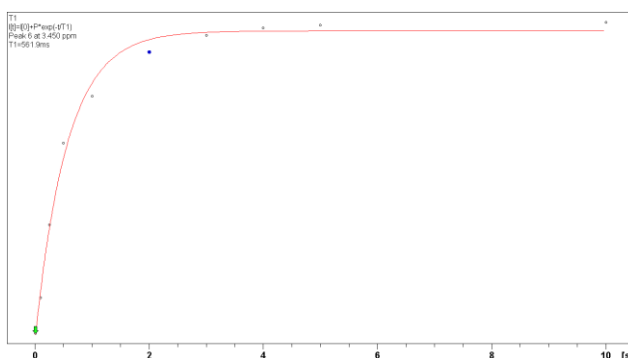

**Figure S2.** Inversion-recovery measurement of  $T_1$  for the NH and H<sub>2</sub>O signals of **9d** in DMSO-*d*<sub>6</sub> at 17 °C, ratio triazoles:H<sub>2</sub>O of 4:96.

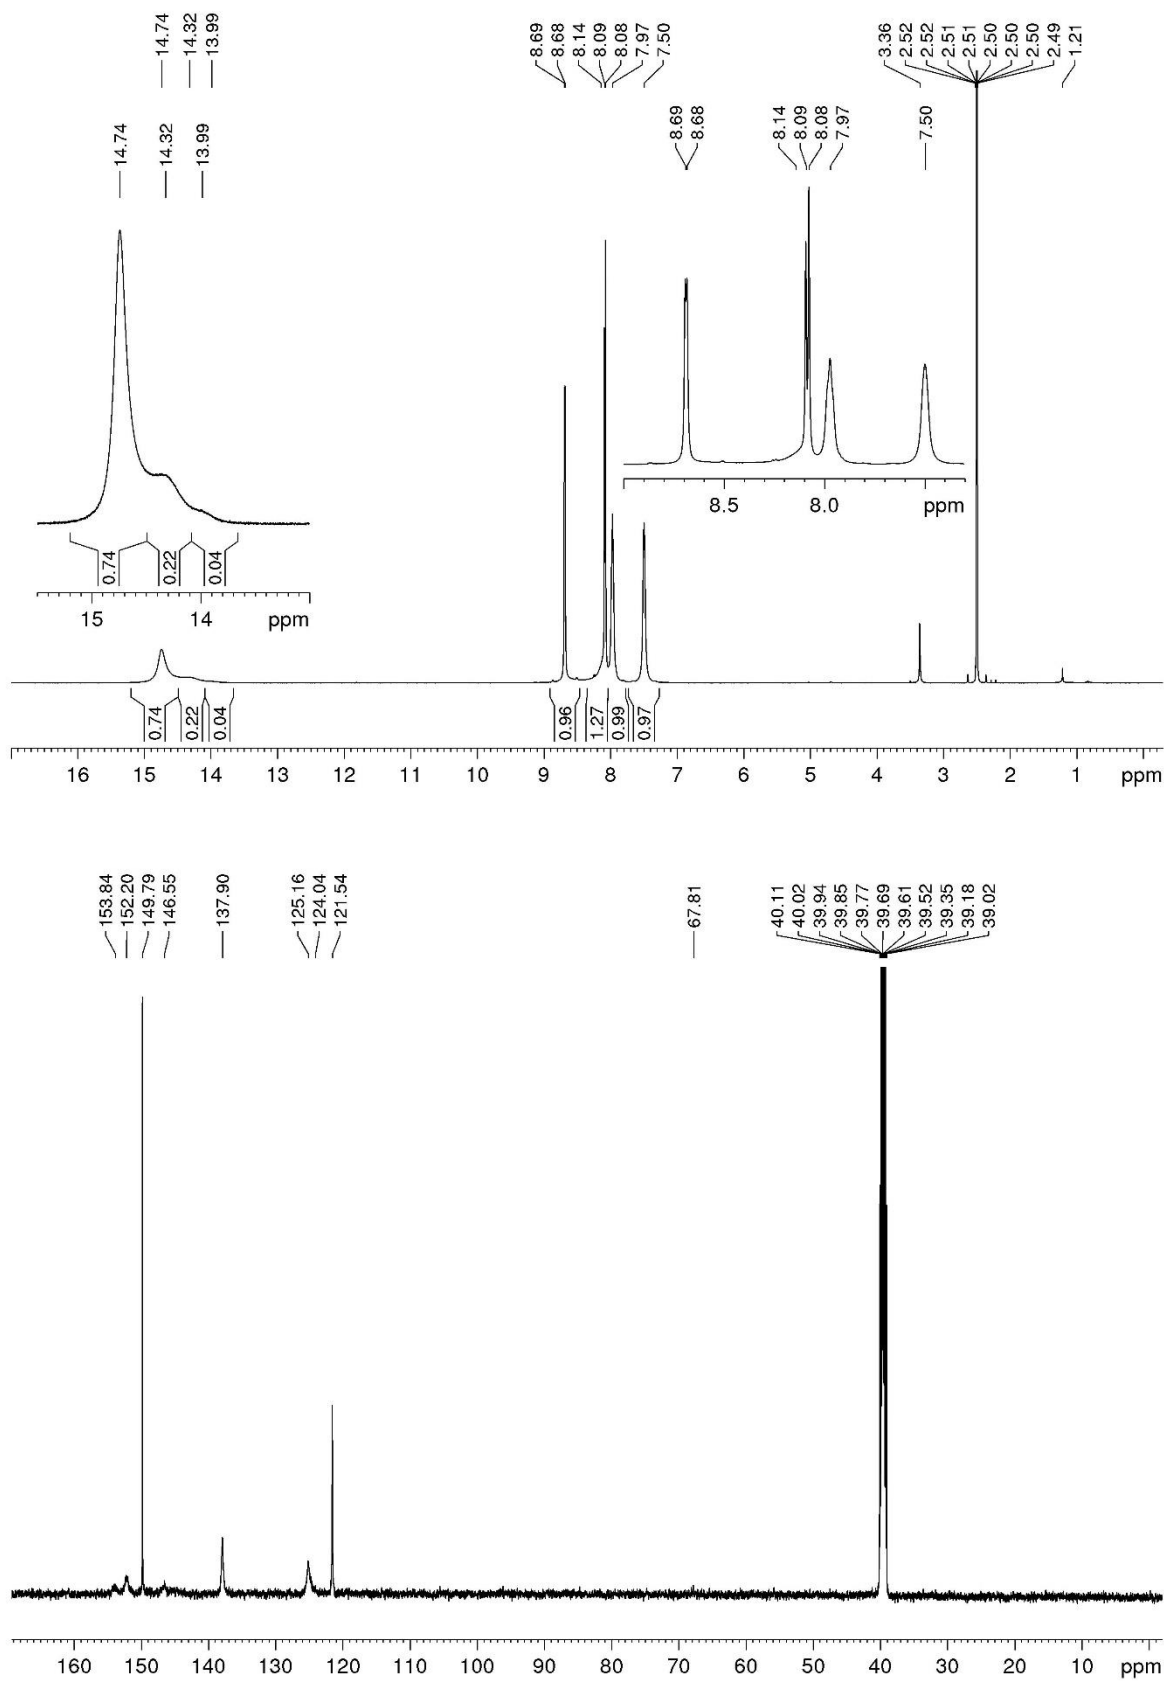

**Figure S3.** (Top)  $^1\text{H}$ - (500.13 MHz) and (bottom)  $^{13}\text{C}$ -NMR (125.76 MHz) spectra of pyridinetriazol **9a** in  $\text{DMSO-}d_6$  at 17 °C.

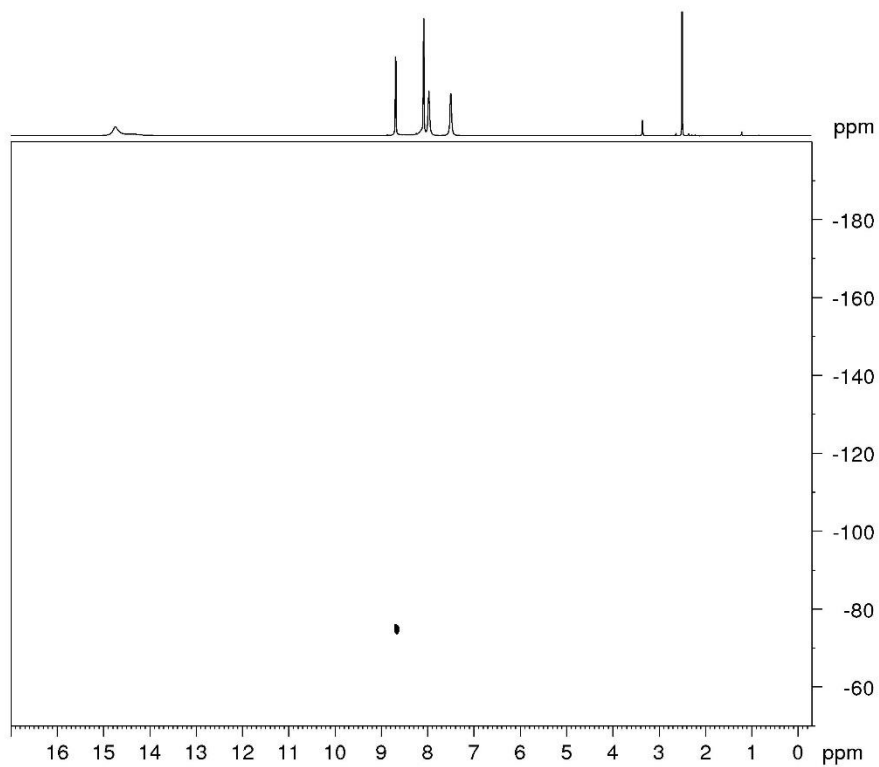

**Figure S4.**  $^1\text{H}$ ,  $^{15}\text{N}$  HMQC (500.13 MHz) spectrum of pyridinetriazol **9a** in  $\text{DMSO-}d_6$  at 17 °C. The broad singlet of H3 narrowed to a signal of half line-width of 8.5 Hz upon heating at 110 °C. However, no  $^1\text{H}$ ,  $^{15}\text{N}$  correlations were observed.

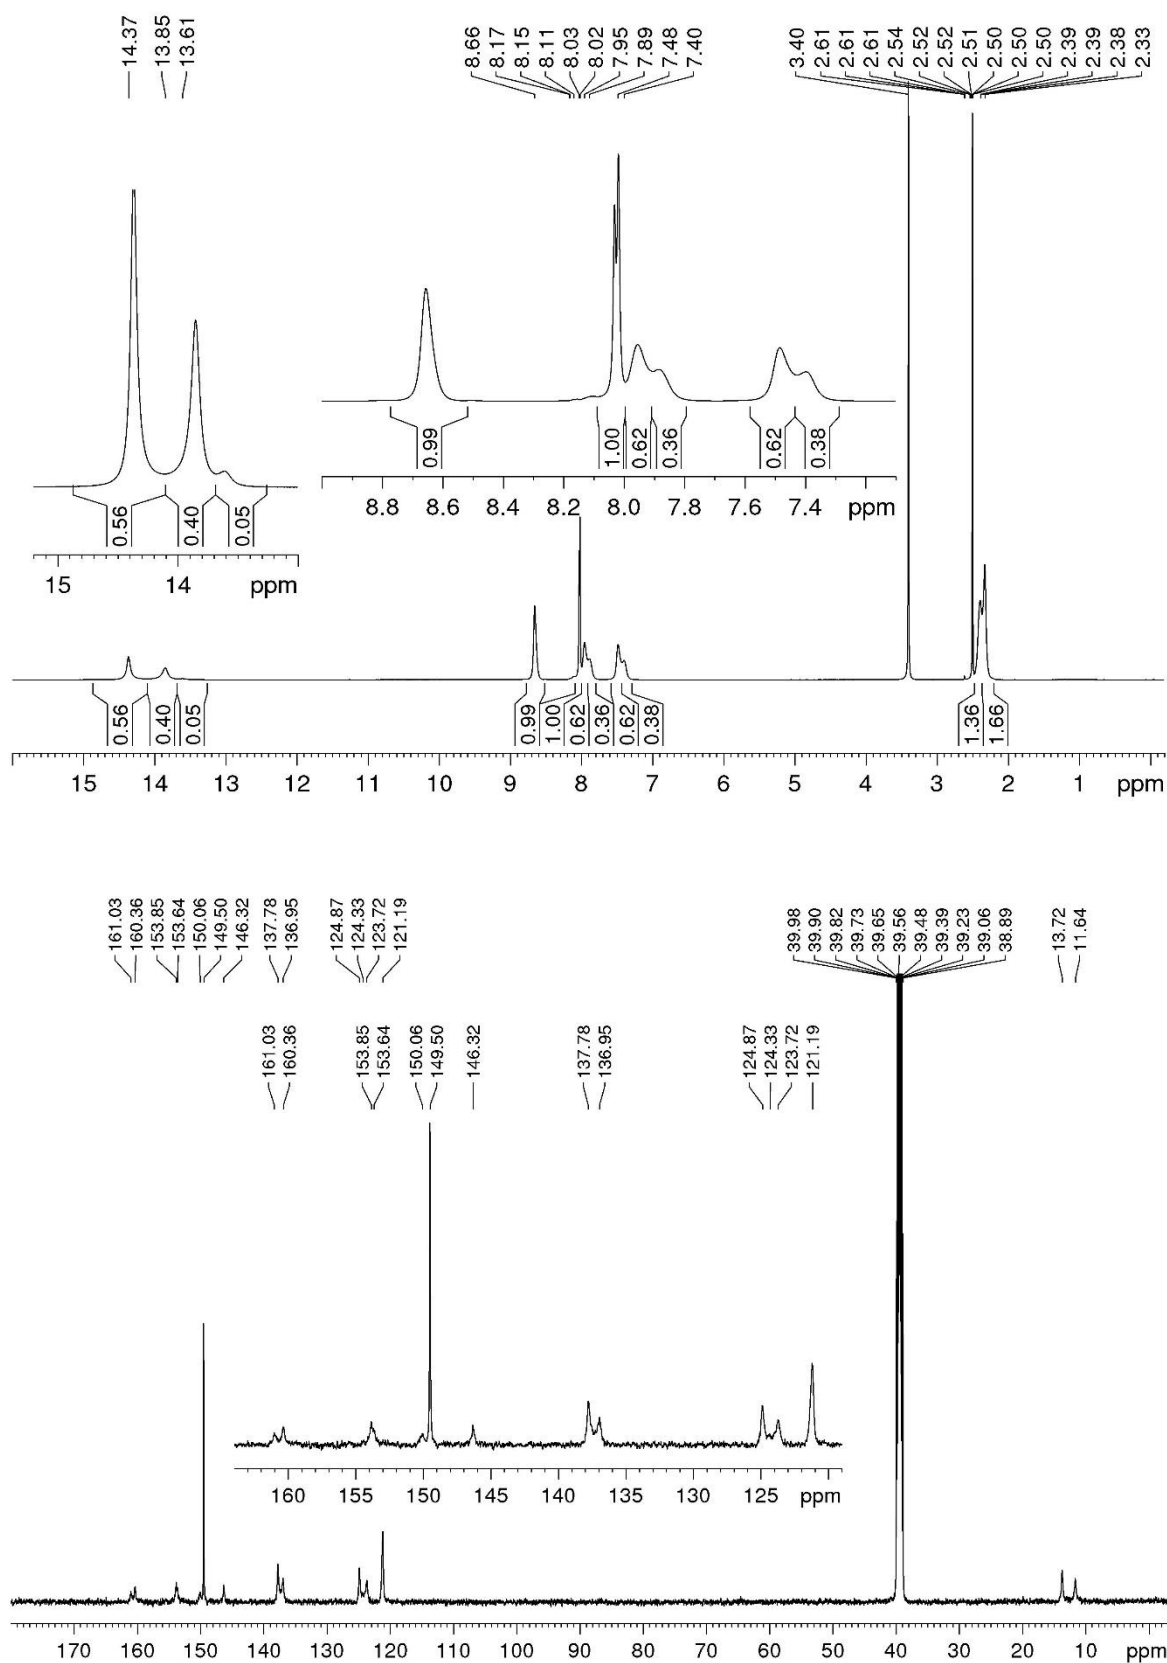

**Figure S5.** (Top) <sup>1</sup>H- (600.13 MHz) and (bottom) <sup>13</sup>C-NMR (125.76 MHz) spectra of pyridinetriazol **9b** in DMSO-*d*<sub>6</sub> at 17 °C.



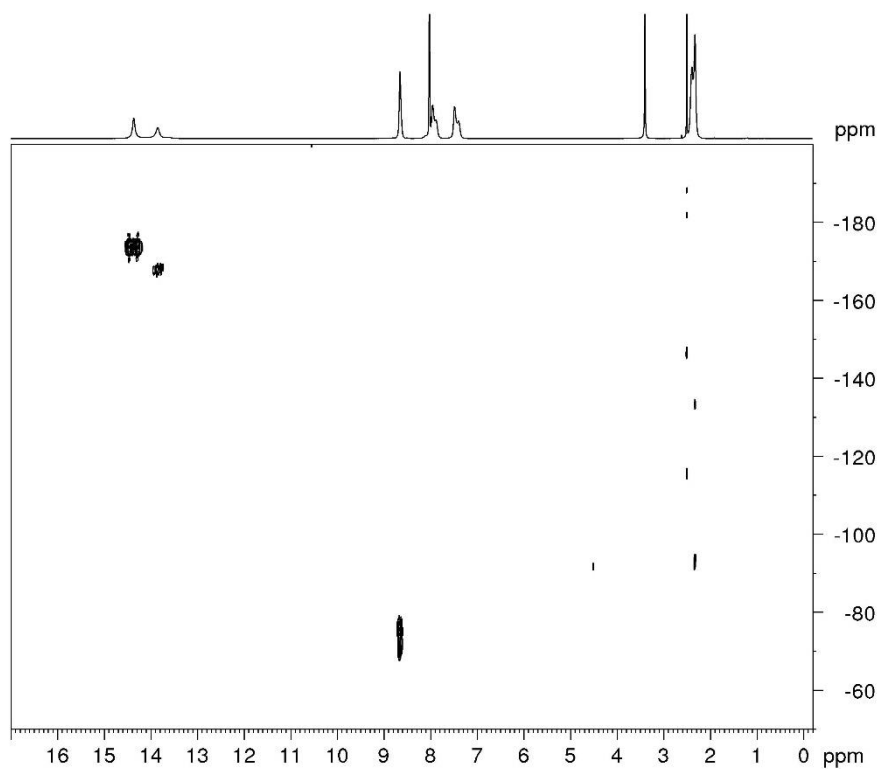

**Figure S6.**  $^1\text{H},^{15}\text{N}$  HMQC (600.13 MHz) spectrum of pyridinetriazol **9b** in  $\text{DMSO-}d_6$  at 17 °C.

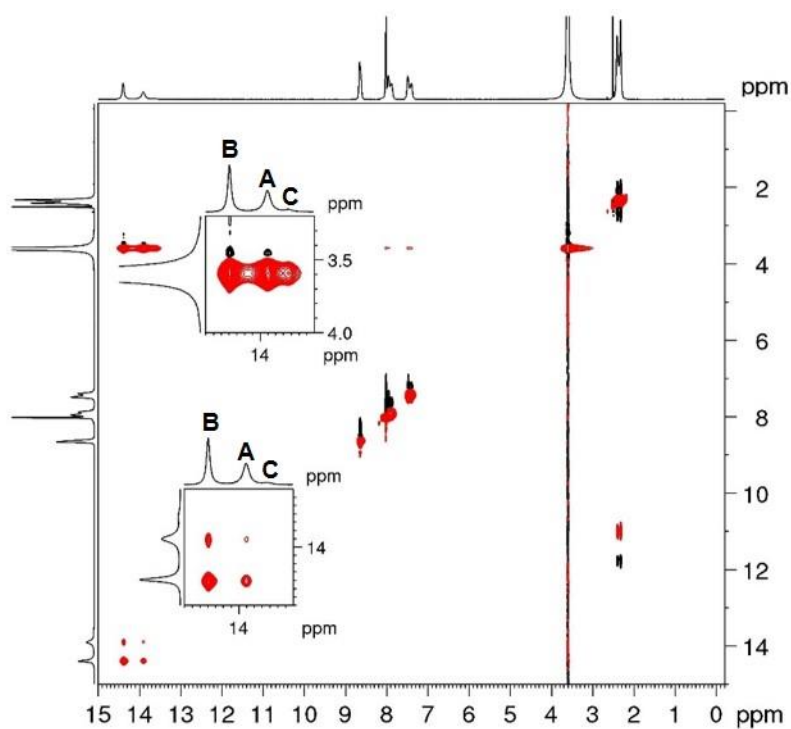

**Figure S7.**  $^1\text{H}$  EXSY spectrum (500.13 MHz, negative peaks in red) of pyridinetriazol **9b** in  $\text{DMSO-}d_6$  at 17 °C, ratio triazoles: $\text{H}_2\text{O}$  of 6:94, mixing time of 25 ms.

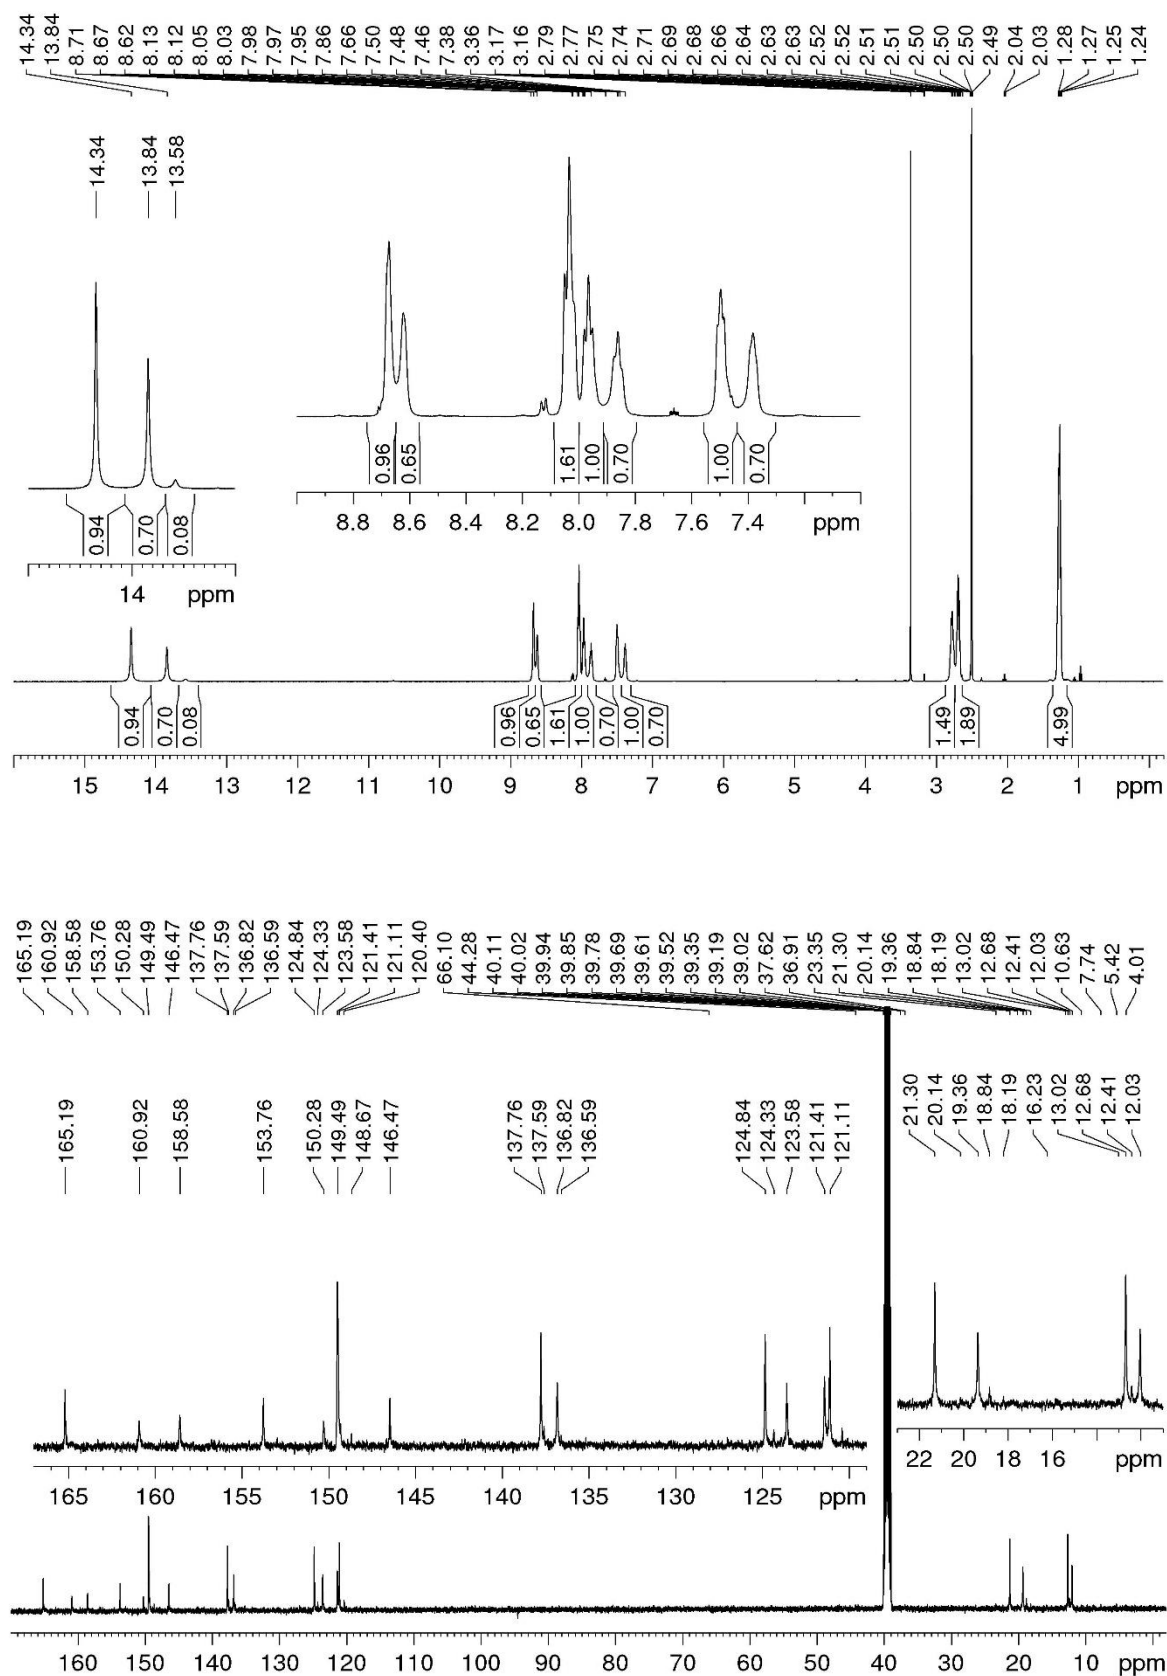

**Figure S8.** (Top) <sup>1</sup>H- (500.13 MHz) and (bottom) <sup>13</sup>C-NMR (125.76 MHz) spectra of pyridinetriazol **9c** in DMSO-*d*<sub>6</sub> at 17 °C.

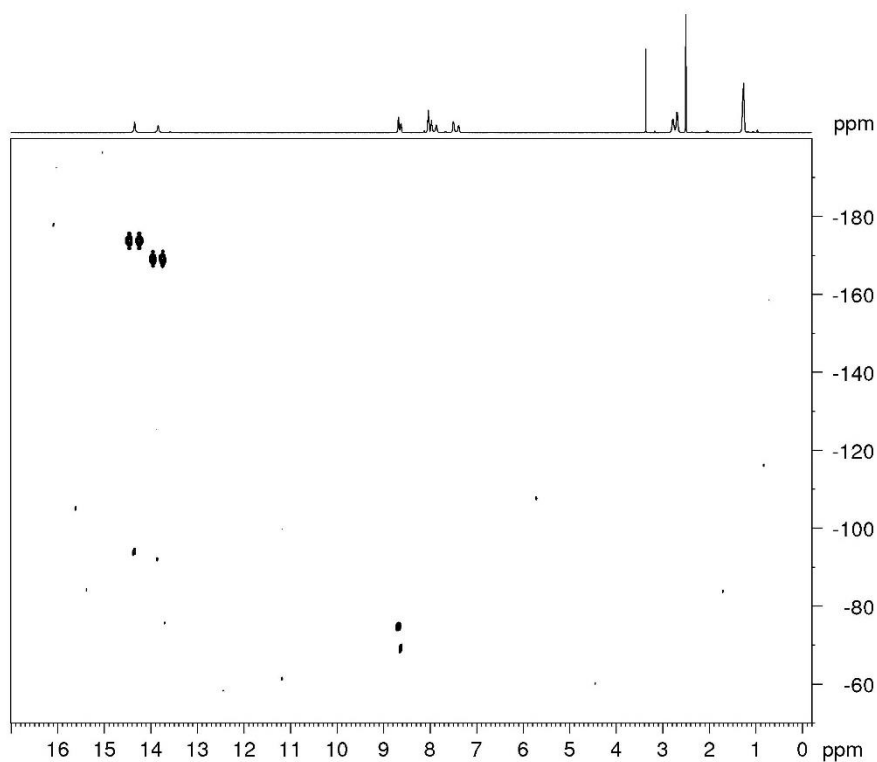

**Figure S9.**  $^1\text{H}$ ,  $^{15}\text{N}$  HMQC spectrum (500.13 MHz) of pyridinetriazol **9c** in  $\text{DMSO-}d_6$  at 17 °C.

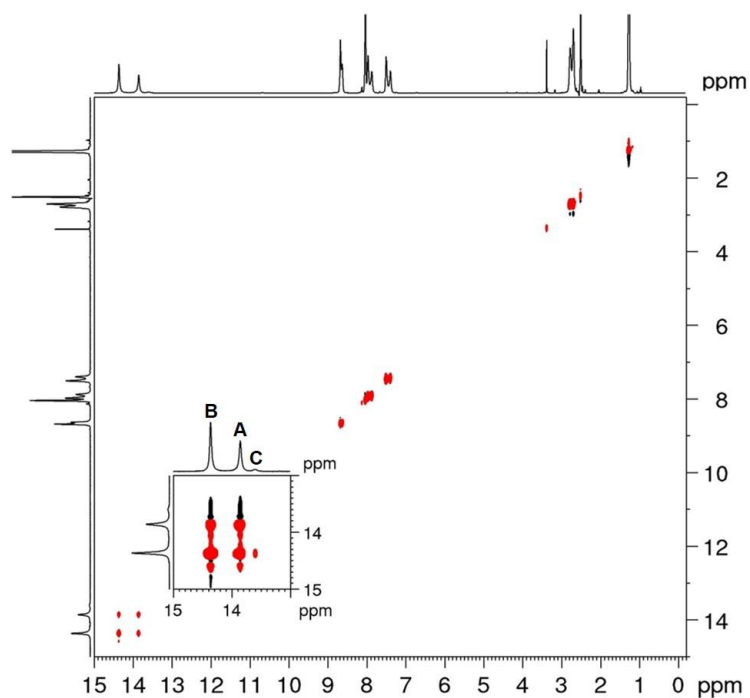

**Figure S10.**  $^1\text{H}$  EXSY spectrum (600.13 MHz, negative peaks in red) of pyridinetriazol **9c** in  $\text{DMSO-}d_6$  at 17 °C, ratio triazoles: $\text{H}_2\text{O}$  of 94:6, mixing time of 25 ms. The inset shows the expansion of the NH region at a lower threshold. The peaks detected do not allow to obtain the exchange parameters of tautomer **C**.

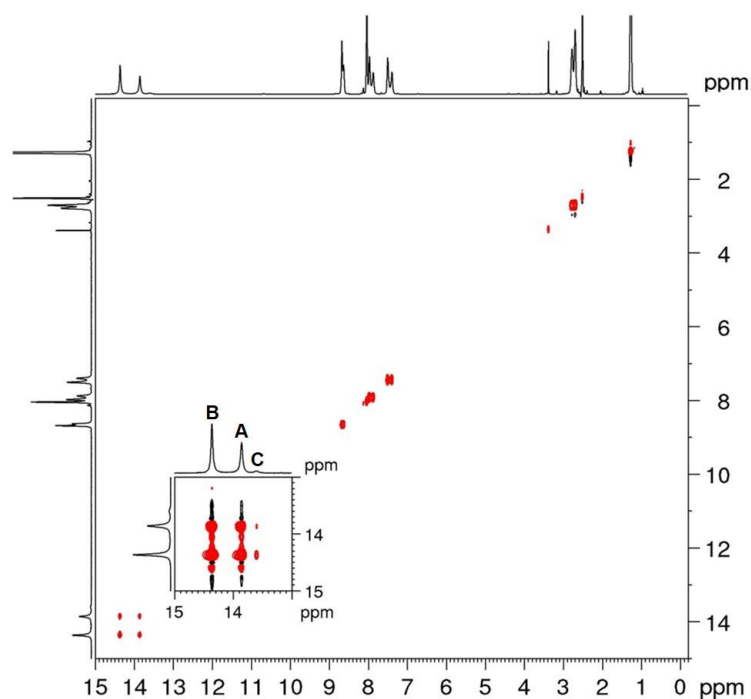

**Figure S11.**  $^1\text{H}$  EXSY spectrum (600.13 MHz, negative peaks in red) of pyridinetriazol **9c** in  $\text{DMSO-}d_6$  at 17 °C, ratio triazoles: $\text{H}_2\text{O}$  of 94:6, mixing time of 50 ms. The inset shows the expansion of the NH region at a lower threshold. The peaks detected do not allow to obtain the exchange parameters of tautomer **C**.

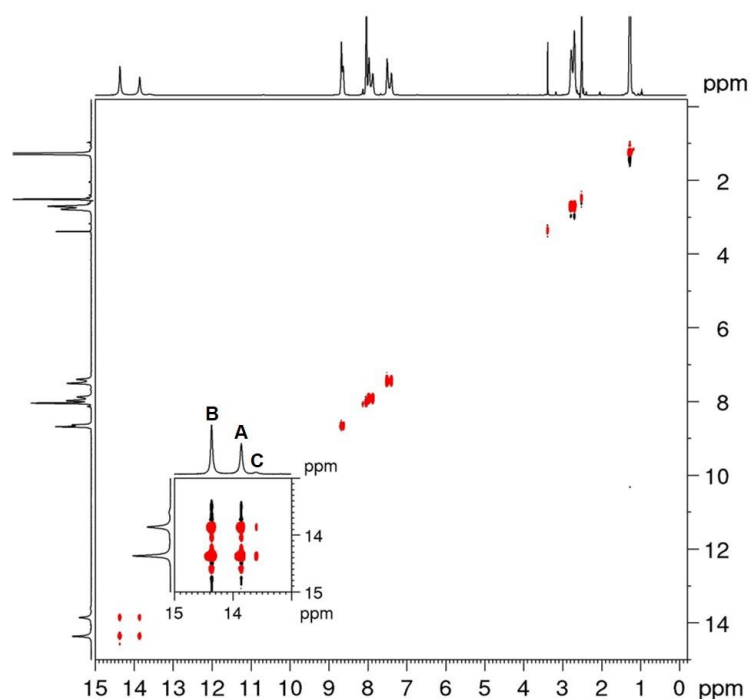

**Figure S12.**  $^1\text{H}$  EXSY spectrum (600.13 MHz, negative peaks in red) of pyridinetriazol **9c** in  $\text{DMSO-}d_6$  at 17 °C, ratio triazoles: $\text{H}_2\text{O}$  of 94:6, mixing time of 100 ms. The inset shows the expansion of the NH region at a lower threshold. The peaks detected do not allow to obtain the exchange parameters of tautomer **C**.

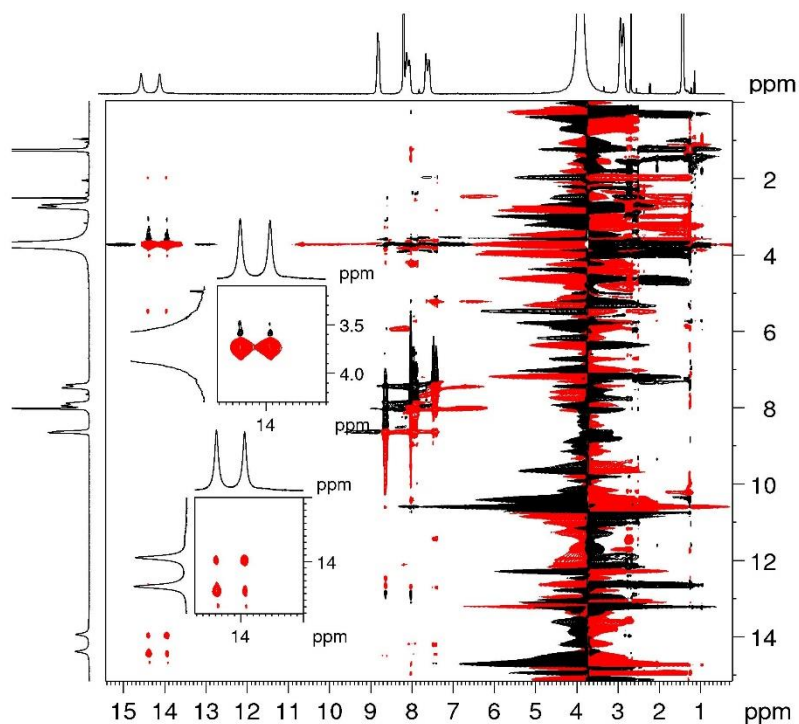

**Figure S13.**  $^1\text{H}$  EXSY spectrum (500.13 MHz, negative peaks in red) of pyridinetriazol **9c** in  $\text{DMSO-}d_6$  at 17 °C, ratio triazoles: $\text{H}_2\text{O}$  of 2:98, mixing time of 25 ms.

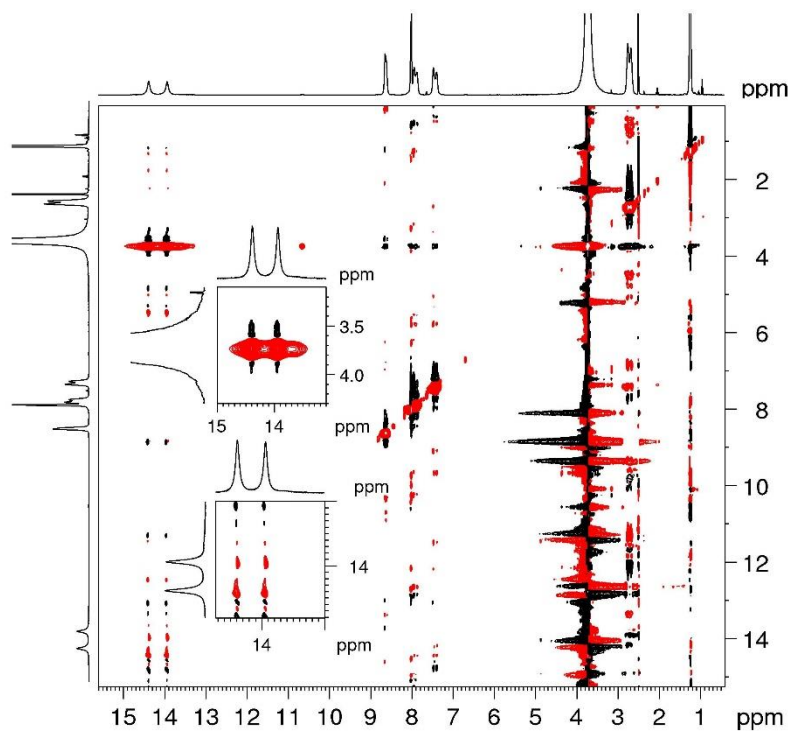

**Figure S14.**  $^1\text{H}$  EXSY spectrum (500.13 MHz, negative peaks in red) of pyridinetriazol **9c** in  $\text{DMSO-}d_6$  at 17 °C, ratio triazoles: $\text{H}_2\text{O}$  of 2:98, mixing time of 50 ms.

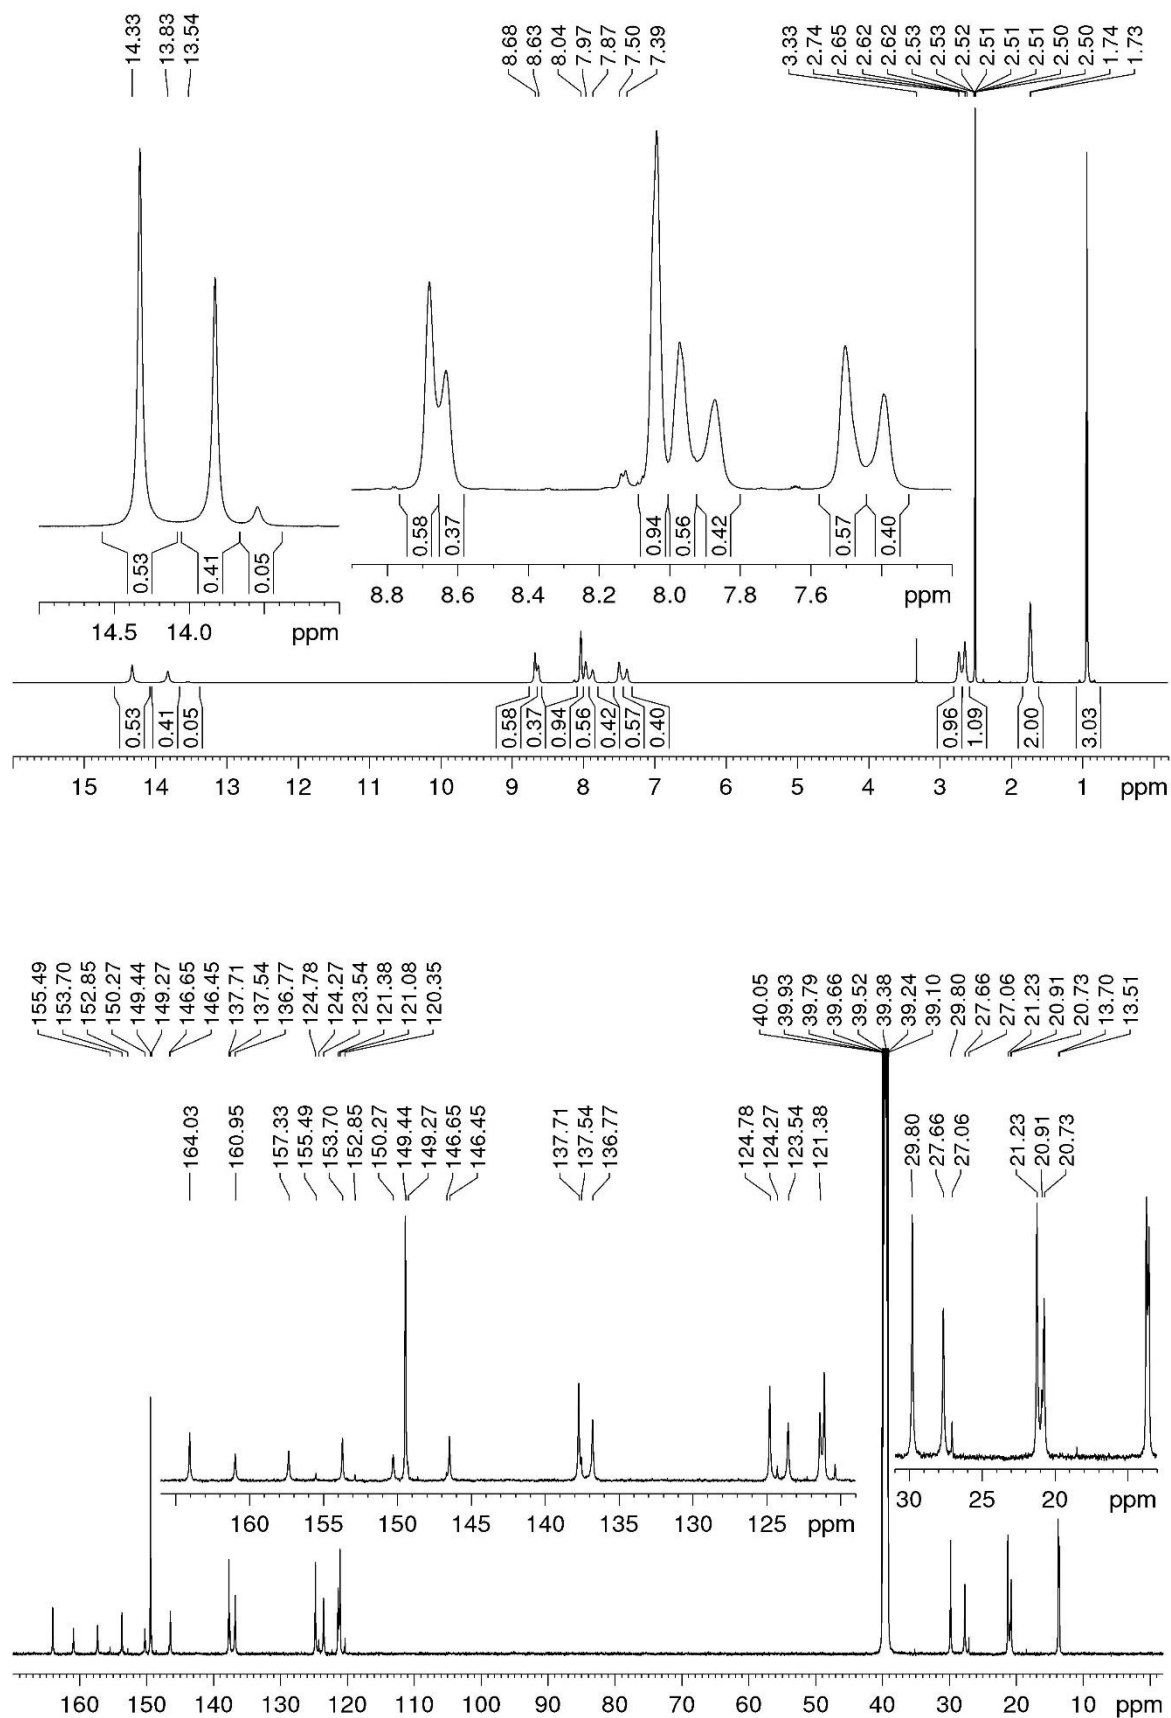

**Figure S15.** (Top)  $^1\text{H}$ - (600.13 MHz) and (bottom)  $^{13}\text{C}$ -NMR (150.9 MHz) spectra of pyridinetriazol **9d** in  $\text{DMSO-}d_6$  at 17 °C.

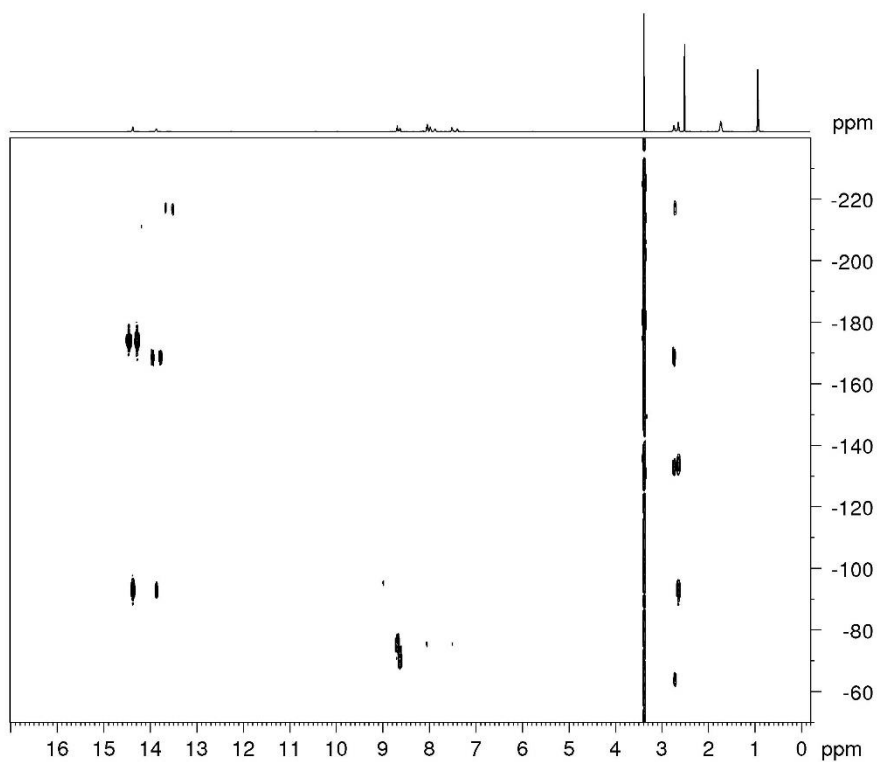

**Figure S16.**  $^1\text{H},^{15}\text{N}$  HMQC spectrum (600.13 MHz) of pyridinetriazol **9d** optimized for  $J_{\text{NH}} = 10$  Hz in  $\text{DMSO}-d_6$  at  $17^\circ\text{C}$ .

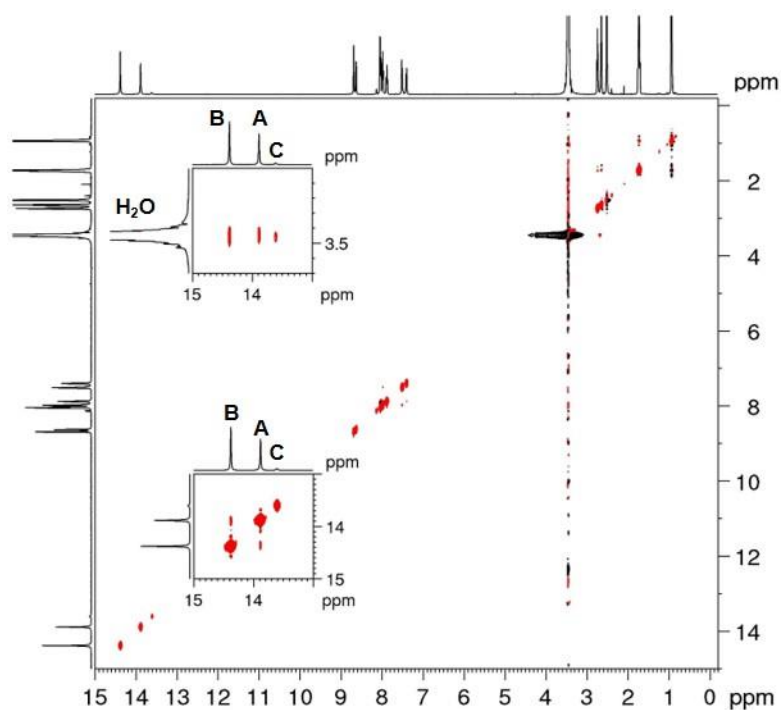

**Figure S17.**  $^1\text{H}$  EXSY spectra (600.13 MHz, negative peaks in red) of pyridinetriazol **9d** in  $\text{DMSO}-d_6$  at  $17^\circ\text{C}$ , ratio triazoles: $\text{H}_2\text{O}$  of 4:96, mixing time of 2.6 ms.

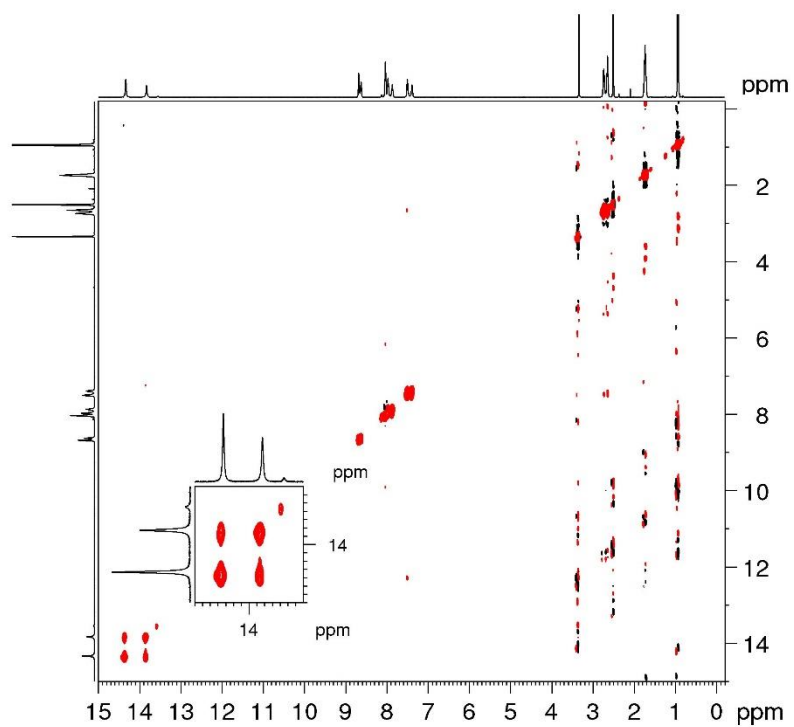

**Figure S18.**  $^1\text{H}$  EXSY spectra (600.13 MHz, negative peaks in red) of pyridinetriazol **9d** in  $\text{DMSO-}d_6$  at 17 °C, ratio triazoles: $\text{H}_2\text{O}$  of 58:42, mixing time of 50 ms.



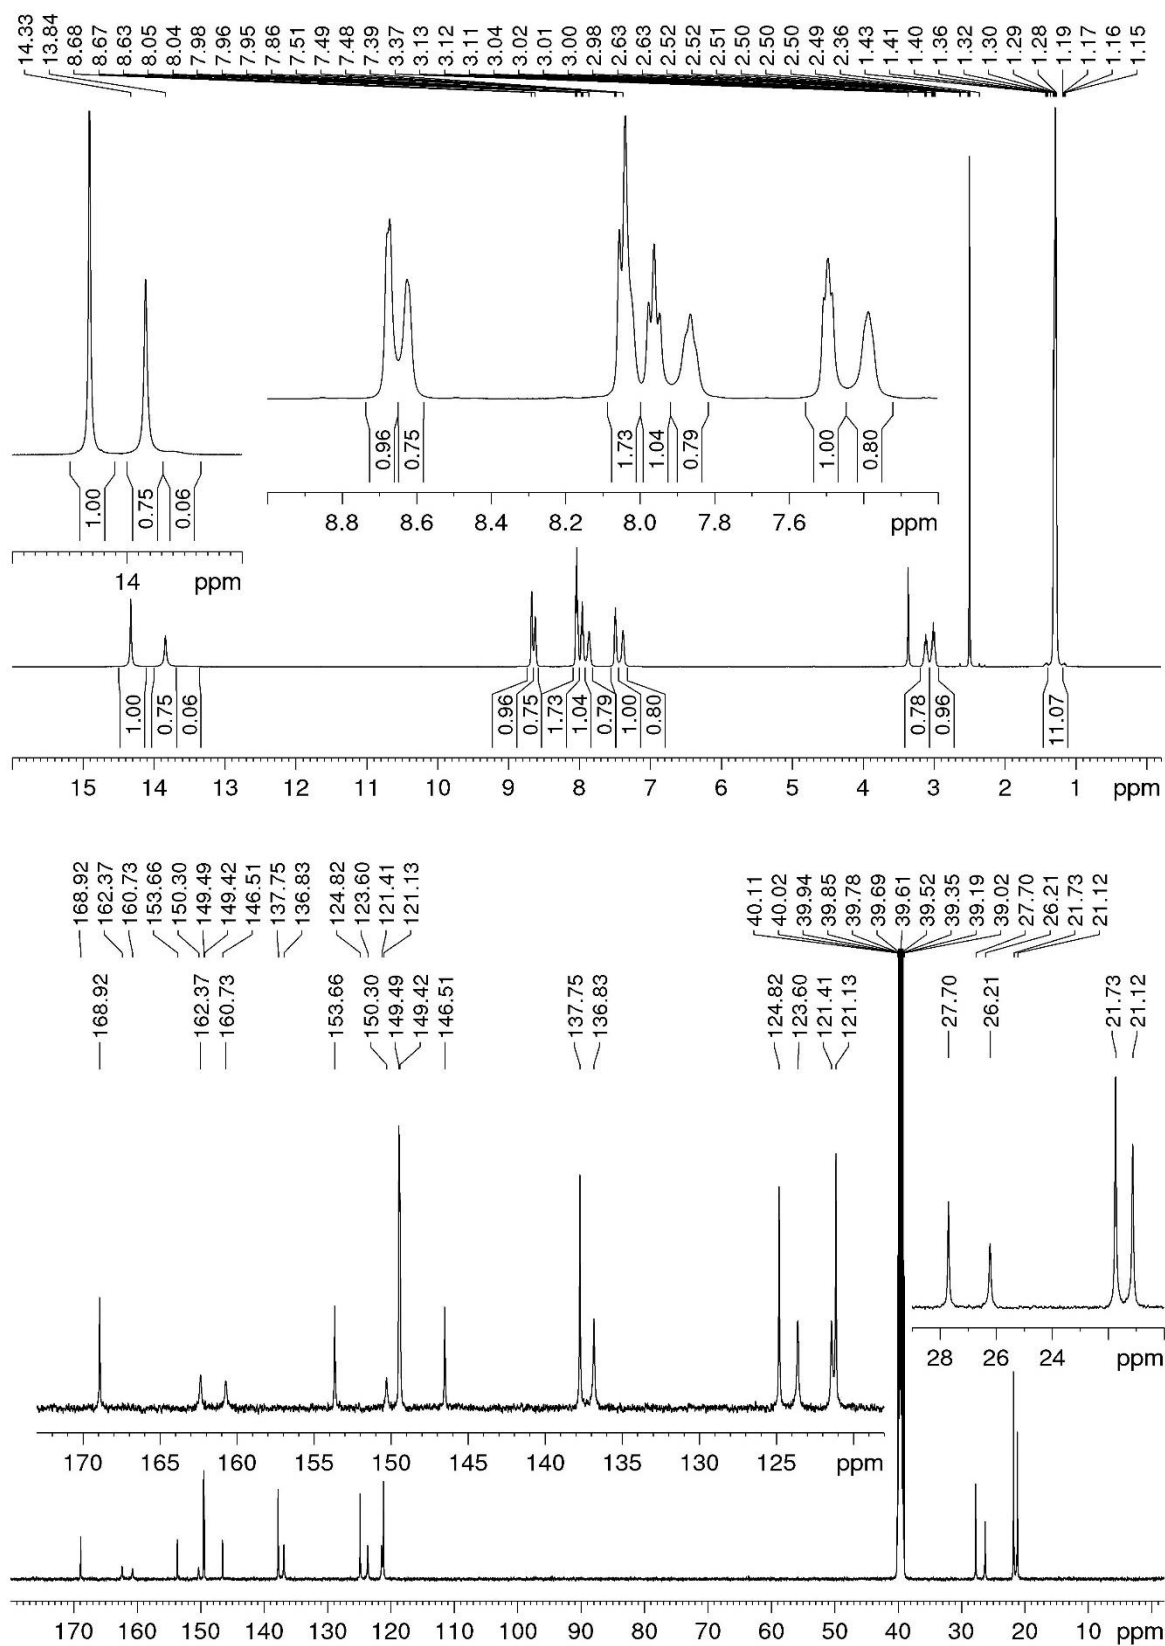

**Figure S19.** (Top) <sup>1</sup>H- (500.13 MHz) and (bottom) <sup>13</sup>C-NMR (125.76 MHz) spectra of pyridinetriazol **9e** in DMSO-*d*<sub>6</sub> at 17 °C.

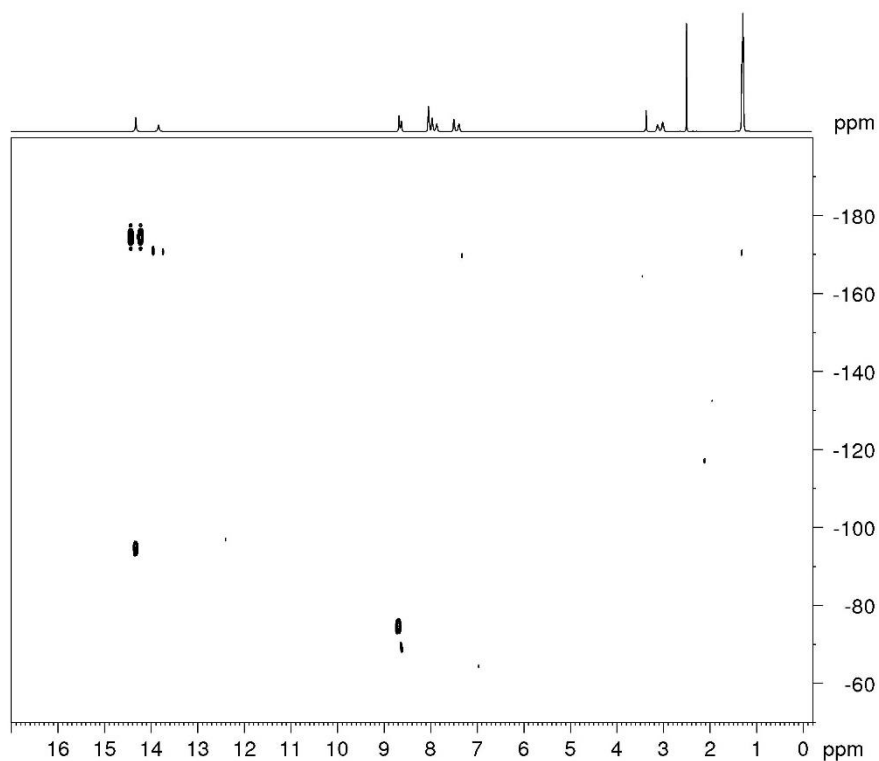

**Figure S20.**  $^1\text{H}$ ,  $^{15}\text{N}$  HMQC spectrum (500.13 MHz) of pyridinetriazol **9e** in  $\text{DMSO-}d_6$  at 17 °C.

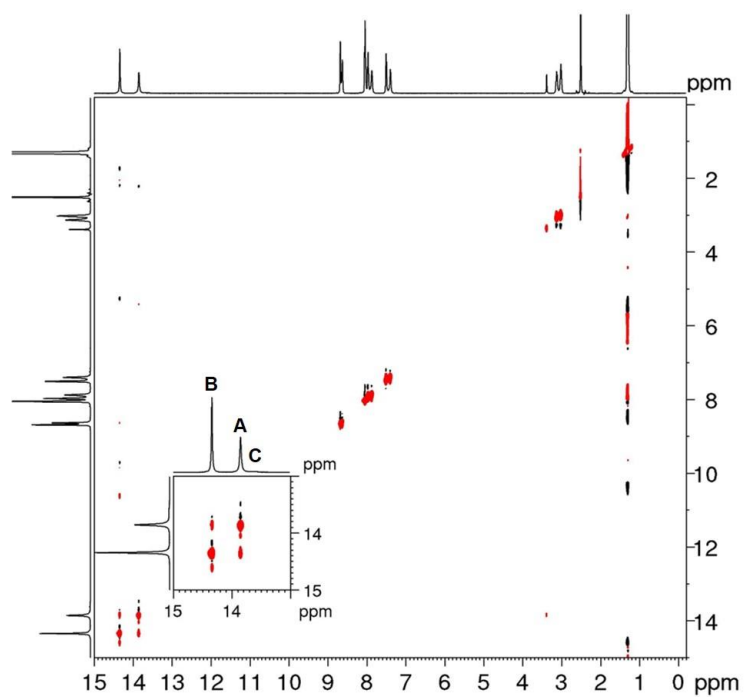

**Figure S21.**  $^1\text{H}$  EXSY spectrum (600.13 MHz, negative peaks in red) of pyridinetriazol **9e** in  $\text{DMSO-}d_6$  at 17 °C, ratio triazoles: $\text{H}_2\text{O}$  of 93:7, mixing time of 25 ms.

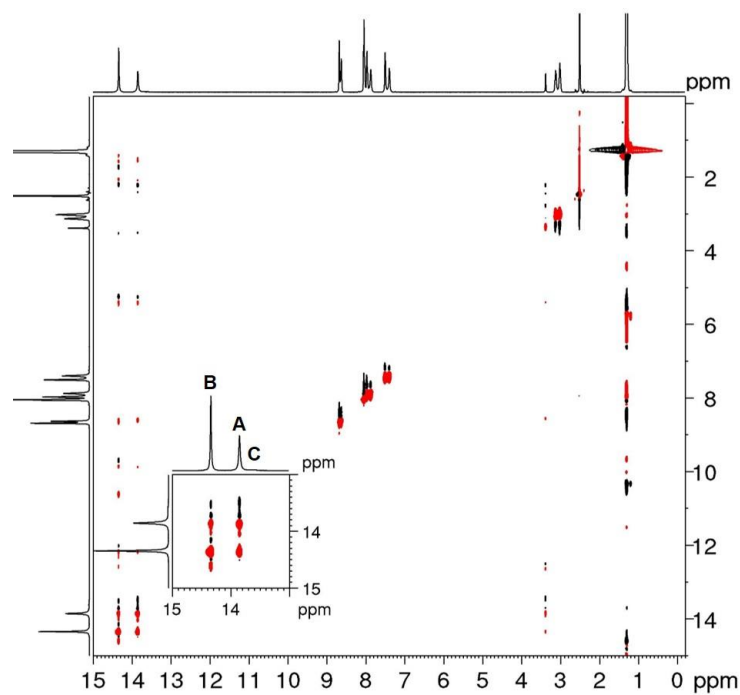

**Figure S22.**  $^1\text{H}$  EXSY spectrum (600.13 MHz, negative peaks in red) of pyridinetriazol **9e** in  $\text{DMSO-}d_6$  at 17  $^\circ\text{C}$ , ratio triazoles: $\text{H}_2\text{O}$  of 93:7, mixing time of 50 ms.

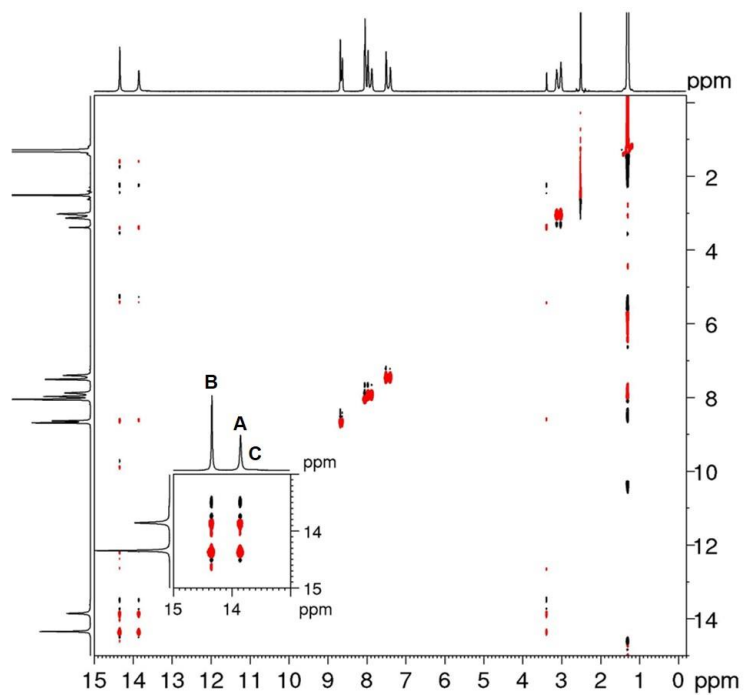

**Figure S23.**  $^1\text{H}$  EXSY spectrum (600.13 MHz, negative peaks in red) of pyridinetriazol **9e** in  $\text{DMSO-}d_6$  at 17  $^\circ\text{C}$ , ratio triazoles: $\text{H}_2\text{O}$  of 93:7, mixing time of 100 ms.

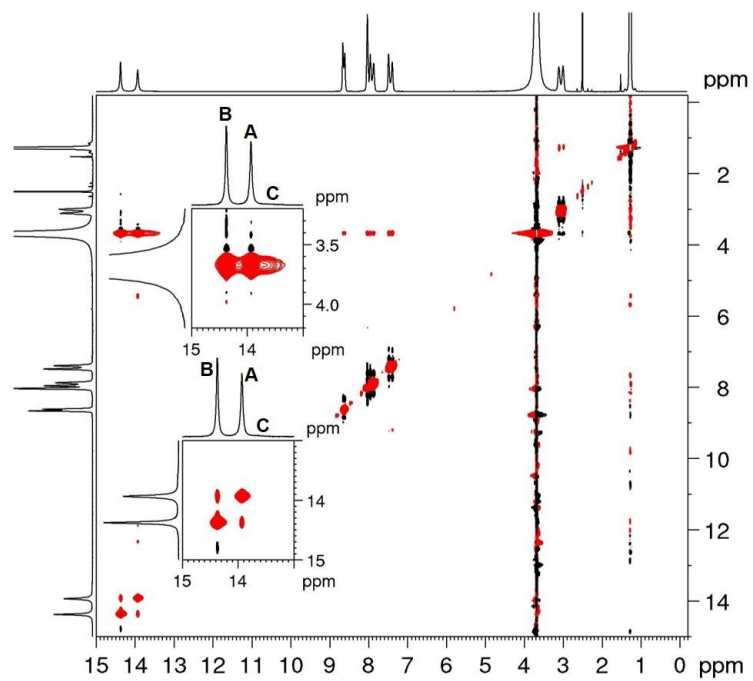

**Figure S24.**  $^1\text{H}$  EXSY spectrum (500.13 MHz, negative peaks in red) of pyridinetriazol **9e** in  $\text{DMSO-}d_6$  at 17 °C, ratio triazoles: $\text{H}_2\text{O}$  of 13:87, mixing time of 25 ms.

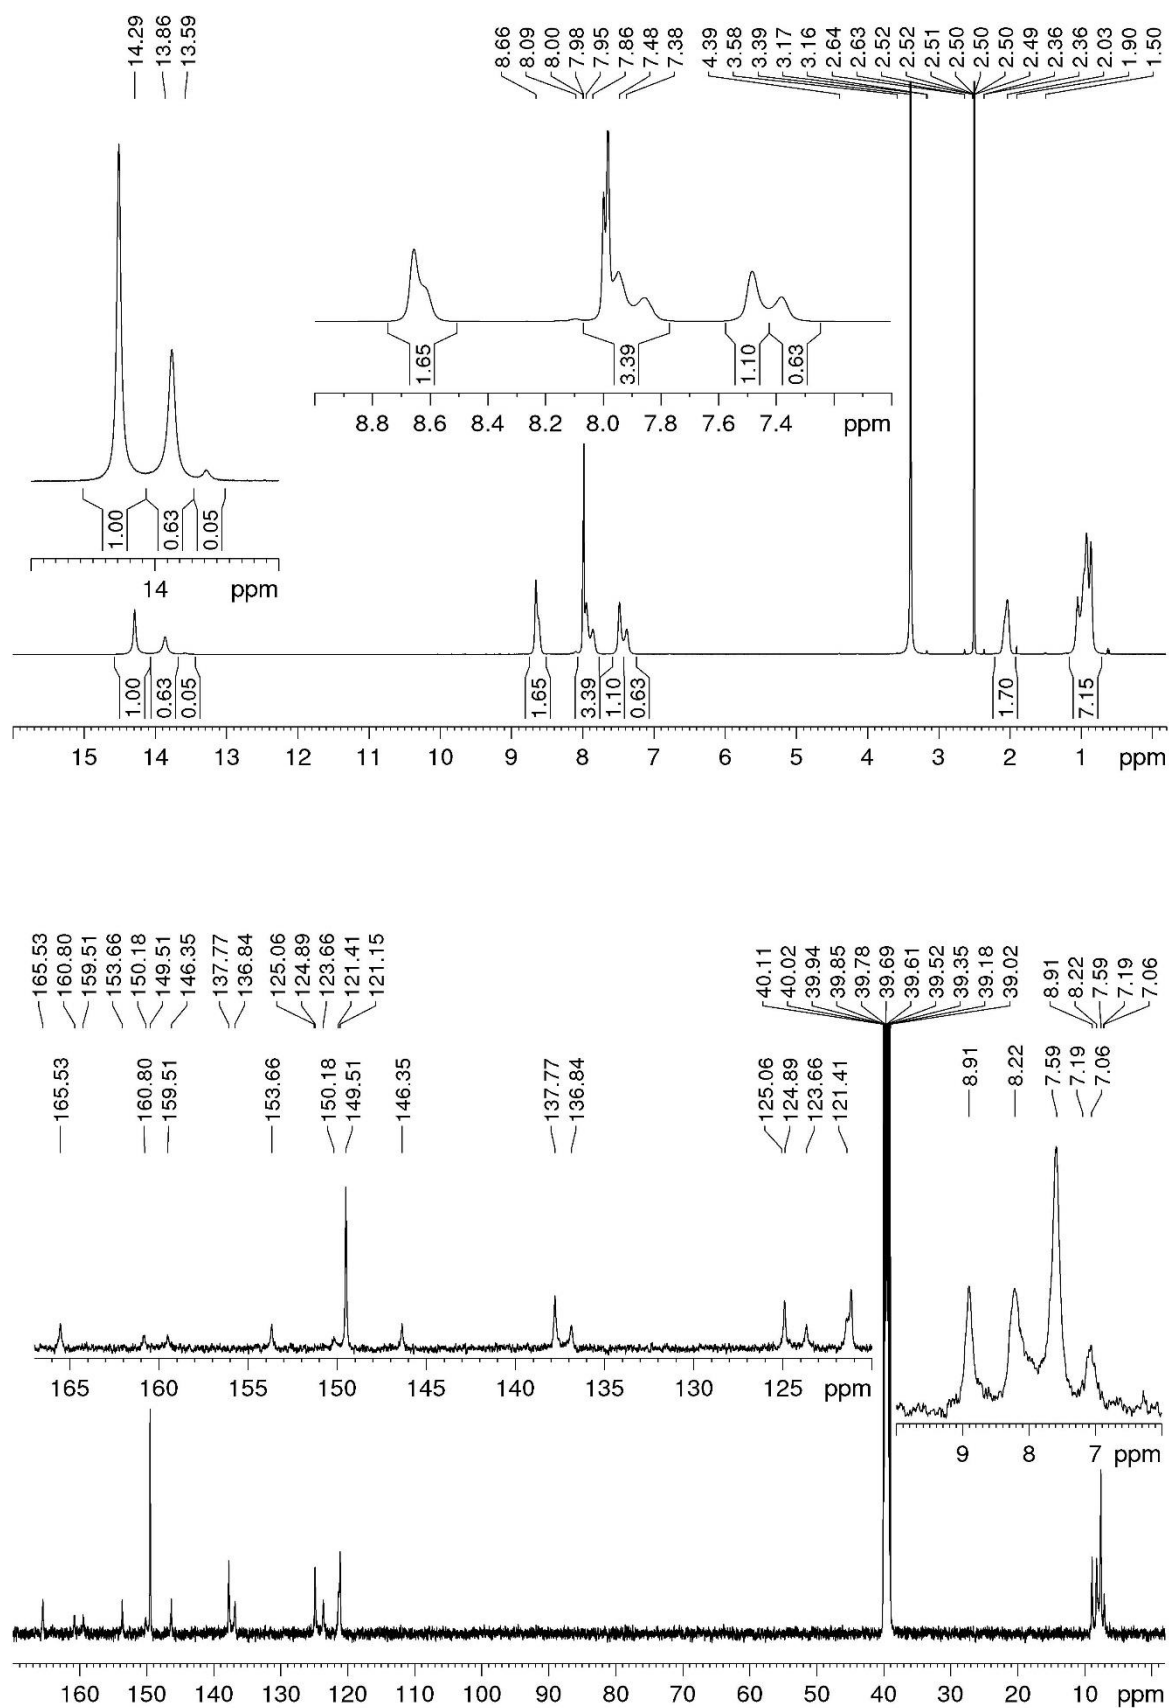

**Figure S25.** (Top) <sup>1</sup>H- (500.13 MHz) and (bottom) <sup>13</sup>C-NMR (125.76 MHz) spectra of pyridinetriazol **9f** in DMSO-*d*<sub>6</sub> at 17 °C.

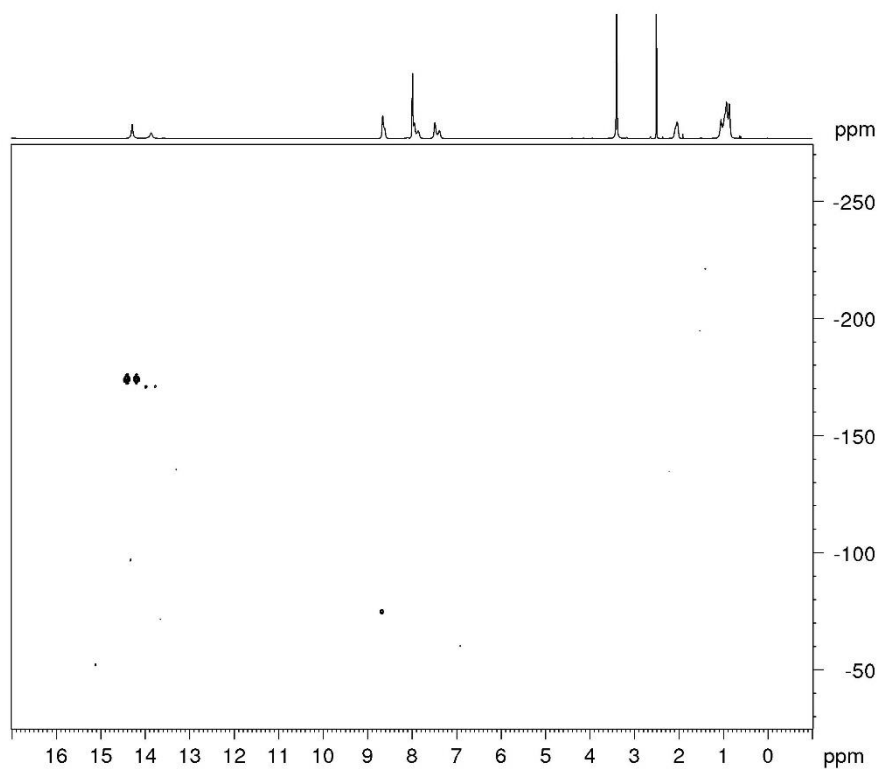

**Figure S26.**  $^1\text{H}$ ,  $^{15}\text{N}$  HMQC spectrum (500.13 MHz) of pyridinetriazol **9f** in  $\text{DMSO-}d_6$  at 17 °C.

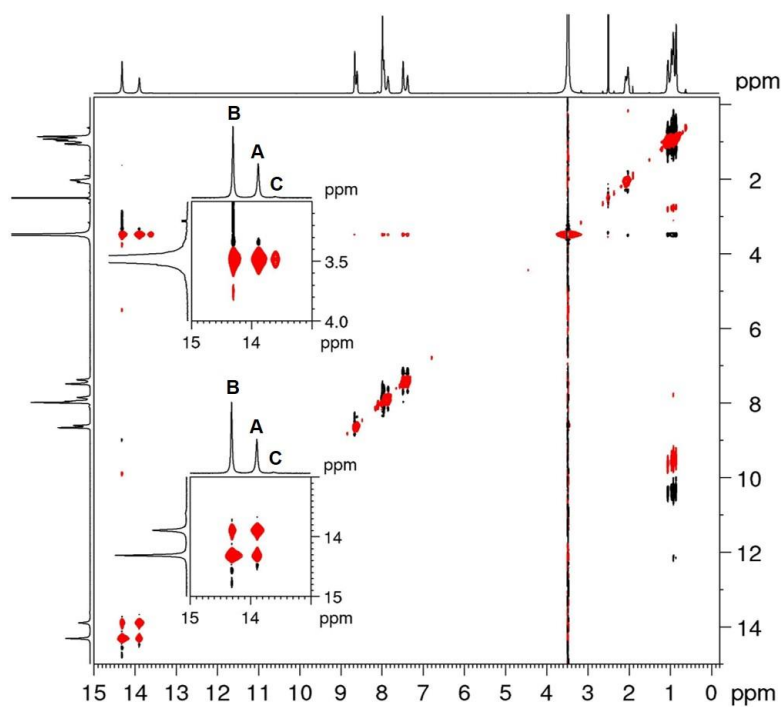

**Figure S27.**  $^1\text{H}$  EXSY spectrum (500.13 MHz, negative peaks in red) of pyridinetriazol **9f** in  $\text{DMSO-}d_6$  at 17 °C, ratio triazoles: $\text{H}_2\text{O}$  of 13:87, mixing time of 25 ms.

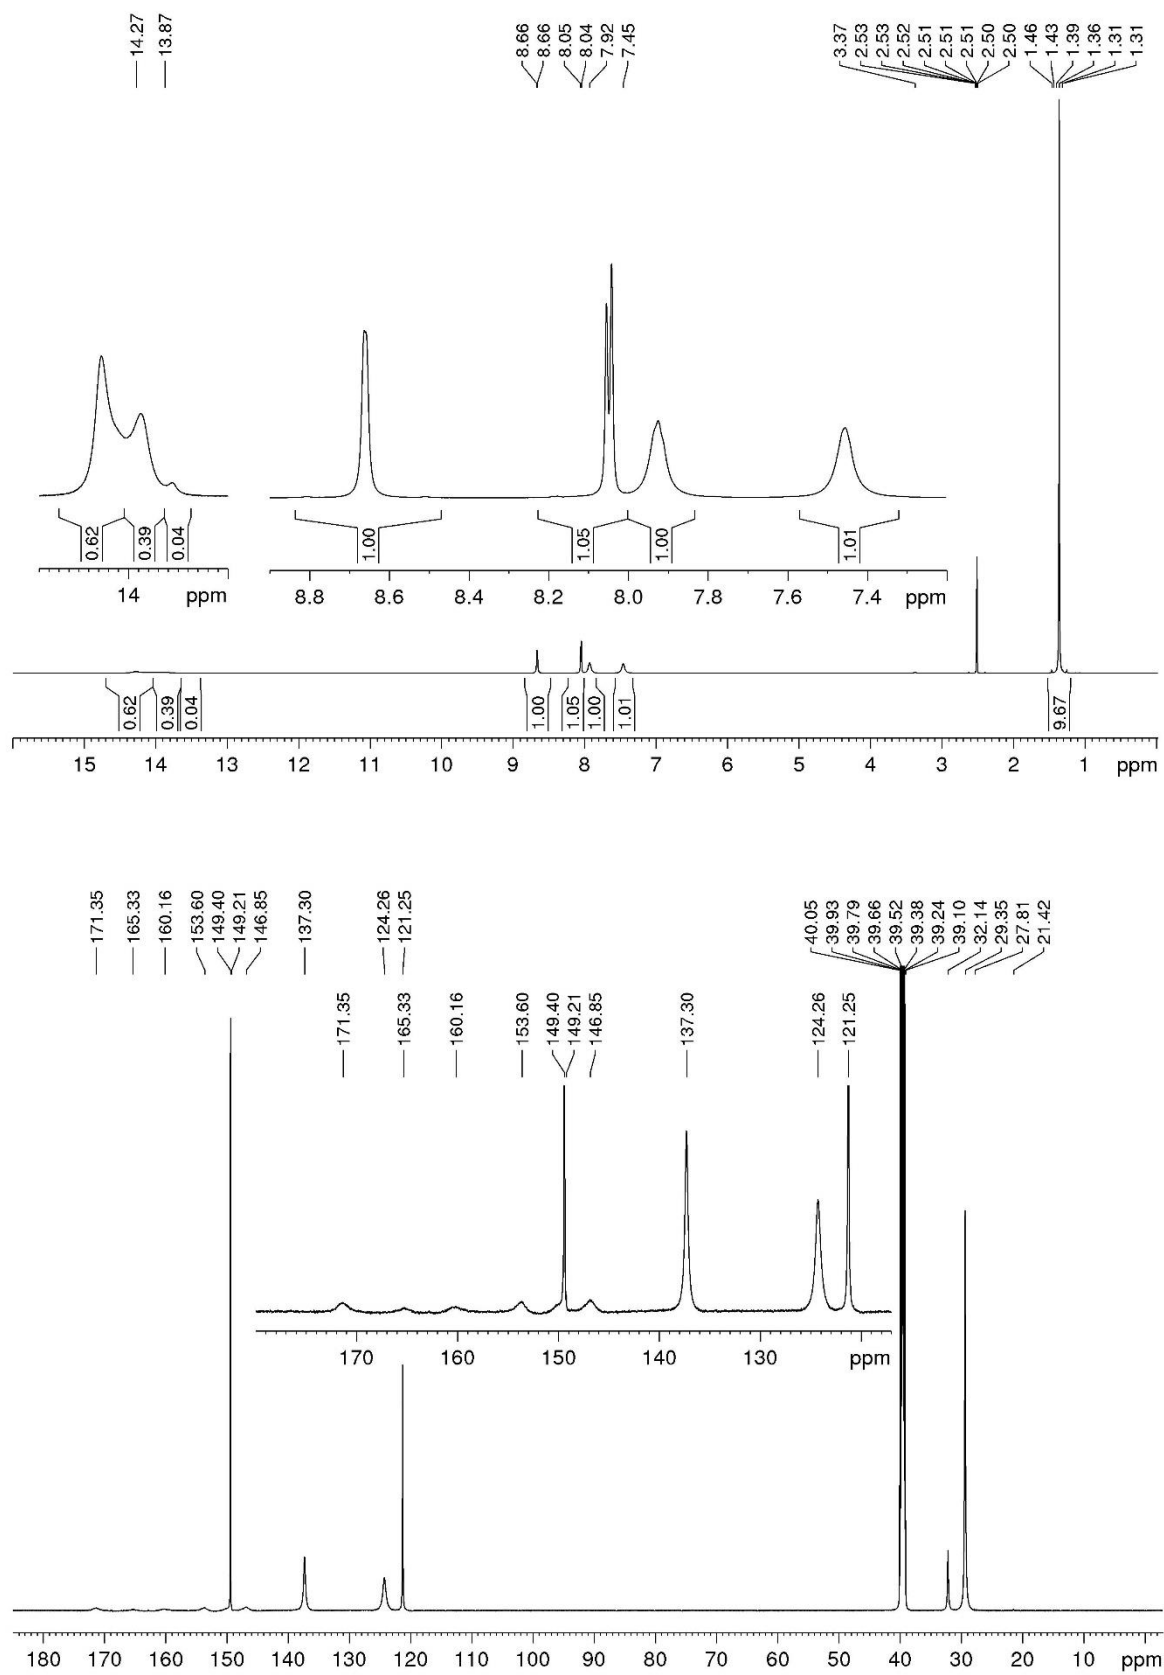

**Figure S28.** (Top) <sup>1</sup>H- (500.13 MHz) and (bottom) <sup>13</sup>C-NMR (150.9 MHz) spectra of pyridinetriazol **9g** in DMSO-*d*<sub>6</sub> at 17 °C.

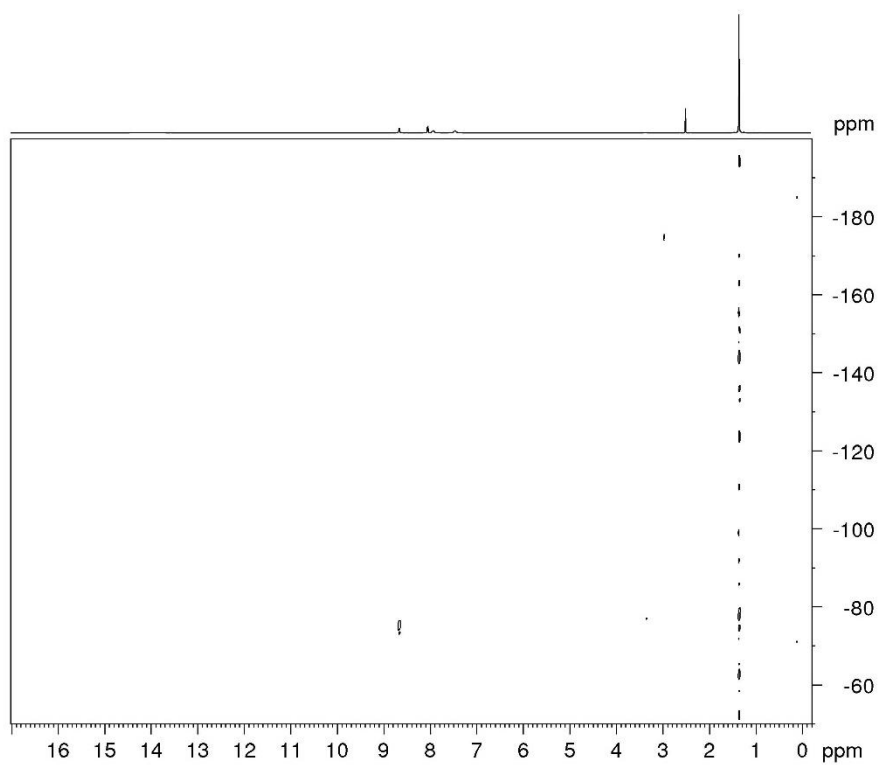

**Figure S29.**  $^1\text{H}$ ,  $^{15}\text{N}$  HMQC spectrum (500.13 MHz) of pyridinetriazol **9g** in  $\text{DMSO-}d_6$  at 17 °C.



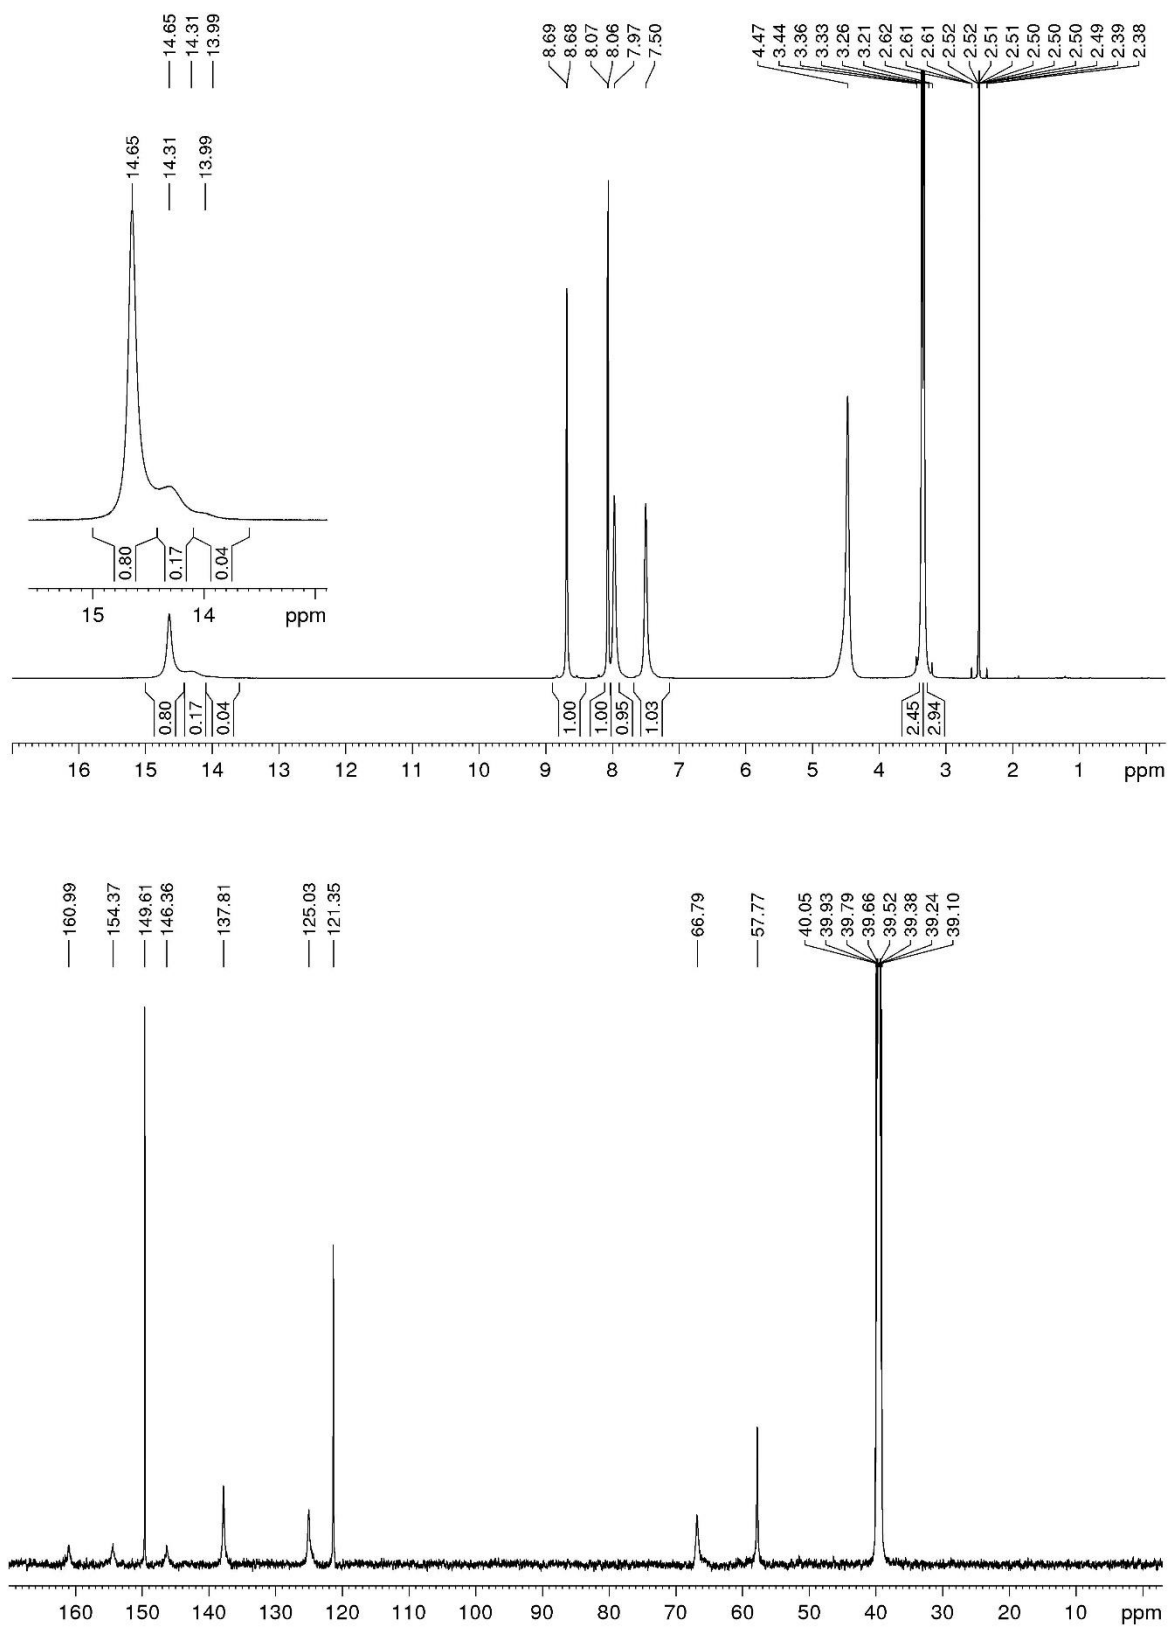

**Figure S30.** (Top) <sup>1</sup>H- (500.13 MHz) and (bottom) <sup>13</sup>C-NMR (125.76 MHz) spectra of pyridinetriazol **9h** in DMSO-*d*<sub>6</sub> at 17 °C.

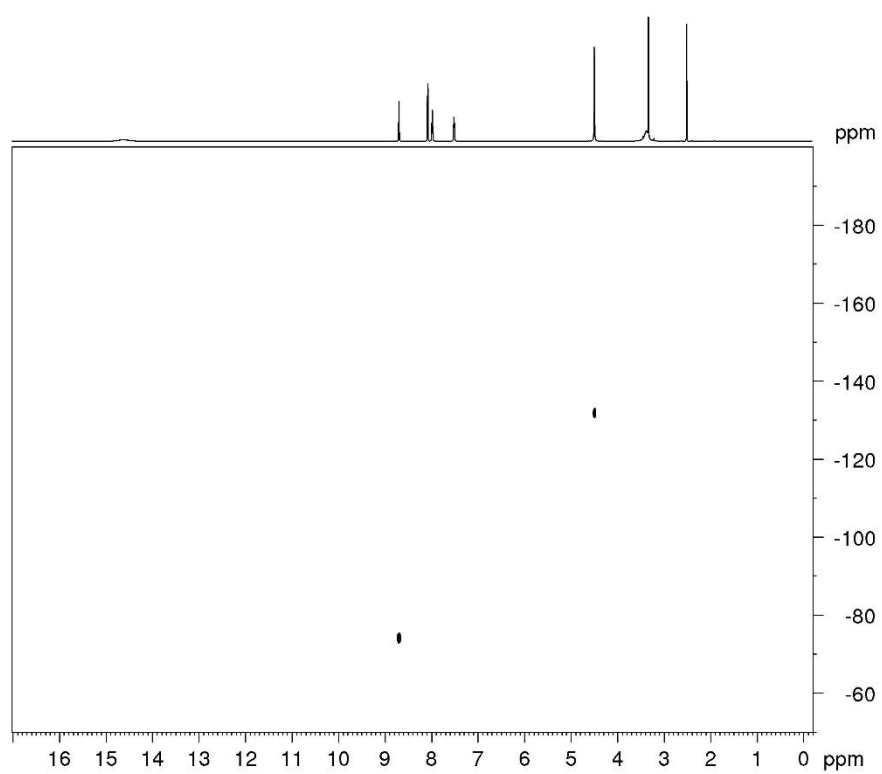

**Figure S31.**  $^1\text{H}$ ,  $^{15}\text{N}$  HMQC spectrum (500.13 MHz) of pyridinetriazol **9h** in  $\text{DMSO-}d_6$  at 17 °C.

**Table S1.** Rates of exchange ( $k$  in  $\text{s}^{-1}$ ) and activation energies ( $\Delta G^\ddagger$ , in  $\text{kcal}\cdot\text{mol}^{-1}$ ) obtained from EXSY spectra for compounds **9b**, **9c**, **9d**, **9e** and **9f** in  $\text{DMSO-}d_6$  at  $17^\circ\text{C}$ .<sup>a</sup>

|                           | <b>9b</b> |                     | <b>9c<sup>b</sup></b> |                     | <b>9c<sup>c,d</sup></b> |                     | <b>9d</b> |                     | <b>9d<sup>b</sup></b> |                     | <b>9e</b> |                     | <b>9e<sup>b,d</sup></b> |                     | <b>9f</b> |                     |
|---------------------------|-----------|---------------------|-----------------------|---------------------|-------------------------|---------------------|-----------|---------------------|-----------------------|---------------------|-----------|---------------------|-------------------------|---------------------|-----------|---------------------|
|                           | $k$       | $\Delta G^\ddagger$ | $k$                   | $\Delta G^\ddagger$ | $k$                     | $\Delta G^\ddagger$ | $k$       | $\Delta G^\ddagger$ | $k$                   | $\Delta G^\ddagger$ | $k$       | $\Delta G^\ddagger$ | $k$                     | $\Delta G^\ddagger$ | $k$       | $\Delta G^\ddagger$ |
| <b>A → B</b>              | 47.17     | 14.74               | 13.81                 | 15.47               | 31.77                   | 14.87               | 3.43      | 16.25               | 11.29                 | 15.56               | 4.93      | 16.04               | 10.28                   | 15.54               | 15.76     | 15.38               |
| <b>B → A</b>              | 27.92     | 15.04               | 26.93                 | 15.63               | 31.38                   | 15.00               | 2.69      | 16.39               | 8.79                  | 15.71               | 3.16      | 16.30               | 9.02                    | 15.67               | 9.15      | 15.70               |
| <b>A → C</b>              |           |                     |                       |                     |                         |                     | 0.08      | 18.39               | 0.50                  | 17.36               |           |                     |                         |                     |           |                     |
| <b>C → A</b>              |           |                     |                       |                     |                         |                     | 1.37      | 16.78               |                       |                     |           |                     |                         |                     |           |                     |
| <b>B → C</b>              |           |                     |                       |                     |                         |                     | 0.04      | 18.88               | 0.22                  | 17.84               |           |                     |                         |                     |           |                     |
| <b>C → B</b>              |           |                     |                       |                     |                         |                     |           |                     |                       |                     |           |                     |                         |                     |           |                     |
| <b>A → H<sub>2</sub>O</b> |           |                     |                       |                     |                         |                     | 4.13      | 16.14               |                       |                     |           |                     | 3.57                    | 16.26               | 18.79     | 15.28               |
| <b>B → H<sub>2</sub>O</b> |           |                     |                       |                     |                         |                     | 4.17      | 16.14               |                       |                     |           |                     |                         |                     | 7.68      | 15.55               |
| <b>C → H<sub>2</sub>O</b> |           |                     |                       |                     |                         |                     | 27.6      | 15.05               |                       |                     |           |                     |                         |                     |           |                     |
| <b>H<sub>2</sub>O → A</b> | 1.26      | 16.83               | 1.22                  | 17.74               |                         |                     | 0.04      | 18.88               |                       |                     | 0.29      | 17.67               | 5.03                    | 16.03               | 0.34      | 17.60               |
| <b>H<sub>2</sub>O → B</b> | 0.43      | 17.45               | 0.98                  | 17.73               |                         |                     | 0.05      | 18.73               |                       |                     | 0.26      | 17.75               |                         |                     | 0.28      | 17.70               |
| <b>H<sub>2</sub>O → C</b> |           |                     |                       |                     |                         |                     | 0.02      | 19.24               |                       |                     |           |                     |                         |                     |           |                     |

a) Proportion of water with respect to triazoles  $\geq 87\%$ . b) Average value of 2 mixing times. c) Proportion of water with respect to triazoles  $\leq 7\%$ . d) Average value of 3 mixing times.

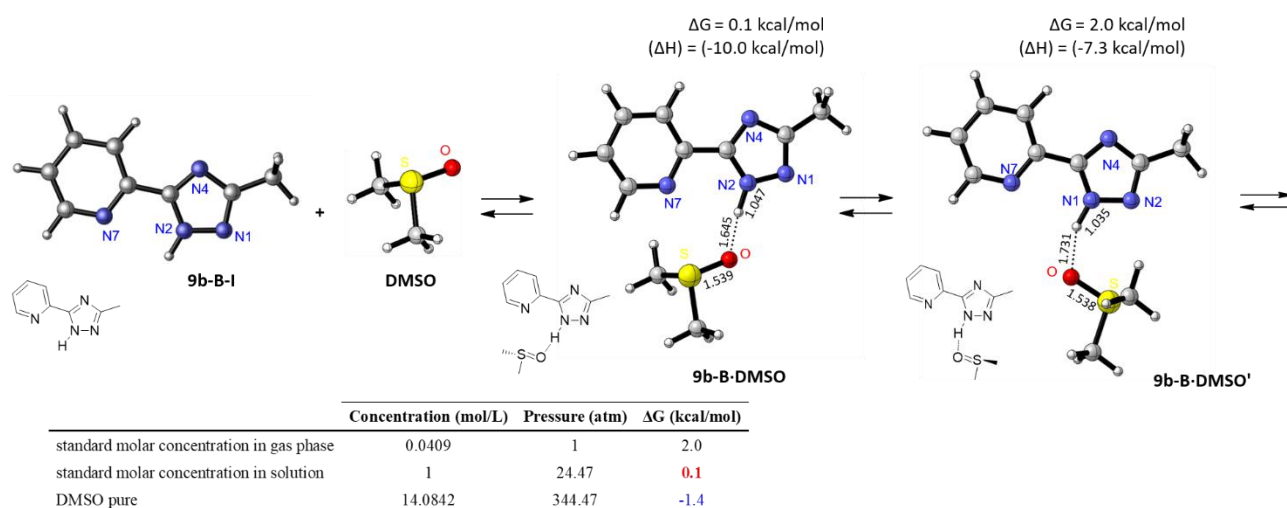

**Figure S32.** Computed explicit solvation of **9b-B** in DMSO [M06-2X/6-311+G(d,p)/SMD(DMSO)].

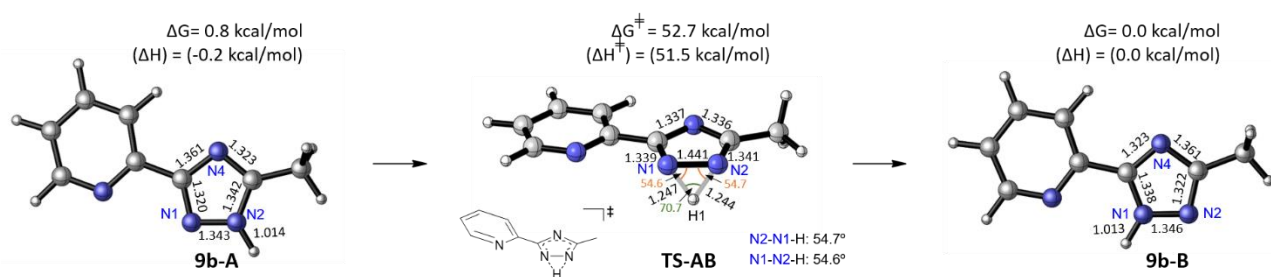

**Figure S33.** Computed 1,2-proton transfer pathway of **9b-A** to **9b-B** in DMSO [M06-2X/6-311+G(d,p)/SMD(DMSO)].

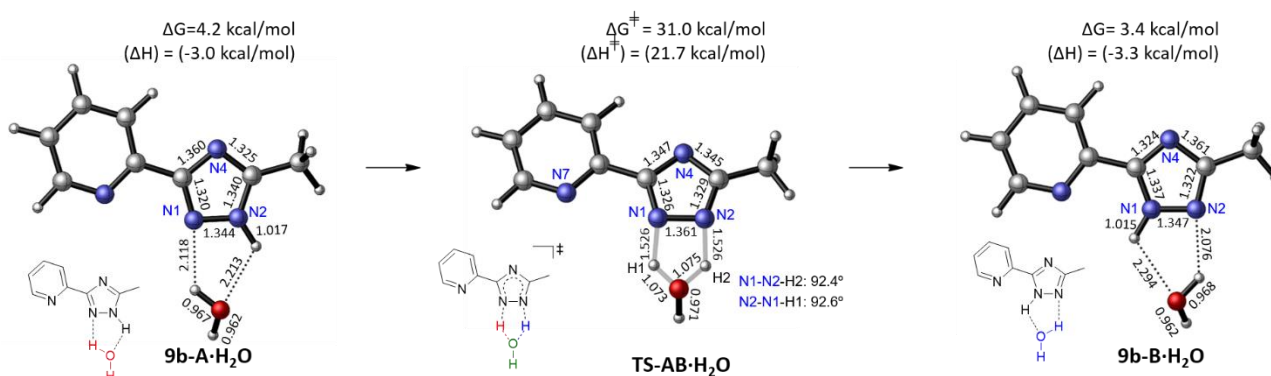

**Figure S34.** Computed 1,2-proton transfer pathway of **9b-A·H<sub>2</sub>O** to **9b-B·H<sub>2</sub>O** in DMSO [M06-2X/6-311+G(d,p)/SMD(DMSO)].

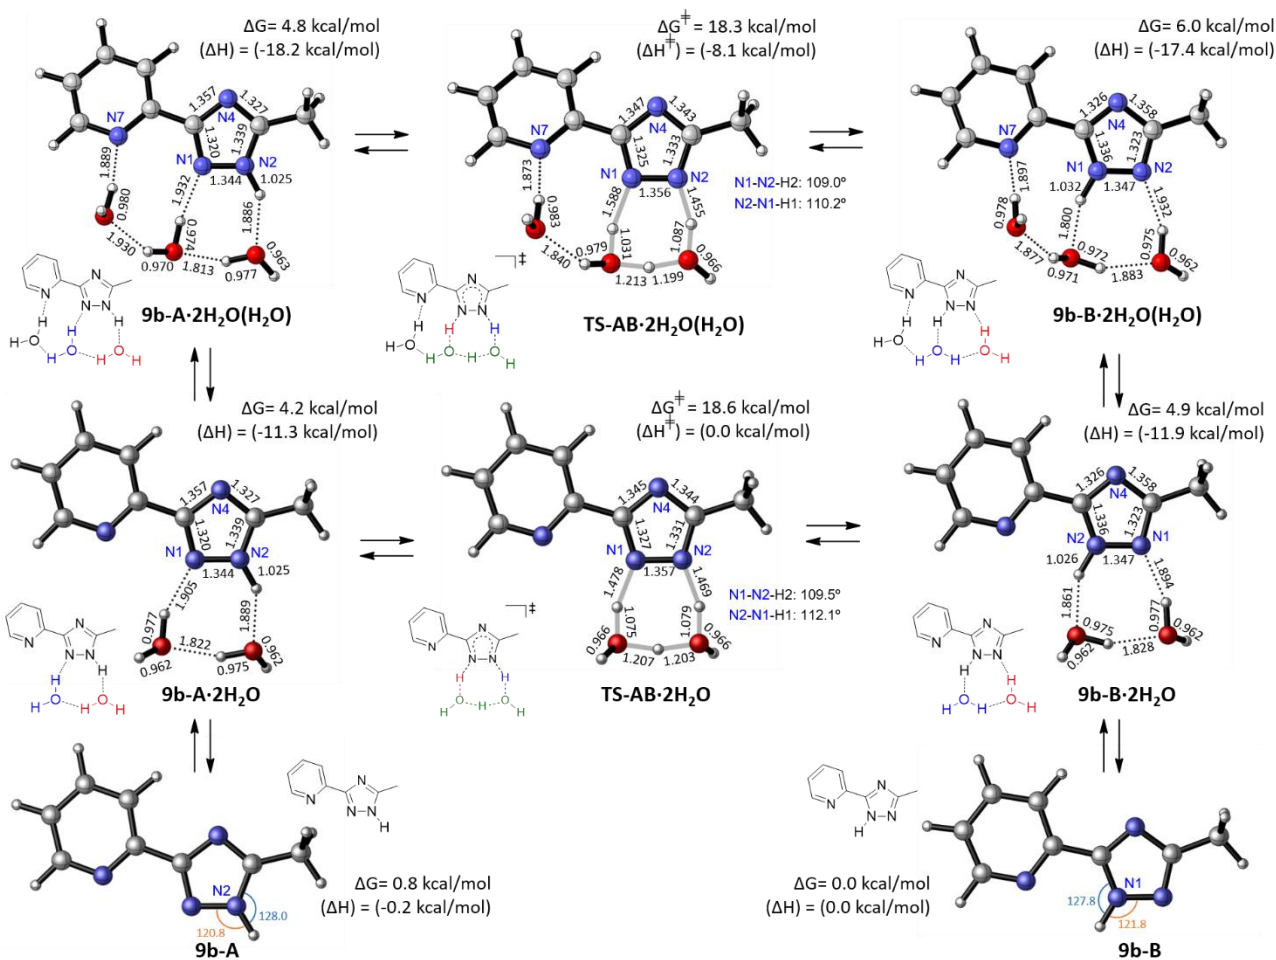

**Figure S35.** Computed 1,2-proton transfer pathway of **9b-A·2H<sub>2</sub>O** to **9b-B·2H<sub>2</sub>O** in DMSO [M06-2X/6-311+G(d,p)/SMD(DMSO)].

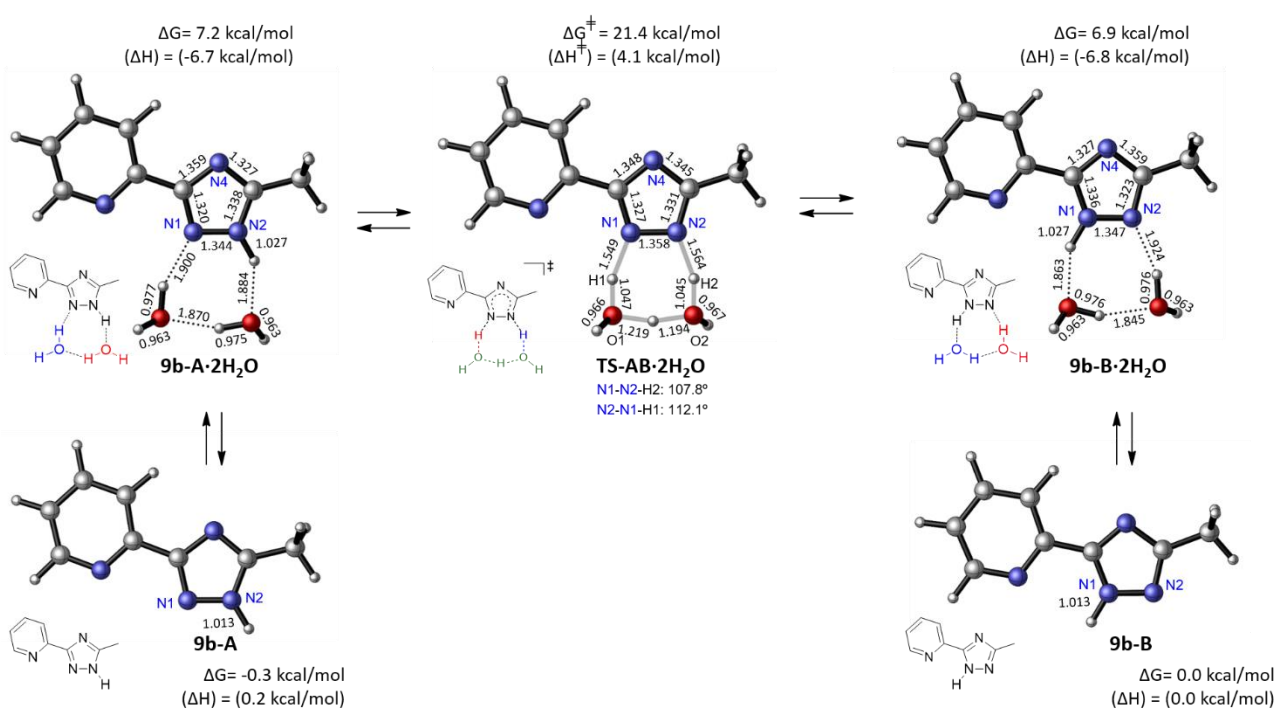

**Figure S36.** Computed 1,2-proton transfer pathway of **9b-A·2H<sub>2</sub>O** to **9b-B·2H<sub>2</sub>O** in H<sub>2</sub>O [M06-2X/6-311+G(d,p)/SMD(H<sub>2</sub>O)].

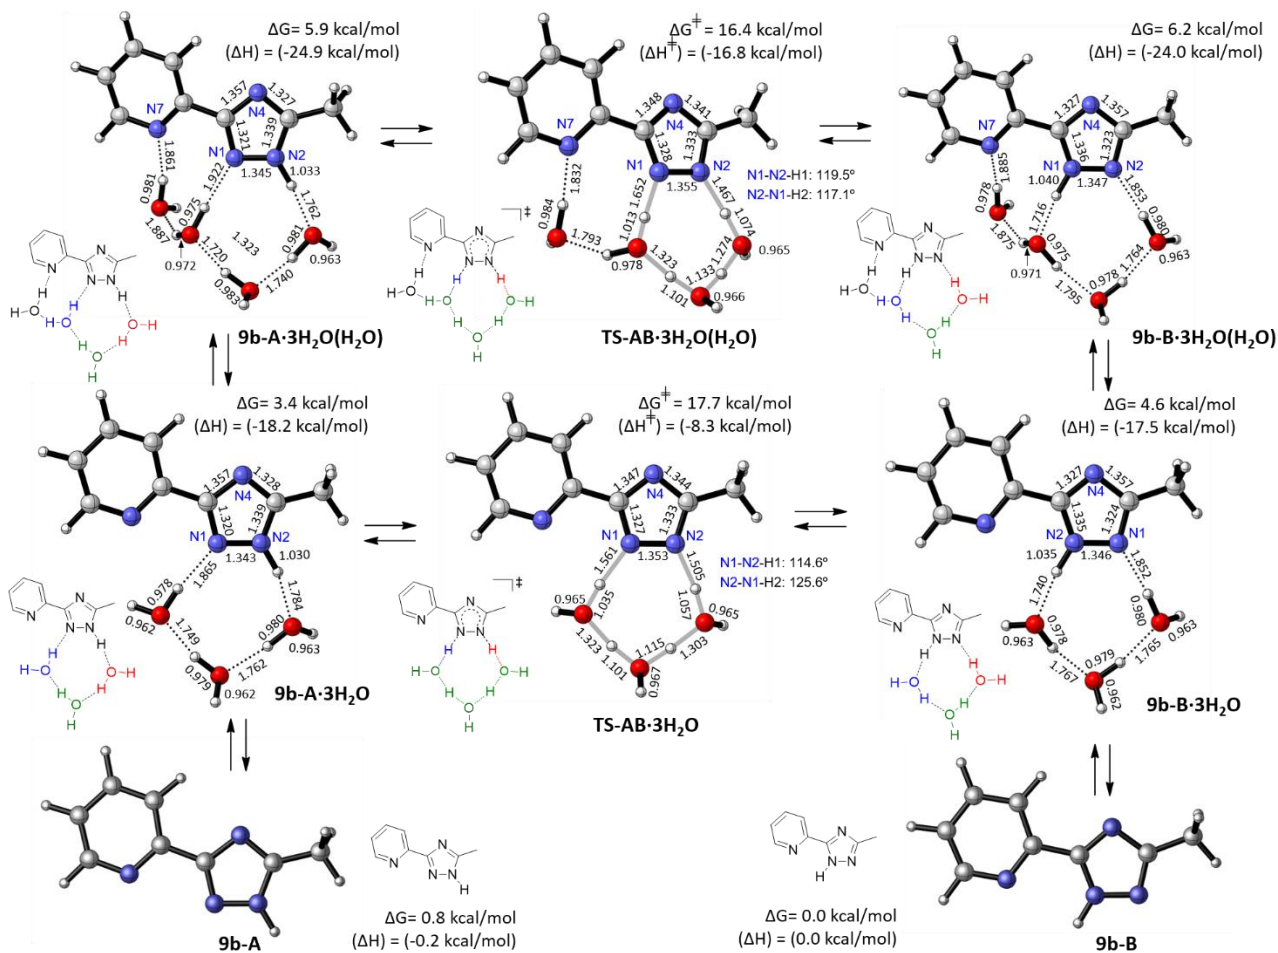

**Figure S37.** Computed 1,2-proton transfer pathway of **9b-A·3H<sub>2</sub>O/9b-A·3H<sub>2</sub>O(H<sub>2</sub>O)** to **9b-B·3H<sub>2</sub>O/9b-B·3H<sub>2</sub>O(H<sub>2</sub>O)** in DMSO [M06-2X/6-311+G(d,p)/SMD(DMSO)].

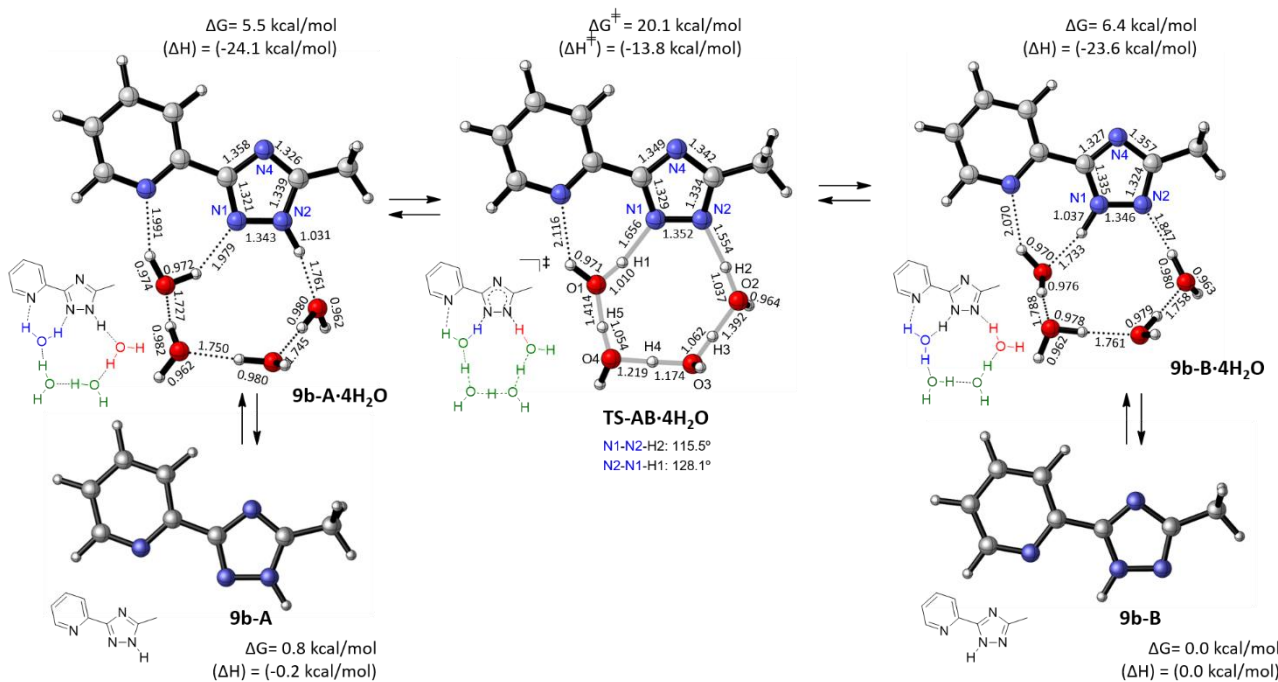

**Figure S38.** Computed 1,2-proton transfer pathway of **9b-A·4H<sub>2</sub>O** to **9b-B·4H<sub>2</sub>O** in DMSO [M06-2X/6-311+G(d,p)/SMD(DMSO)].

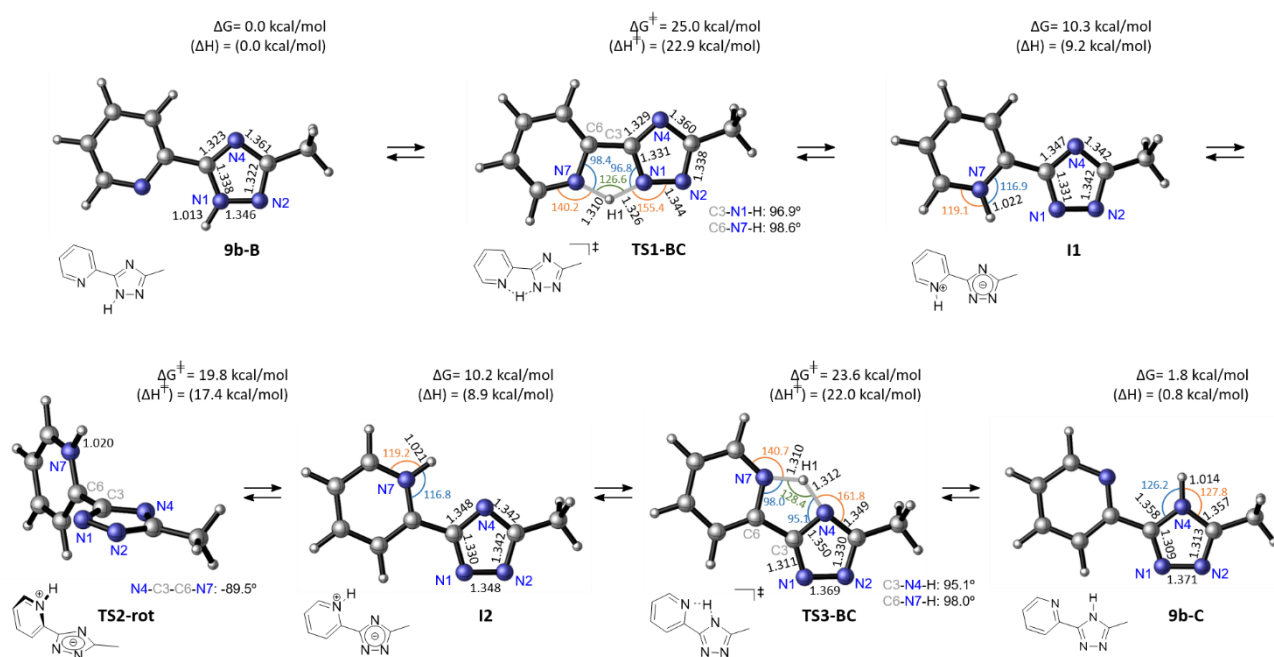

**Figure S39.** Computed proton transfer pathway of **9b-B**  $\rightleftharpoons$  **9b-C** in DMSO [M06-2X/6-311+G(d,p)/SMD(DMSO)].

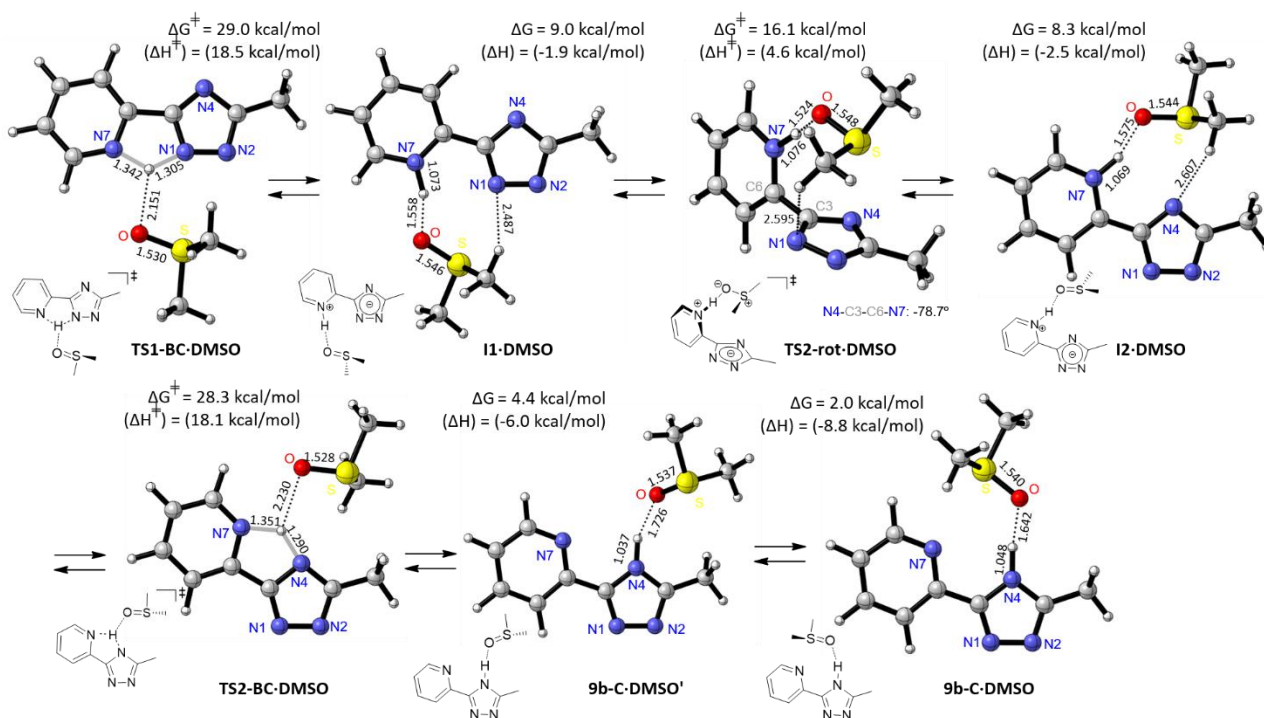

**Figure S40.** Computed proton transfer pathway of **9b-B·DMSO**  $\rightleftharpoons$  **9b-C·DMSO** in DMSO [M06-2X/6-311+G(d,p)/SMD(DMSO)].

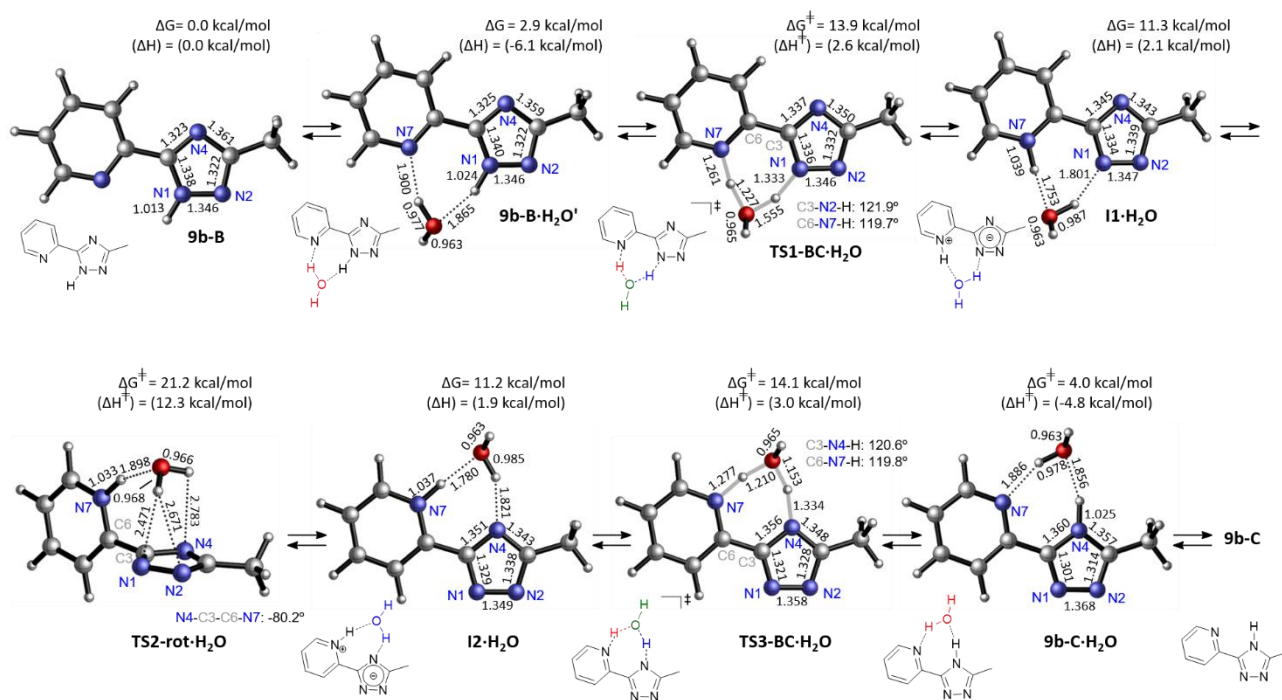

**Figure S41.** Computed proton transfer pathway of **9b-B·H<sub>2</sub>O**  $\rightleftharpoons$  **9b-C·H<sub>2</sub>O** in DMSO [M06-2X/6-311+G(d,p)/SMD(DMSO)].



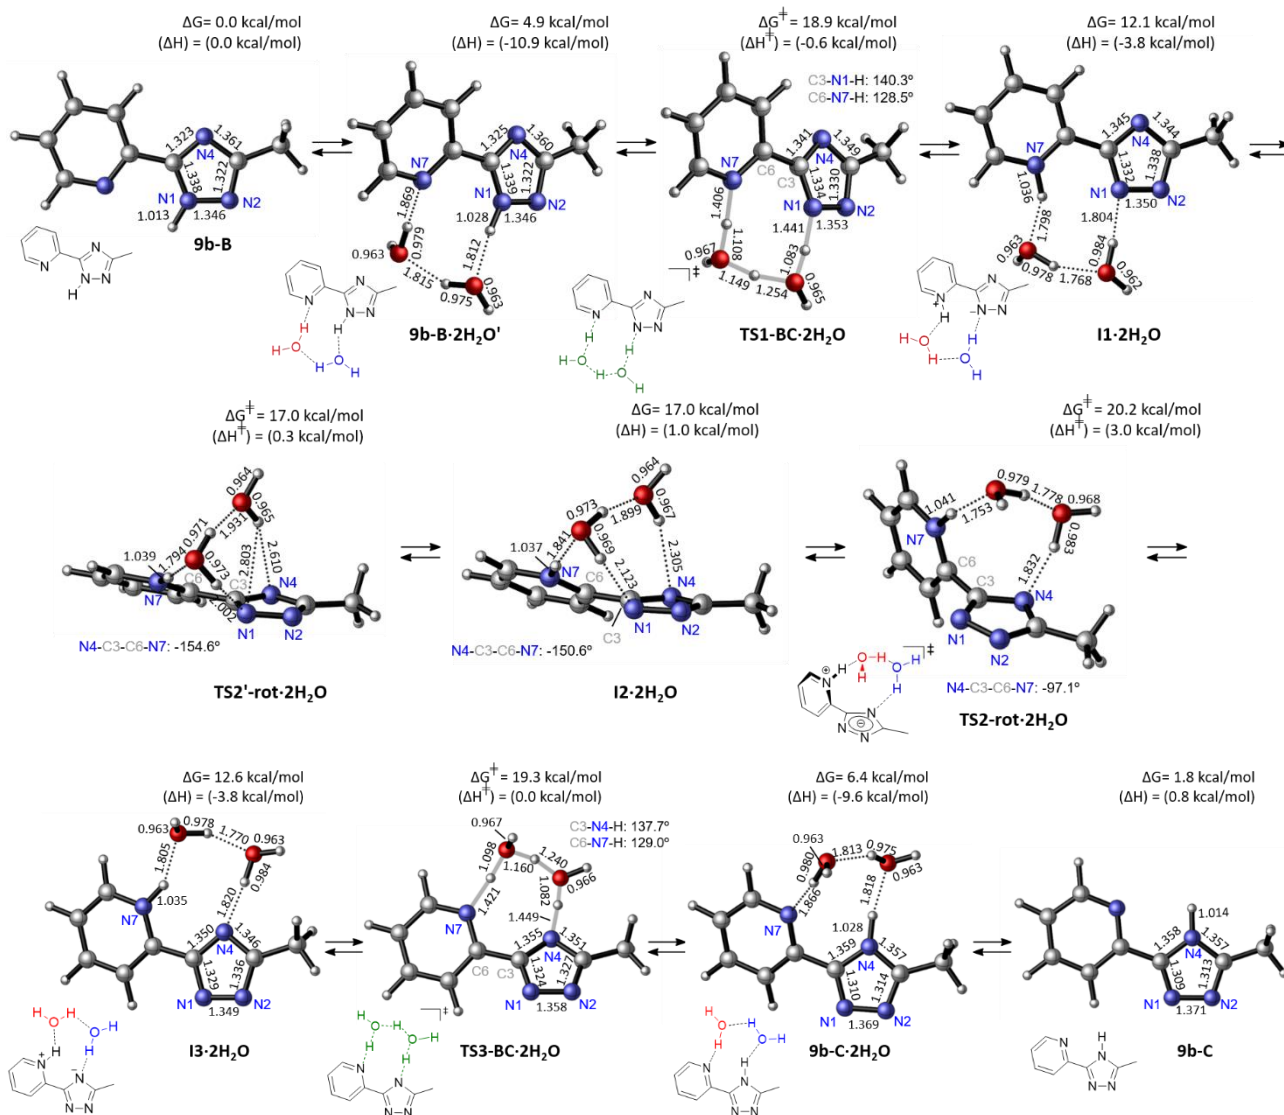

**Figure S42.** Computed proton transfer pathway of  $9b\text{-B}\cdot 2\text{H}_2\text{O} \rightleftharpoons 9b\text{-C}\cdot 2\text{H}_2\text{O}$  in DMSO [M06-2X/6-311+G(d,p)/SMD(DMSO)].

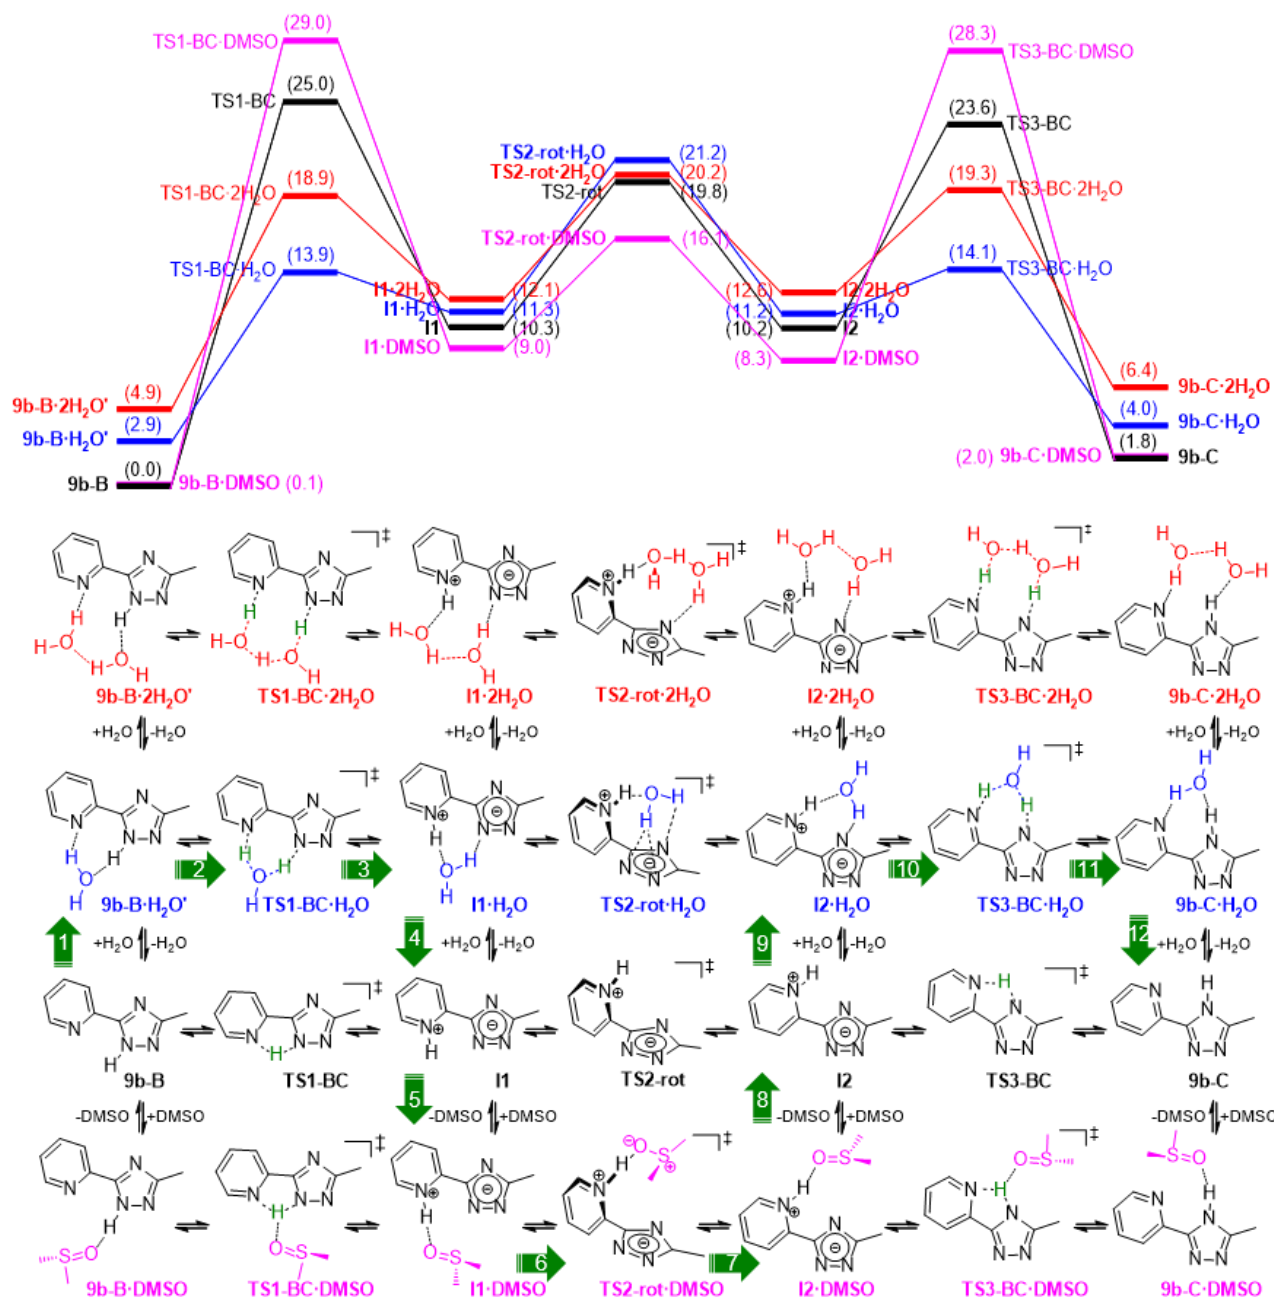

**Figure S43.** Graphical overview of the computed proton transfer pathway of  $9b\text{-B}\cdot nS \rightleftharpoons 9b\text{-C}\cdot nS$  in DMSO, S = DMSO, H<sub>2</sub>O, n = 0, 1, 2. The favored transfer pathway is highlighted using green arrows.

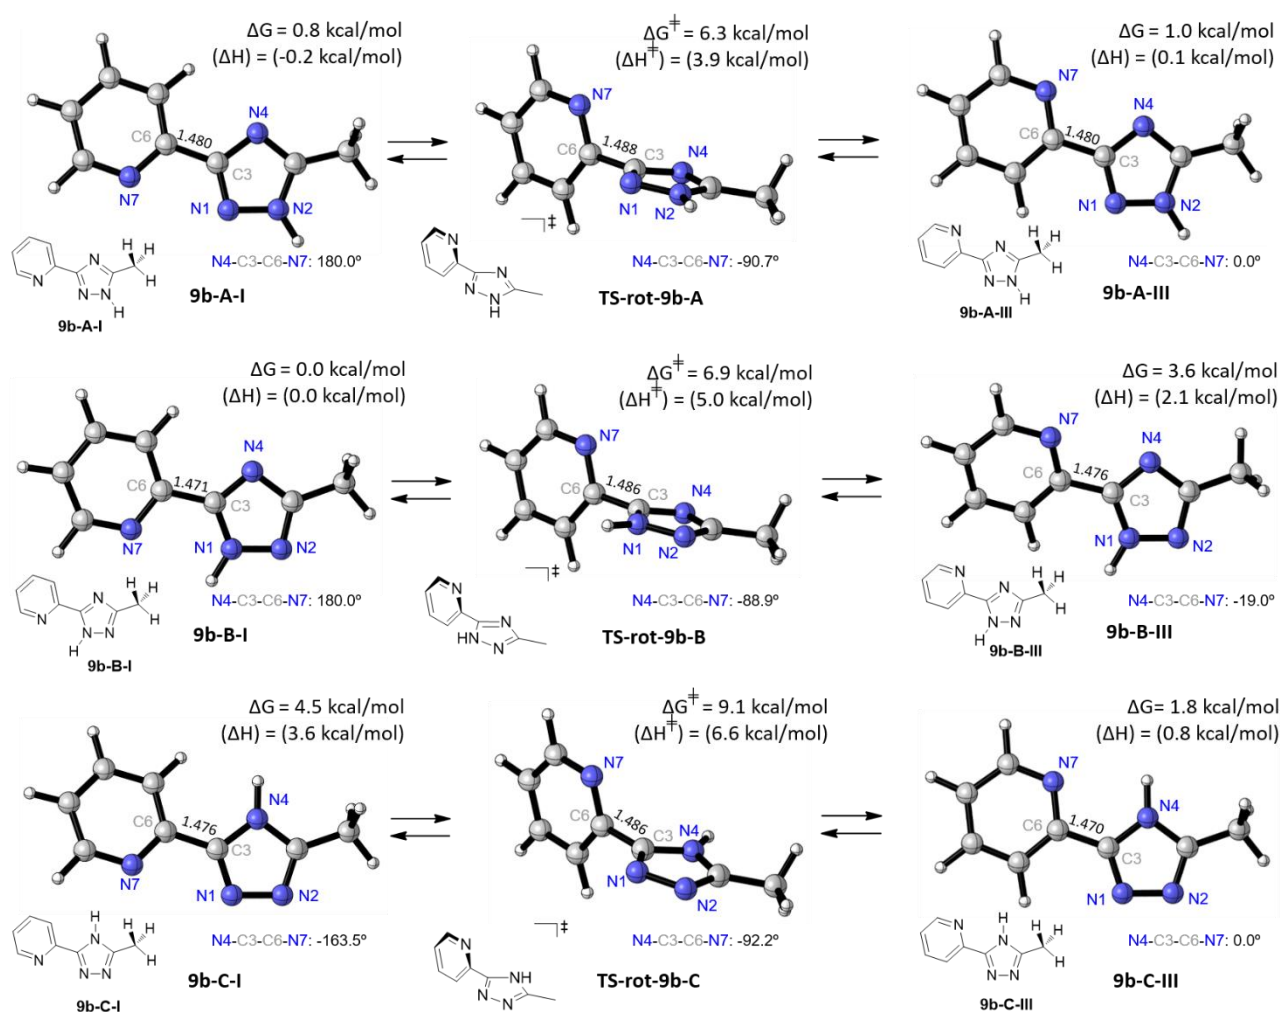

**Figure S44.** Computed rotamerization of the pyridine substituent in **9b-A,B,C** in DMSO [M06-2X/6-311+G(d,p)/SMD(DMSO)].

**Table S2.** Distribution of tautomers **9b-A**, **9b-B** and **9b-C** computed at the M06-2X/6-311+G(d,p)/SMD(DMSO) level.

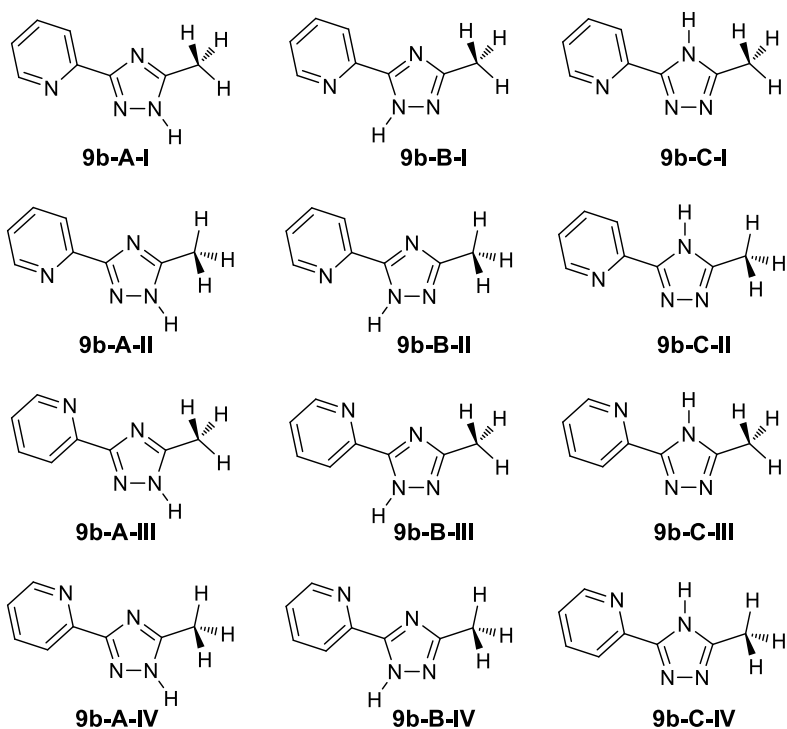

|                 | DMSO                                 |      |
|-----------------|--------------------------------------|------|
|                 | $\Delta G$ (kcal·mol <sup>-1</sup> ) | %    |
| <b>9b-B-I</b>   | 0.5                                  | 18.5 |
| <b>9b-B-II</b>  | 0.0                                  | 42.7 |
| <b>9b-B-IV</b>  | 4.7                                  | 0.0  |
| <b>9b-B-III</b> | 3.6                                  | 0.1  |
| <b>9b-C-II</b>  | 5.3                                  | 0.0  |
| <b>9b-C-I</b>   | 4.5                                  | 0.0  |
| <b>9b-C-IV</b>  | 2.3                                  | 0.8  |
| <b>9b-C-III</b> | 1.8                                  | 1.9  |
| <b>9b-A-III</b> | 1.0                                  | 8.5  |
| <b>9b-A-IV</b>  | 1.0                                  | 8.3  |
| <b>9b-A-II</b>  | 1.0                                  | 7.6  |
| <b>9b-A-I</b>   | 0.8                                  | 11.5 |

**61.4**

**2.7**

**35.9**

**Table S3.** Computed energy and thermodynamic parameters for the conformers of tautomer **9b-A**, **9b-B** and **9b-C** and the species involved in the tautomerization  $9b-A \rightleftharpoons 9b-B \rightleftharpoons 9b-C$  at the level M06-2X/6-311+G(d,p)/SMD(DMSO) (E = electronic energy, H = enthalpy, G = Gibbs free energy;  $G_{\text{correct}}$  = correction due to entropy, in Hartrees).

|                               | <b>E</b>      | <b>H</b>      | <b>G</b>      | <b>G<sub>correction</sub></b> |
|-------------------------------|---------------|---------------|---------------|-------------------------------|
| <b>9b-B-I</b>                 | -528.62061627 | -528.45229600 | -528.49889100 | -528.49587909                 |
| <b>9b-B-II</b>                | -528.61958844 | -528.45137200 | -528.49967900 | -528.49666709                 |
| <b>9b-B-IV</b>                | -528.61544729 | -528.44787500 | -528.49219600 | -528.48918409                 |
| <b>9b-B-III</b>               | -528.61643522 | -528.44796000 | -528.49387100 | -528.49085909                 |
| <b>9b-C-II</b>                | -528.61292552 | -528.44462800 | -528.49123500 | -528.48822309                 |
| <b>9b-C-I</b>                 | -528.61378591 | -528.44565900 | -528.49248100 | -528.48946909                 |
| <b>9b-C-IV</b>                | -528.61709132 | -528.44902800 | -528.49593900 | -528.49292709                 |
| <b>9b-C-III</b>               | -528.61806170 | -528.45007800 | -528.49674200 | -528.49373009                 |
| <b>9B-A-III</b>               | -528.61967049 | -528.45126400 | -528.49815700 | -528.49514509                 |
| <b>9B-A-IV</b>                | -528.61937921 | -528.45111400 | -528.49813000 | -528.49511809                 |
| <b>9B-A-II</b>                | -528.61988621 | -528.45155900 | -528.49804600 | -528.49503409                 |
| <b>9B-A-I</b>                 | -528.62015107 | -528.45172700 | -528.49843800 | -528.49542609                 |
| <b>TS-AB</b>                  | -528.53128803 | -528.36936600 | -528.41570500 | -528.41269309                 |
| <b>9b-A·H<sub>2</sub>O</b>    | -605.05607108 | -604.86032500 | -604.91562600 | -604.91261409                 |
| <b>TS-AB·H<sub>2</sub>O</b>   | -605.01124704 | -604.82095100 | -604.87290800 | -604.86989609                 |
| <b>9b-B·H<sub>2</sub>O</b>    | -605.05643821 | -604.86081100 | -604.91677300 | -604.91376109                 |
| <b>H<sub>2</sub>O</b>         | -76.42921659  | -76.40415400  | -76.42558000  | -76.42256809                  |
| <b>9b-A·2H<sub>2</sub>O</b>   | -681.50150770 | -681.27767200 | -681.33819300 | -681.33518109                 |
| <b>9b-B·2H<sub>2</sub>O</b>   | -681.50149059 | -681.27859200 | -681.33701600 | -681.33400409                 |
| <b>TS-AB·2H<sub>2</sub>O</b>  | -681.47493762 | -681.25963600 | -681.31512800 | -681.31211609                 |
| <b>9b-A·3H<sub>2</sub>O</b>   | -757.94433500 | -757.69287600 | -757.76204300 | -757.75903109                 |
| <b>9b-B·3H<sub>2</sub>O</b>   | -757.94311400 | -757.69172300 | -757.75998500 | -757.75697309                 |
| <b>TS-AB·3H<sub>2</sub>O</b>  | -757.92008100 | -757.67713000 | -757.73910600 | -757.73609409                 |
| <b>9b-A·4H<sub>2</sub>O</b>   | -834.38609600 | -834.10643700 | -834.18120500 | -834.17819309                 |
| <b>9b-B·4H<sub>2</sub>O</b>   | -834.38512300 | -834.10552000 | -834.17978700 | -834.17677509                 |
| <b>TS-AB·4H<sub>2</sub>O</b>  | -834.36024400 | -834.08997500 | -834.15796500 | -834.15495309                 |
| <b>I2</b>                     | -528.60570378 | -528.43713400 | -528.48336900 | -528.48035709                 |
| <b>I1</b>                     | -528.60517128 | -528.43673000 | -528.48332000 | -528.48030809                 |
| <b>TS1-BC</b>                 | -528.57817661 | -528.41486900 | -528.45984400 | -528.45683209                 |
| <b>TS3-BC</b>                 | -528.57925495 | -528.41625600 | -528.46211600 | -528.45910409                 |
| <b>TS2-rot</b>                | -528.59146933 | -528.42370300 | -528.46816200 | -528.46515009                 |
| <b>9b-B·H<sub>2</sub>O'</b>   | -605.06126323 | -604.86520700 | -604.91760700 | -604.91459509                 |
| <b>TS1-BC·H<sub>2</sub>O</b>  | -605.03957896 | -604.85137900 | -604.90011900 | -604.89710709                 |
| <b>I1·H<sub>2</sub>O</b>      | -605.04803864 | -604.85225100 | -604.90421100 | -604.90119909                 |
| <b>TS2-rot·H<sub>2</sub>O</b> | -605.03102539 | -604.83589300 | -604.88851000 | -604.88549809                 |
| <b>I2·H<sub>2</sub>O</b>      | -605.04838773 | -604.85244800 | -604.90435200 | -604.90134009                 |
| <b>TS3-BC·H<sub>2</sub>O</b>  | -605.03897012 | -604.85082000 | -604.89976000 | -604.89674809                 |
| <b>9b-C·H<sub>2</sub>O</b>    | -605.05891904 | -604.86321800 | -604.91592000 | -604.91290809                 |
| <b>9b-B·2H<sub>2</sub>O'</b>  | -681.50078967 | -681.27704800 | -681.33693500 | -681.33392309                 |
| <b>TS1-BC·2H<sub>2</sub>O</b> | -681.47566930 | -681.26056700 | -681.31474400 | -681.31173209                 |
| <b>I1·2H<sub>2</sub>O</b>     | -681.48929451 | -681.26571000 | -681.32547700 | -681.32246509                 |

**Table S3, continuation.** Computed energy and thermodynamic parameters for the conformers of tautomer **9b-A**, **9b-B** and **9b-C** and the species involved in the tautomerization **9b-A**  $\rightleftharpoons$  **9b-B**  $\rightleftharpoons$  **9b-C** at the level M06-2X/6-311+G(d,p)/SMD(DMSO) (E = electronic energy, H = enthalpy, G = Gibbs free energy;  $G_{\text{correct}}$  = correction due to entropy, in Hartrees).

|                                              | <b>E</b>       | <b>H</b>       | <b>G</b>       | <b>G<sub>correct</sub></b> |
|----------------------------------------------|----------------|----------------|----------------|----------------------------|
| <b>TS2'-rot·2H<sub>2</sub>O</b>              | -681.48187983  | -681.25916700  | -681.31768600  | -681.31467409              |
| <b>I2·2H<sub>2</sub>O</b>                    | -681.48198531  | -681.25801200  | -681.31760700  | -681.31459509              |
| <b>TS2-rot·2H<sub>2</sub>O</b>               | -681.47749013  | -681.25482700  | -681.31259400  | -681.30958209              |
| <b>I3·2H<sub>2</sub>O</b>                    | -681.48953204  | -681.26577500  | -681.32476800  | -681.32175609              |
| <b>TS3-BC·H<sub>2</sub>O</b>                 | -681.47472831  | -681.25962800  | -681.31405400  | -681.31104209              |
| <b>9b-C·H<sub>2</sub>O</b>                   | -681.49853141  | -681.27496200  | -681.33456800  | -681.33155609              |
| <b>9b-B-I·DMSO</b>                           | -1081.80153300 | -1081.54512100 | -1081.60868500 | -1081.60567309             |
| <b>DMSO</b>                                  | -553.16423300  | -553.07781500  | -553.11223700  | -553.10922509              |
| <b>9b-B-I·DMSO'</b>                          | -1081.79738000 | -1081.54081600 | -1081.60577800 | -1081.60276609             |
| <b>TS1-BC·DMSO</b>                           | -1081.75116200 | -1081.49970200 | -1081.56263300 | -1081.55962109             |
| <b>I1·DMSO</b>                               | -1081.78821900 | -1081.53229200 | -1081.59454400 | -1081.59153209             |
| <b>TS2-rot·DMSO</b>                          | -1081.77676300 | -1081.52194300 | -1081.58326100 | -1081.58024909             |
| <b>I2·DMSO</b>                               | -1081.78900900 | -1081.5332500  | -1081.59564500 | -1081.59263309             |
| <b>TS2-BC·DMSO</b>                           | -1081.75190600 | -1081.50028500 | -1081.56377500 | -1081.56076309             |
| <b>9b-C·DMSO'</b>                            | -1081.79522700 | -1081.5387100  | -1081.60186900 | -1081.59885709             |
| <b>9b-C·DMSO</b>                             | -1081.79946600 | -1081.54320500 | -1081.60572800 | -1081.60271609             |
| <b>9b-B·2H<sub>2</sub>O(H<sub>2</sub>O)</b>  | -757.94364400  | -757.69161600  | -757.75775500  | -757.75474309              |
| <b>TS-AB·2H<sub>2</sub>O(H<sub>2</sub>O)</b> | -757.92098100  | -757.67679200  | -757.73821600  | -757.73520409              |
| <b>9b-A·2H<sub>2</sub>O(H<sub>2</sub>O)</b>  | -757.94487500  | -757.69276200  | -757.75976900  | -757.75675709              |
| <b>9b-B·3H<sub>2</sub>O(H<sub>2</sub>O)</b>  | -834.38586100  | -834.10622700  | -834.18013200  | -834.17712009              |
| <b>TS-AB·3H<sub>2</sub>O(H<sub>2</sub>O)</b> | -834.36560400  | -834.09474800  | -834.16381500  | -834.16080309              |
| <b>9b-A·3H<sub>2</sub>O(H<sub>2</sub>O)</b>  | -834.38751900  | -834.10771700  | -834.18055200  | -834.17754009              |
| <b>TS-rot-9b-A</b>                           | -528.612582    | -528.445081    | -528.489687    | -528.48667509              |
| <b>TS-rot-9b-B</b>                           | -528.610689    | -528.44345     | -528.488635    | -528.48562309              |
| <b>TS-rot-9b-C</b>                           | -528.607985    | -528.440921    | -528.48513     | -528.48211809              |
| <b>9b-B-I·DMSO'</b>                          | -1081.79738000 | -1081.54081600 | -1081.60577800 | -1081.60276609             |

**Table S4.** Computed energy and thermodynamic parameters for the conformers of tautomer **9b-A**, and **9b-B** and the species involved in the tautomerization **9b-A**  $\rightleftharpoons$  **9b-B** at the level M06-2X/6-311+G(d,p)/SMD(H<sub>2</sub>O) (E = electronic energy, H = enthalpy, G = Gibbs free energy;  $G_{\text{correct}}$  = correction due to entropy, in Hartrees).

|                              | <b>E</b>      | <b>H</b>      | <b>G</b>      | <b>G<sub>correct</sub></b> |
|------------------------------|---------------|---------------|---------------|----------------------------|
| <b>9b-B-I</b>                | -528.62101000 | -528.45267700 | -528.49867600 | -528.49566409              |
| <b>9b-A-I</b>                | -528.62073600 | -528.45238000 | -528.49915200 | -528.49614009              |
| <b>H<sub>2</sub>O</b>        | -76.43468700  | -76.40962300  | -76.43105200  | -76.42804009               |
| <b>9b-A·2H<sub>2</sub>O</b>  | -681.50615800 | -681.28264800 | -681.34328900 | -681.34027709              |
| <b>9b-B·2H<sub>2</sub>O</b>  | -681.50613600 | -681.28269400 | -681.34381600 | -681.34080409              |
| <b>TS-AB·2H<sub>2</sub>O</b> | -681.48157217 | -681.26537600 | -681.32057700 | -681.31756509              |

**Cartesian coordinates and total energies (hartrees) the optimized stationary points. Imaginary frequencies of transition structures are in  $\text{cm}^{-1}$ .**

**9b-A-I**

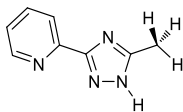

M06-2X/6-311+G(d,p)/SMD(DMSO)

Cartesian coordinates

| ATOM | X           | Y           | Z           |
|------|-------------|-------------|-------------|
| C    | -2.62657000 | 0.23923000  | 0.00008500  |
| C    | -0.57022700 | -0.23815800 | 0.00006000  |
| N    | -1.15796800 | -1.41953600 | -0.00047200 |
| N    | -2.46054300 | -1.09233100 | -0.00042300 |
| N    | -1.43481100 | 0.81332200  | 0.00042900  |
| C    | -3.95158200 | 0.91346600  | 0.00024100  |
| H    | -4.05110900 | 1.54455100  | 0.88448700  |
| H    | -4.05040000 | 1.54625400  | -0.88286500 |
| H    | -4.75491100 | 0.17678500  | -0.00076300 |
| C    | 0.89771400  | -0.06131800 | 0.00009600  |
| C    | 1.43898400  | 1.22424700  | -0.00027100 |
| C    | 2.82060900  | 1.36197300  | -0.00034200 |
| H    | 0.78459700  | 2.08621100  | -0.00051300 |
| C    | 2.97384300  | -1.01974400 | 0.00033900  |
| C    | 3.60912200  | 0.21857300  | -0.00004300 |
| H    | 3.27239200  | 2.34712500  | -0.00063900 |
| H    | 3.55830800  | -1.93456900 | 0.00059500  |
| H    | 4.69039100  | 0.27557100  | -0.00010000 |
| N    | 1.64979200  | -1.16733300 | 0.00041300  |
| H    | -3.17591000 | -1.81039800 | -0.00082100 |

M06-2X/6-311+G(d,p)/SMD(H<sub>2</sub>O)

Cartesian coordinates

| ATOM | X           | Y           | Z           |
|------|-------------|-------------|-------------|
| C    | 0.57183300  | -0.23221100 | -0.00007900 |
| C    | 2.62706700  | 0.24018100  | 0.00008800  |
| N    | 2.45753700  | -1.08957200 | -0.00031900 |
| H    | 3.17481700  | -1.80542200 | -0.00040800 |
| N    | 1.15498200  | -1.41521200 | -0.00039700 |
| N    | 1.43725200  | 0.81993400  | 0.00022100  |
| C    | -0.89447300 | -0.05925000 | -0.00006400 |
| C    | -1.44261900 | 1.22320500  | -0.00032800 |
| C    | -2.82431000 | 1.35863000  | -0.00022500 |
| H    | -0.79675700 | 2.09047600  | -0.00059600 |
| C    | -2.97081000 | -1.02043000 | 0.00034200  |
| C    | -3.61016100 | 0.21413300  | 0.00012100  |
| H    | -3.27677100 | 2.34312700  | -0.00041500 |
| H    | -3.55275800 | -1.93600800 | 0.00058000  |
| H    | -4.69127800 | 0.26728500  | 0.00023100  |
| N    | -1.64569300 | -1.16793600 | 0.00025400  |
| C    | 3.95324900  | 0.90481900  | 0.00032200  |
| H    | 4.05153100  | 1.53510300  | 0.88520800  |
| H    | 4.75262000  | 0.16444900  | -0.00009200 |
| H    | 4.05138800  | 1.53603600  | -0.88390200 |

B3LYP /6-311+G(2d,p)/SMD(DMSO)

Cartesian coordinates

| ATOM | X          | Y           | Z          |
|------|------------|-------------|------------|
| C    | 2.63536800 | 0.23882100  | 0.00001500 |
| C    | 0.56745600 | -0.23930400 | 0.00000000 |
| N    | 1.16030200 | -1.42595700 | 0.00001900 |
| N    | 2.47149500 | -1.09504900 | 0.00003100 |
| N    | 1.43951500 | 0.81129700  | 0.00000100 |
| C    | 3.95728800 | 0.91877400  | 0.00001800 |

|   |             |             |             |
|---|-------------|-------------|-------------|
| H | 4.76741600  | 0.18910400  | 0.00002200  |
| H | 4.06010400  | 1.55401400  | -0.88203500 |
| H | 4.06010000  | 1.55401800  | 0.88206800  |
| C | -0.89648600 | -0.06096100 | -0.00001100 |
| C | -1.44502200 | 1.22373700  | 0.00002200  |
| C | -2.82583600 | 1.36219600  | 0.00001700  |
| H | -0.79561400 | 2.08833100  | 0.00005400  |
| C | -2.98230900 | -1.01816000 | -0.00005500 |
| C | -3.61630000 | 0.22016200  | -0.00002200 |
| H | -3.27609900 | 2.34769600  | 0.00004300  |
| H | -3.56779500 | -1.93241000 | -0.00008600 |
| H | -4.69738900 | 0.27976100  | -0.00002800 |
| N | -1.65705100 | -1.16721000 | -0.00005000 |
| H | 3.18450500  | -1.81367300 | 0.00004800  |

**9b-A-II**

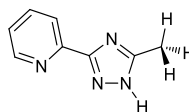

M06-2X/6-311+G(d,p)/SMD(DMSO)

Cartesian coordinates

| ATOM | X           | Y           | Z           |
|------|-------------|-------------|-------------|
| C    | -2.62641400 | 0.24142600  | 0.00005400  |
| C    | -0.56971100 | -0.23893700 | -0.00001200 |
| N    | -1.15824600 | -1.41906600 | -0.00029700 |
| N    | -2.46106100 | -1.09142800 | -0.00024300 |
| N    | -1.43439700 | 0.81392300  | 0.00021900  |
| C    | -3.95263400 | 0.91319800  | 0.00019600  |
| H    | -4.52671000 | 0.63116000  | -0.88436200 |
| H    | -4.52665700 | 0.63086100  | 0.88469400  |
| H    | -3.80689700 | 1.99192900  | 0.00036900  |
| C    | 0.89794200  | -0.06200700 | 0.00002000  |
| C    | 1.43886200  | 1.22379000  | -0.00017600 |
| C    | 2.82040700  | 1.36198300  | -0.00017700 |
| H    | 0.78419900  | 2.08555700  | -0.00032500 |
| C    | 2.97440800  | -1.01965100 | 0.00020800  |
| C    | 3.60932500  | 0.21884400  | 0.00001300  |
| H    | 3.27182000  | 2.34731200  | -0.00032900 |
| H    | 3.55919600  | -1.93427100 | 0.00037000  |
| H    | 4.69057100  | 0.27620900  | 0.00001400  |
| N    | 1.65039700  | -1.16777100 | 0.00021600  |
| H    | -3.17549200 | -1.81024400 | -0.00045500 |

B3LYP /6-311+G(2d,p)/SMD(DMSO)

Cartesian coordinates

| ATOM | X           | Y           | Z           |
|------|-------------|-------------|-------------|
| C    | 2.63544900  | 0.24022900  | 0.00001600  |
| C    | 0.56689600  | -0.24117700 | 0.00000000  |
| N    | 1.16086800  | -1.42606000 | 0.00001700  |
| N    | 2.47248900  | -1.09515800 | 0.00002900  |
| N    | 1.43952600  | 0.81095600  | 0.00000200  |
| C    | 3.95686300  | 0.92096200  | 0.00001700  |
| H    | 3.81045100  | 1.99989000  | 0.00002900  |
| H    | 4.53859900  | 0.64533900  | 0.88277100  |
| H    | 4.53859100  | 0.64535700  | -0.88274700 |
| C    | -0.89666300 | -0.06215800 | -0.00001000 |
| C    | -1.44428300 | 1.22305500  | 0.00001900  |
| C    | -2.82493800 | 1.36266500  | 0.00001300  |
| H    | -0.79423300 | 2.08715400  | 0.00004600  |
| C    | -2.98338600 | -1.01751200 | -0.00005000 |
| C    | -3.61640100 | 0.22130400  | -0.00002100 |
| H    | -3.27430200 | 2.34858400  | 0.00003700  |

|   |             |             |             |
|---|-------------|-------------|-------------|
| H | -3.56966200 | -1.93125900 | -0.00007800 |
| H | -4.69743500 | 0.28182900  | -0.00002600 |
| N | -1.65823700 | -1.16776900 | -0.00004500 |
| H | 3.18424900  | -1.81488100 | 0.00004500  |

### 9b-A-III

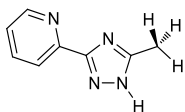

M06-2X/6-311+G(d,p)/SMD(DMSO)

Cartesian coordinates

| ATOM | X           | Y           | Z           |
|------|-------------|-------------|-------------|
| C    | 2.63578700  | -0.24135600 | 0.00000300  |
| C    | 0.57326900  | 0.19962100  | 0.00000200  |
| N    | 1.14287400  | 1.39115600  | -0.00001700 |
| N    | 2.45001200  | 1.08789200  | -0.00000800 |
| N    | 1.45407600  | -0.83655200 | 0.00001000  |
| C    | 3.97255900  | -0.89190300 | 0.00000800  |
| H    | 4.08316900  | -1.52196600 | 0.88369600  |
| H    | 4.08316700  | -1.52198200 | -0.88367000 |
| H    | 4.76233600  | -0.14072300 | 0.00000000  |
| C    | -0.89780100 | 0.04024200  | 0.00000300  |
| C    | -1.72730500 | 1.16417500  | 0.00000900  |
| C    | -3.10096700 | 0.97430700  | 0.00000600  |
| H    | -1.29763100 | 2.15775800  | 0.00001600  |
| C    | -2.69397900 | -1.37655800 | -0.00000700 |
| C    | -3.60089000 | -0.32322100 | -0.00000200 |
| H    | -3.77110800 | 1.82615000  | 0.00001100  |
| H    | -3.04630600 | -2.40331100 | -0.00001300 |
| H    | -4.66557400 | -0.52021000 | -0.00000500 |
| N    | -1.37065400 | -1.20891700 | -0.00000500 |
| H    | 3.15375300  | 1.81738800  | -0.00001700 |

### 9b-A-IV

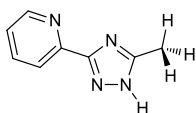

M06-2X/6-311+G(d,p)/SMD(DMSO)

Cartesian coordinates

| ATOM | X           | Y           | Z           |
|------|-------------|-------------|-------------|
| C    | -2.63570600 | -0.24340900 | -0.00000600 |
| C    | -0.57269700 | 0.20161200  | 0.00000500  |
| N    | -1.14383700 | 1.39135500  | 0.00003000  |
| N    | -2.45125600 | 1.08731700  | 0.00002100  |
| N    | -1.45353900 | -0.83636500 | -0.00001900 |
| C    | -3.97289100 | -0.89315400 | -0.00002100 |
| H    | -4.54187100 | -0.60137800 | 0.88463900  |
| H    | -4.54191400 | -0.60124200 | -0.88460700 |
| H    | -3.84515800 | -1.97415900 | -0.00010300 |
| C    | 0.89808500  | 0.04166500  | 0.00000000  |
| C    | 1.72875900  | 1.16480400  | -0.00002200 |
| C    | 3.10219600  | 0.97352900  | -0.00002200 |
| H    | 1.30017900  | 2.15887300  | -0.00004100 |
| C    | 2.69310800  | -1.37688100 | 0.00001800  |
| C    | 3.60101400  | -0.32449000 | -0.00000100 |
| H    | 3.77319200  | 1.82470000  | -0.00003800 |
| H    | 3.04432100  | -2.40402600 | 0.00003400  |
| H    | 4.66551100  | -0.52247700 | 0.00000000  |
| N    | 1.36992900  | -1.20793800 | 0.00002000  |
| H    | -3.15454900 | 1.81707500  | 0.00005200  |

### 9b-B-I

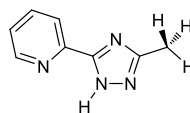

M06-2X/6-311+G(d,p)/SMD(DMSO)

Cartesian coordinates

| ATOM | X           | Y           | Z           |
|------|-------------|-------------|-------------|
| C    | 2.66866600  | 0.16668200  | 0.00003900  |
| C    | 0.57996700  | -0.12816000 | -0.00004600 |
| N    | 1.19736200  | -1.31545500 | 0.00006400  |
| H    | 0.77475500  | -2.23633800 | 0.00015600  |
| N    | 2.53254700  | -1.14836800 | -0.00026800 |
| N    | 1.48428300  | 0.83780600  | -0.00014300 |
| C    | 3.99404800  | 0.84713300  | 0.00013700  |
| H    | 4.79487700  | 0.10835900  | -0.00009900 |
| H    | 4.09790000  | 1.48161100  | -0.88209200 |
| H    | 4.09801700  | 1.48117100  | 0.88267100  |
| C    | -0.88415800 | 0.01422100  | -0.00002000 |
| C    | -1.47512000 | 1.27435100  | -0.00000400 |
| C    | -2.86245900 | 1.34347100  | 0.00004000  |
| H    | -0.85962400 | 2.16506700  | -0.00002500 |
| C    | -2.90614000 | -1.04719400 | 0.00004800  |
| C    | -3.59464500 | 0.16307100  | 0.00006800  |
| H    | -3.36261400 | 2.30472300  | 0.00005300  |
| H    | -3.44720600 | -1.98776600 | 0.00007100  |
| H    | -4.67737400 | 0.17064100  | 0.00010400  |
| N    | -1.57700300 | -1.12954300 | 0.00000300  |

B3LYP/6-311+G(2d,p)/SMD(DMSO)

Cartesian coordinates

| ATOM | X           | Y           | Z           |
|------|-------------|-------------|-------------|
| C    | 2.67612100  | 0.17056900  | 0.00001300  |
| C    | 0.57733300  | -0.13508100 | 0.00000000  |
| N    | 1.20161500  | -1.32282200 | 0.00002500  |
| H    | 0.78683200  | -2.24530500 | 0.00003800  |
| N    | 2.54526700  | -1.15044800 | 0.00002600  |
| N    | 1.48679800  | 0.83440400  | -0.00000300 |
| C    | 3.99945200  | 0.85407500  | 0.00001300  |
| H    | 4.80578900  | 0.12096300  | 0.00001500  |
| H    | 4.10704400  | 1.49142100  | -0.88086400 |
| H    | 4.10704400  | 1.49142500  | 0.88088700  |
| C    | -0.88220500 | 0.01154800  | -0.00001100 |
| C    | -1.47863800 | 1.27190900  | 0.00002400  |
| C    | -2.86479200 | 1.34539900  | 0.00001900  |
| H    | -0.86729000 | 2.16428500  | 0.00005700  |
| C    | -2.91760000 | -1.04350700 | -0.00005100 |
| C    | -3.60223800 | 0.16813000  | -0.00001900 |
| H    | -3.36083900 | 2.30841800  | 0.00004700  |
| H    | -3.46208100 | -1.98216400 | -0.00008100 |
| H    | -4.68480000 | 0.18077600  | -0.00002300 |
| N    | -1.58743600 | -1.13085800 | -0.00004800 |

### 9b-B-II

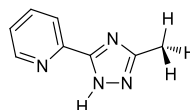

M06-2X/6-311+G(d,p)/SMD(DMSO)

Cartesian coordinates

| ATOM | X           | Y           | Z           |
|------|-------------|-------------|-------------|
| C    | -2.66764300 | 0.17006800  | 0.00007700  |
| C    | -0.57888200 | -0.12869400 | -0.00005300 |
| N    | -1.19827800 | -1.31405900 | -0.00006700 |
| H    | -0.77655600 | -2.23558200 | -0.00004900 |



|   |             |             |             |
|---|-------------|-------------|-------------|
| N | -2.53211000 | -1.14602100 | -0.00078100 |
| N | -1.48328800 | 0.83909700  | -0.00004800 |
| C | -3.99859500 | 0.84379200  | 0.00025200  |
| H | -3.86176500 | 1.92442400  | 0.00048100  |
| H | -4.57494800 | 0.56371400  | -0.88324000 |
| H | -4.57490900 | 0.56334300  | 0.88365400  |
| C | 0.88487400  | 0.01347500  | 0.00003500  |
| C | 1.47570900  | 1.27378200  | -0.00016400 |
| C | 2.86297200  | 1.34329900  | -0.00010000 |
| H | 0.85985700  | 2.16424200  | -0.00038900 |
| C | 2.90725400  | -1.04726000 | 0.00034800  |
| C | 3.59552500  | 0.16313400  | 0.00016000  |
| H | 3.36273500  | 2.30475800  | -0.00026800 |
| H | 3.44867200  | -1.98763500 | 0.00055500  |
| H | 4.67822600  | 0.17095800  | 0.00021400  |
| N | 1.57816200  | -1.13013100 | 0.00028300  |

B3LYP/6-311+G(2d,p)/SMD(DMSO)

Cartesian coordinates

| ATOM | X           | Y           | Z           |
|------|-------------|-------------|-------------|
| C    | -2.67537300 | 0.17277400  | -0.00002100 |
| C    | -0.57631600 | -0.13680500 | 0.00000600  |
| N    | -1.20282900 | -1.32248200 | -0.00006600 |
| H    | -0.78900200 | -2.24561500 | -0.00010900 |
| N    | -2.54514100 | -1.14937600 | -0.00007500 |
| N    | -1.48614300 | 0.83445500  | 0.00001800  |
| C    | -4.00193500 | 0.85400400  | 0.00000900  |
| H    | -3.86479100 | 1.93474000  | -0.00012600 |
| H    | -4.58526100 | 0.57882500  | -0.88167200 |
| H    | -4.58511200 | 0.57903600  | 0.88185600  |
| C    | 0.88275300  | 0.01010200  | 0.00002300  |
| C    | 1.47824500  | 1.27110700  | -0.00004400 |
| C    | 2.86424300  | 1.34592300  | -0.00004100 |
| H    | 0.86609300  | 2.16292500  | -0.00010400 |
| C    | 2.91932500  | -1.04285100 | 0.00009100  |
| C    | 3.60289400  | 0.16935600  | 0.00002900  |
| H    | 3.35928800  | 2.30947100  | -0.00009500 |
| H    | 3.46472700  | -1.98098000 | 0.00014500  |
| H    | 4.68543800  | 0.18306400  | 0.00003200  |
| N    | 1.58919900  | -1.13161600 | 0.00008900  |

### 9b-B-III

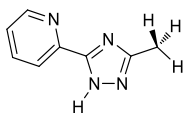

M06-2X/6-311+G(d,p)/SMD(DMSO)

Cartesian coordinates

| ATOM | X           | Y           | Z           |
|------|-------------|-------------|-------------|
| C    | -2.66714200 | -0.18035300 | 0.03555000  |
| C    | -0.58326100 | 0.15427900  | -0.03034000 |
| N    | -1.23176400 | 1.31099300  | -0.23467900 |
| H    | -0.85209400 | 2.22947600  | -0.43207200 |
| N    | -2.56291300 | 1.11549700  | -0.19919200 |
| N    | -1.46772500 | -0.81396400 | 0.14511500  |
| C    | -3.97460000 | -0.87852700 | 0.17662600  |
| H    | -4.79352700 | -0.17800900 | 0.01561900  |
| H    | -4.05279700 | -1.69000600 | -0.54924500 |
| H    | -4.06918200 | -1.31048500 | 1.17499200  |
| C    | 0.88732000  | 0.02384500  | -0.00395600 |
| C    | 1.70173000  | 1.13900200  | 0.18849000  |
| C    | 3.07858700  | 0.95699900  | 0.19648800  |
| H    | 1.27517100  | 2.12313300  | 0.34162800  |
| C    | 2.68934900  | -1.37223000 | -0.15405500 |
| C    | 3.58690900  | -0.32270800 | 0.02160600  |
| H    | 3.74014300  | 1.80224500  | 0.34439600  |
| H    | 3.05112300  | -2.38637800 | -0.29037800 |

|   |            |             |             |
|---|------------|-------------|-------------|
| H | 4.65270800 | -0.51316600 | 0.02294500  |
| N | 1.36741800 | -1.21233500 | -0.16986400 |

B3LYP/6-311+G(2d,p)/SMD(DMSO)

Cartesian coordinates

| ATOM | X           | Y           | Z           |
|------|-------------|-------------|-------------|
| C    | -2.67497900 | -0.18546200 | 0.00712400  |
| C    | -0.58096700 | 0.16802500  | 0.00227000  |
| N    | -1.23818900 | 1.34069000  | -0.05882200 |
| H    | -0.86866800 | 2.28043500  | -0.11237500 |
| N    | -2.57731100 | 1.13608100  | -0.05647800 |
| N    | -1.47098400 | -0.81869300 | 0.04599700  |
| C    | -3.98024400 | -0.90215100 | 0.03665800  |
| H    | -4.80547700 | -0.19309500 | -0.02598300 |
| H    | -4.05527100 | -1.60243300 | -0.79855700 |
| H    | -4.08557300 | -1.47944600 | 0.95837900  |
| C    | 0.88604100  | 0.03135500  | 0.00903700  |
| C    | 1.72266800  | 1.14956100  | 0.05416500  |
| C    | 3.09678000  | 0.95660800  | 0.04435500  |
| H    | 1.31858600  | 2.15257400  | 0.10119000  |
| C    | 2.68553900  | -1.39111900 | -0.04194900 |
| C    | 3.59440400  | -0.33852900 | -0.00572300 |
| H    | 3.76633100  | 1.80752400  | 0.07659600  |
| H    | 3.03667000  | -2.41749400 | -0.07824700 |
| H    | 4.65892500  | -0.53533500 | -0.01503000 |
| N    | 1.36348700  | -1.22128600 | -0.03663900 |

### 9b-B-IV

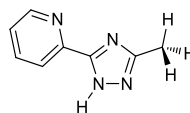

M06-2X/6-311+G(d,p)/SMD(DMSO)

Cartesian coordinates

| ATOM | X           | Y           | Z           |
|------|-------------|-------------|-------------|
| C    | -2.66611900 | -0.18287300 | 0.03791400  |
| C    | -0.58192200 | 0.15337500  | -0.03117900 |
| N    | -1.23150500 | 1.30796800  | -0.23798400 |
| H    | -0.85162300 | 2.22669000  | -0.43490900 |
| N    | -2.56135400 | 1.11340700  | -0.20055300 |
| N    | -1.46764300 | -0.81534400 | 0.14787300  |
| C    | -3.98192000 | -0.87374500 | 0.17711100  |
| H    | -3.81993000 | -1.93279400 | 0.37380100  |
| H    | -4.55657600 | -0.44758000 | 1.00122000  |
| H    | -4.57177400 | -0.77207000 | -0.73535600 |
| C    | 0.88829700  | 0.02330800  | -0.00436900 |
| C    | 1.70214500  | 1.13880300  | 0.18964100  |
| C    | 3.07901200  | 0.95768900  | 0.19791000  |
| H    | 1.27479500  | 2.12244000  | 0.34381600  |
| C    | 2.69144200  | -1.37142100 | -0.15483300 |
| C    | 3.58828900  | -0.32160000 | 0.02205500  |
| H    | 3.73994300  | 1.80322800  | 0.34699600  |
| H    | 3.05387900  | -2.38525300 | -0.29177600 |
| H    | 4.65420200  | -0.51137500 | 0.02373100  |
| N    | 1.36932300  | -1.21238800 | -0.17119600 |

B3LYP/6-311+G(2d,p)/SMD(DMSO)

Cartesian coordinates

| ATOM | X           | Y           | Z           |
|------|-------------|-------------|-------------|
| C    | -2.67398700 | -0.18588100 | 0.03481000  |
| C    | -0.57949700 | 0.15914600  | -0.02805000 |
| N    | -1.23391900 | 1.31741600  | -0.22015300 |
| H    | -0.85876200 | 2.23948400  | -0.40162600 |
| N    | -2.57216300 | 1.11900100  | -0.18773100 |
| N    | -1.47170500 | -0.81450900 | 0.13756300  |
| C    | -3.98726600 | -0.88225200 | 0.16391600  |
| H    | -3.82830300 | -1.94376000 | 0.35040500  |

|   |             |             |             |
|---|-------------|-------------|-------------|
| H | -4.56982300 | -0.46812800 | 0.98989900  |
| H | -4.58034500 | -0.77456700 | -0.74689000 |
| C | 0.88646700  | 0.02585300  | -0.00186300 |
| C | 1.71097100  | 1.13897600  | 0.17729900  |
| C | 3.08655300  | 0.95595900  | 0.18372400  |
| H | 1.29168300  | 2.12655700  | 0.32234900  |
| C | 2.69673100  | -1.37479500 | -0.14522600 |
| C | 3.59519200  | -0.32525000 | 0.01859700  |
| H | 3.74836900  | 1.80222200  | 0.32218500  |
| H | 3.05767500  | -2.39029500 | -0.27380800 |
| H | 4.66112100  | -0.51461600 | 0.01895300  |
| N | 1.37313000  | -1.21439900 | -0.15835200 |

### 9b-C-I

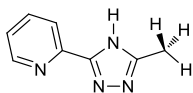

M06-2X/6-311+G(d,p)/SMD(DMSO)

Cartesian coordinates

| ATOM | X           | Y           | Z           |
|------|-------------|-------------|-------------|
| C    | -2.70125900 | 0.10506000  | 0.02432500  |
| C    | -0.56362700 | -0.28237700 | -0.03459800 |
| N    | -1.17958200 | -1.42085400 | -0.23171400 |
| N    | -2.52741900 | -1.17598500 | -0.19691200 |
| N    | -1.48725900 | 0.70555600  | 0.12848100  |
| C    | -3.99728000 | 0.81918200  | 0.14909200  |
| H    | -4.81072900 | 0.10602900  | 0.02310700  |
| H    | -4.08444100 | 1.29013900  | 1.13013800  |
| H    | -4.08234900 | 1.59623600  | -0.61301300 |
| C    | 0.89658600  | -0.07098800 | -0.00678300 |
| C    | 1.43736200  | 1.20552900  | -0.16098300 |
| C    | 2.81895000  | 1.34679000  | -0.13463500 |
| H    | 0.80227100  | 2.06941900  | -0.31477000 |
| C    | 2.97101700  | -1.01379300 | 0.17755600  |
| C    | 3.60628900  | 0.21707000  | 0.03818500  |
| H    | 3.26936100  | 2.32507500  | -0.25430000 |
| H    | 3.55403100  | -1.91914200 | 0.31401400  |
| H    | 4.68691800  | 0.27832800  | 0.06365800  |
| N    | 1.64841300  | -1.16449500 | 0.15876300  |
| H    | -1.32236500 | 1.68552400  | 0.32787700  |

B3LYP/6-311+G(2d,p)/SMD(DMSO)

Cartesian coordinates

| ATOM | X           | Y           | Z           |
|------|-------------|-------------|-------------|
| C    | 2.70967900  | 0.10714500  | -0.00002400 |
| C    | 0.56098400  | -0.28179800 | -0.00000900 |
| N    | 1.17832000  | -1.44372600 | -0.00008200 |
| N    | 2.53650200  | -1.19733500 | -0.00008400 |
| N    | 1.49499300  | 0.71534400  | 0.00003300  |
| C    | 4.00930200  | 0.82703300  | -0.00001000 |
| H    | 4.82306300  | 0.10292500  | -0.00005600 |
| H    | 4.10629700  | 1.46381500  | -0.88253300 |
| H    | 4.10632400  | 1.46373100  | 0.88257000  |
| C    | -0.89511400 | -0.06720800 | 0.00001300  |
| C    | -1.44240700 | 1.21851600  | 0.00008200  |
| C    | -2.82372200 | 1.35761900  | 0.00009500  |
| H    | -0.81315300 | 2.09904100  | 0.00012200  |
| C    | -2.98272600 | -1.02134700 | -0.00003000 |
| C    | -3.61562600 | 0.21807000  | 0.00003800  |
| H    | -3.27059900 | 2.34437100  | 0.00014800  |
| H    | -3.56857500 | -1.93519100 | -0.00007800 |
| H    | -4.69645700 | 0.27968500  | 0.00004400  |
| N    | -1.65905500 | -1.17156200 | -0.00004300 |
| H    | 1.33554500  | 1.71439100  | 0.00008800  |

### 9b-C-II

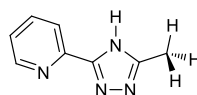

M06-2X/6-311+G(d,p)/SMD(DMSO)

Cartesian coordinates

| ATOM | X           | Y           | Z           |
|------|-------------|-------------|-------------|
| C    | -2.70238700 | 0.10492900  | 0.00008700  |
| C    | -0.56257500 | -0.28032900 | 0.00012800  |
| N    | -1.17787700 | -1.43708700 | -0.00042200 |
| N    | -2.52495100 | -1.19517400 | -0.00007500 |
| N    | -1.49175800 | 0.71675300  | 0.00036300  |
| C    | -4.00510700 | 0.82320100  | 0.00027300  |
| H    | -3.84532200 | 1.90117100  | 0.00019600  |
| H    | -4.58470900 | 0.55382400  | -0.88393000 |
| H    | -4.58438300 | 0.55390500  | 0.88471600  |
| C    | 0.89748500  | -0.06661700 | 0.00009100  |
| C    | 1.43806100  | 1.21942900  | -0.00018800 |
| C    | 2.82040000  | 1.35692800  | -0.00038000 |
| H    | 0.80622800  | 2.09901600  | -0.00024900 |
| C    | 2.97481200  | -1.02322100 | 0.00005300  |
| C    | 3.60976900  | 0.21579400  | -0.00028200 |
| H    | 3.26898300  | 2.34328700  | -0.00061400 |
| H    | 3.55895600  | -1.93805800 | 0.00018300  |
| H    | 4.69082900  | 0.27438500  | -0.00044900 |
| N    | 1.65218800  | -1.17110400 | 0.00024000  |
| H    | -1.33655700 | 1.71807200  | 0.00071600  |

B3LYP/6-311+G(2d,p)/SMD(DMSO)

Cartesian coordinates

| ATOM | X           | Y           | Z           |
|------|-------------|-------------|-------------|
| C    | -2.70885400 | 0.10703400  | 0.00002600  |
| C    | -0.56046900 | -0.28354900 | 0.00001200  |
| N    | -1.17972800 | -1.44501200 | 0.00008700  |
| N    | -2.53664500 | -1.19807700 | 0.00008700  |
| N    | -1.49466300 | 0.71347100  | -0.00003000 |
| C    | -4.00897300 | 0.82990700  | 0.00000700  |
| H    | -3.85074700 | 1.90850800  | -0.00002600 |
| H    | -4.59503400 | 0.56582000  | -0.88259200 |
| H    | -4.59503100 | 0.56587400  | 0.88262300  |
| C    | 0.89519000  | -0.06843300 | -0.00001200 |
| C    | 1.44149200  | 1.21794200  | -0.00008400 |
| C    | 2.82253800  | 1.35847200  | -0.00010000 |
| H    | 0.81150900  | 2.09795800  | -0.00012500 |
| C    | 2.98402400  | -1.02021000 | 0.00003000  |
| C    | 3.61573700  | 0.21972300  | -0.00004200 |
| H    | 3.26828900  | 2.34575200  | -0.00015600 |
| H    | 3.57082400  | -1.93345000 | 0.00007800  |
| H    | 4.69649600  | 0.28251700  | -0.00005100 |
| N    | 1.66039600  | -1.17193800 | 0.00004500  |
| H    | -1.33594500 | 1.71259600  | -0.00008600 |

### 9b-C-III

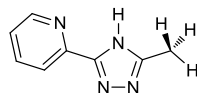

M06-2X/6-311+G(d,p)/SMD(DMSO)

Cartesian coordinates

| ATOM | X           | Y           | Z           |
|------|-------------|-------------|-------------|
| C    | -2.68231500 | -0.12138800 | 0.00003300  |
| C    | -0.55940300 | 0.31866800  | -0.00008800 |
| N    | -1.19625500 | 1.46176200  | 0.00009200  |
| N    | -2.53921300 | 1.18426800  | -0.00061300 |
| N    | -1.45553600 | -0.70205200 | 0.00002900  |
| C    | -3.96532400 | -0.87127600 | 0.00017100  |
| H    | -4.79179600 | -0.16218000 | -0.00013600 |

|   |             |             |             |
|---|-------------|-------------|-------------|
| H | -4.04182600 | -1.50737600 | -0.88366100 |
| H | -4.04200000 | -1.50682400 | 0.88438700  |
| C | 0.89542400  | 0.11075500  | -0.00002600 |
| C | 1.77337600  | 1.19286800  | 0.00005900  |
| C | 3.13542800  | 0.92768500  | 0.00012300  |
| H | 1.39035700  | 2.20553700  | 0.00007700  |
| C | 2.60713400  | -1.40311800 | 0.00003200  |
| C | 3.56502500  | -0.39463600 | 0.00010700  |
| H | 3.85078500  | 1.74175100  | 0.00018800  |
| H | 2.90572400  | -2.44629300 | 0.00009000  |
| H | 4.61814300  | -0.64578100 | 0.00015200  |
| N | 1.29545500  | -1.16461900 | -0.00003400 |
| H | -1.23660300 | -1.69169700 | 0.00021500  |

B3LYP/6-311+G(2d,p)/SMD(DMSO)

Cartesian coordinates

| ATOM | X           | Y           | Z           |
|------|-------------|-------------|-------------|
| C    | -2.68931900 | -0.12399800 | -0.00001900 |
| C    | -0.55775200 | 0.32097000  | -0.00001500 |
| N    | -1.19866600 | 1.46854300  | -0.00009300 |
| N    | -2.55154100 | 1.18618700  | -0.00009000 |
| N    | -1.45904900 | -0.69974600 | 0.00002400  |
| C    | -3.97056800 | -0.87611900 | 0.00001100  |
| H    | -4.80293300 | -0.17348800 | -0.00006800 |
| H    | -4.05067800 | -1.51560300 | -0.88228600 |
| H    | -4.05072400 | -1.51545500 | 0.88241100  |
| C    | 0.89338000  | 0.11406900  | 0.00000800  |
| C    | 1.78078000  | 1.19160500  | -0.00006000 |
| C    | 3.14181900  | 0.92546700  | -0.00003900 |
| H    | 1.40630300  | 2.20651200  | -0.00012800 |
| C    | 2.61361300  | -1.40391100 | 0.00011200  |
| C    | 3.57196900  | -0.39677300 | 0.00004900  |
| H    | 3.85696600  | 1.73932500  | -0.00009000 |
| H    | 2.91210700  | -2.44718800 | 0.00018100  |
| H    | 4.62524700  | -0.64691500 | 0.00006700  |
| N    | 1.30063300  | -1.16461400 | 0.00009300  |
| H    | -1.23945700 | -1.68763800 | 0.00008200  |

### 9b-C-IV

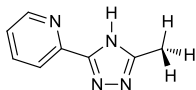

M06-2X/6-311+G(d,p)/SMD(DMSO)

Cartesian coordinates

| ATOM | X           | Y           | Z           |
|------|-------------|-------------|-------------|
| C    | 2.68128300  | -0.12169000 | 0.00001900  |
| C    | 0.55903900  | 0.31993900  | -0.00000800 |
| N    | 1.19794000  | 1.46241300  | 0.00010600  |
| N    | 2.53970900  | 1.18429700  | -0.00017500 |
| N    | 1.45498400  | -0.70099600 | 0.00001400  |
| C    | 3.96542900  | -0.87252000 | 0.00006000  |
| H    | 3.77775300  | -1.94586400 | -0.00003800 |
| H    | 4.55201800  | -0.61845800 | -0.88409800 |
| H    | 4.55188000  | -0.61860800 | 0.88435500  |
| C    | -0.89557500 | 0.11184200  | -0.00000300 |
| C    | -1.77475000 | 1.19320000  | 0.00016000  |
| C    | -3.13649500 | 0.92682500  | 0.00014800  |
| H    | -1.39240400 | 2.20615100  | 0.00029500  |
| C    | -2.60634700 | -1.40349200 | -0.00017300 |
| C    | -3.56509300 | -0.39585800 | -0.00002600 |
| H    | -3.85259700 | 1.74027600  | 0.00027200  |
| H    | -2.90414800 | -2.44693100 | -0.00031200 |
| H    | -4.61798700 | -0.64789700 | -0.00004500 |
| N    | -1.29486400 | -1.16389600 | -0.00016200 |
| H    | 1.23614600  | -1.69086500 | 0.00001500  |

B3LYP/6-311+G(2d,p)/SMD(DMSO)

Cartesian coordinates

| ATOM | X           | Y           | Z           |
|------|-------------|-------------|-------------|
| C    | -2.68841100 | -0.12361600 | -0.00002000 |
| C    | -0.55727900 | 0.32325100  | -0.00001600 |
| N    | -1.20025900 | 1.47021000  | -0.00009000 |
| N    | -2.55186100 | 1.18723600  | -0.00007000 |
| N    | -1.45866600 | -0.69750500 | 0.00001400  |
| C    | -3.96944200 | -0.87988700 | 0.00000700  |
| H    | -3.78242600 | -1.95379300 | 0.00003200  |
| H    | -4.56260200 | -0.63183500 | 0.88251200  |
| H    | -4.56261300 | -0.63187900 | -0.88250300 |
| C    | 0.89342400  | 0.11562200  | 0.00000600  |
| C    | 1.78250700  | 1.19190300  | -0.00007200 |
| C    | 3.14313500  | 0.92381200  | -0.00004800 |
| H    | 1.40958700  | 2.20740000  | -0.00015000 |
| C    | 2.61195500  | -1.40473100 | 0.00012300  |
| C    | 3.57169000  | -0.39902300 | 0.00005200  |
| H    | 3.85940100  | 1.73669300  | -0.00010800 |
| H    | 2.90890900  | -2.44846800 | 0.00020100  |
| H    | 4.62462500  | -0.65059400 | 0.00007300  |
| N    | 1.29928300  | -1.16364500 | 0.00010200  |
| H    | -1.23983400 | -1.68558100 | 0.00005900  |

### TS-AB

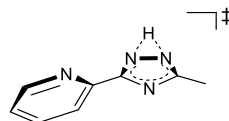

M06-2X/6-311+G(d,p)/SMD(DMSO)

Imaginary frequency: -1703.5935 cm<sup>-1</sup>

Cartesian coordinates

| ATOM | X           | Y           | Z           |
|------|-------------|-------------|-------------|
| N    | 1.15826700  | -1.42831500 | -0.02635800 |
| H    | 1.93837100  | -1.70017700 | 0.90708200  |
| C    | 0.57504900  | -0.22337200 | -0.04428100 |
| N    | 1.44732100  | 0.78783300  | -0.09915500 |
| C    | 2.64473900  | 0.20234700  | -0.01344900 |
| N    | 2.56891700  | -1.13688900 | -0.00519800 |
| C    | -0.89205400 | -0.04426400 | -0.02517000 |
| C    | -1.43403500 | 1.23841800  | 0.02349600  |
| C    | -2.81683200 | 1.36813500  | 0.04991900  |
| H    | -0.78378900 | 2.10338200  | 0.04374500  |
| C    | -2.95881200 | -1.01567400 | -0.02155000 |
| C    | -3.59796400 | 0.22078400  | 0.02671700  |
| H    | -3.27389700 | 2.34981000  | 0.08986500  |
| H    | -3.53949600 | -1.93238200 | -0.04139700 |
| H    | -4.67935600 | 0.27227700  | 0.04539400  |
| C    | 3.94096300  | 0.93225600  | 0.02299000  |
| H    | 4.10385900  | 1.45490000  | -0.92173700 |
| H    | 3.93076100  | 1.67584800  | 0.82117800  |
| H    | 4.76171000  | 0.23555100  | 0.18754600  |
| N    | -1.63514600 | -1.15562600 | -0.04696200 |

### 9b-A·H<sub>2</sub>O

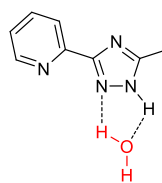

M06-2X/6-311+G(d,p)/SMD(DMSO)

Cartesian coordinates

| ATOM | X           | Y           | Z           |
|------|-------------|-------------|-------------|
| C    | -0.26831100 | -0.25892200 | -0.02455100 |

|   |             |             |             |
|---|-------------|-------------|-------------|
| C | -2.17444800 | -1.16894700 | -0.01916900 |
| N | -2.30318200 | 0.16504000  | -0.04694200 |
| H | -3.14748500 | 0.73096600  | -0.05980500 |
| N | -1.10034300 | 0.76519700  | -0.05036300 |
| N | -0.88490500 | -1.47123300 | -0.00687200 |
| H | -1.98388100 | 2.68918700  | 0.01503800  |
| O | -2.91588600 | 2.92452000  | 0.12212600  |
| H | -3.05245100 | 3.71027300  | -0.41603500 |
| C | 1.20177700  | -0.10391500 | -0.01183000 |
| C | 2.02068600  | -1.23256500 | 0.01159400  |
| C | 3.39746300  | -1.05199200 | 0.02639500  |
| H | 1.58126200  | -2.22152300 | 0.01789700  |
| C | 3.00534400  | 1.30192400  | -0.00582800 |
| C | 3.90550500  | 0.24058500  | 0.01792200  |
| H | 4.06153500  | -1.90835500 | 0.04446400  |
| H | 3.36609600  | 2.32577000  | -0.01288500 |
| H | 4.97131500  | 0.43096100  | 0.02948600  |
| N | 1.68284000  | 1.14398300  | -0.02070000 |
| C | -3.32188700 | -2.11179900 | 0.02899400  |
| H | -3.44753100 | -2.49312300 | 1.04455800  |
| H | -4.24158900 | -1.61046900 | -0.27266400 |
| H | -3.13783100 | -2.95696400 | -0.63408200 |

### TS-AB

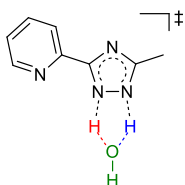

M06-2X/6-311+G(d,p)/SMD(DMSO)

Imaginary frequency: -671. 6740 cm<sup>-1</sup>

Cartesian coordinates

| ATOM | X           | Y           | Z           |
|------|-------------|-------------|-------------|
| C    | 0.29464600  | -0.23364700 | -0.00010200 |
| C    | 2.25329000  | -1.01688800 | 0.00067300  |
| N    | 2.37171800  | 0.30718600  | -0.00034800 |
| H    | 2.99857400  | 1.69835500  | -0.01617200 |
| N    | 1.10809000  | 0.81389400  | -0.00142000 |
| N    | 0.96490800  | -1.40151500 | 0.00219400  |
| H    | 1.61007100  | 2.25504100  | -0.01852400 |
| O    | 2.58958600  | 2.69055600  | -0.07528200 |
| H    | 2.79477800  | 3.20744900  | 0.72121900  |
| C    | -1.17772100 | -0.12453500 | 0.00052200  |
| C    | -1.96520600 | -1.27656000 | 0.01939700  |
| C    | -3.34618000 | -1.13687200 | 0.01848300  |
| H    | -1.49560500 | -2.25154900 | 0.03464000  |
| C    | -3.02391400 | 1.22740700  | -0.01920000 |
| C    | -3.89245500 | 0.14057500  | -0.00163000 |
| H    | -3.98496900 | -2.01240900 | 0.03291300  |
| H    | -3.41479900 | 2.24011200  | -0.03493400 |
| H    | -4.96346000 | 0.29933500  | -0.00352700 |
| C    | 3.41768300  | -1.94628100 | -0.00952300 |
| H    | 3.43530900  | -2.52838700 | -0.93336800 |
| H    | 4.34813900  | -1.38376700 | 0.06706000  |
| H    | 3.35799000  | -2.64643300 | 0.82565100  |
| N    | -1.69665600 | 1.10880800  | -0.01820000 |

### 9b-B·H<sub>2</sub>O

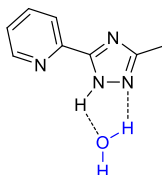

M06-2X/6-311+G(d,p)/SMD(DMSO)

Cartesian coordinates

| ATOM | X           | Y           | Z           |
|------|-------------|-------------|-------------|
| C    | -2.22038400 | -1.11724900 | -0.00603200 |
| C    | -0.25136500 | -0.35632600 | -0.00674100 |
| N    | -1.11740100 | 0.66223300  | -0.02096200 |
| H    | -0.93198100 | 1.66074000  | -0.03066500 |
| N    | -2.38054500 | 0.19509100  | -0.02068300 |
| N    | -0.91533900 | -1.50221300 | 0.00253100  |
| H    | -3.18049500 | 2.11046000  | 0.00124100  |
| O    | -2.79533400 | 2.99262500  | 0.10020600  |
| H    | -3.26079200 | 3.55313000  | -0.52805700 |
| C    | 1.20775600  | -0.16715500 | -0.00295500 |
| C    | 2.06605300  | -1.26267500 | 0.00422800  |
| C    | 3.43366200  | -1.01943100 | 0.00737200  |
| H    | 1.66541100  | -2.26843500 | 0.00692800  |
| C    | 2.94013500  | 1.32025300  | -0.00361900 |
| C    | 3.88258400  | 0.29499200  | 0.00355400  |
| H    | 4.13617600  | -1.84453700 | 0.01267600  |
| H    | 3.25634800  | 2.35820300  | -0.00655100 |
| H    | 4.93939300  | 0.53027800  | 0.00602000  |
| C    | -3.36026000 | -2.07353400 | 0.00787200  |
| H    | -3.34728200 | -2.66633500 | 0.92474000  |
| H    | -3.29141600 | -2.76058700 | -0.83743200 |
| H    | -4.30400400 | -1.53204800 | -0.04986500 |
| N    | 1.62646000  | 1.10272900  | -0.00699500 |

### H<sub>2</sub>O

M06-2X/6-311+G(d,p)/SMD(DMSO)

Cartesian coordinates

| ATOM | X          | Y           | Z           |
|------|------------|-------------|-------------|
| O    | 0.00000000 | 0.00000000  | 0.11793700  |
| H    | 0.00000000 | 0.76072700  | -0.47174800 |
| H    | 0.00000000 | -0.76072700 | -0.47174800 |

M06-2X/6-311+G(d,p)/H<sub>2</sub>O

Cartesian coordinates

| ATOM | X          | Y           | Z           |
|------|------------|-------------|-------------|
| O    | 0.00000000 | 0.00000000  | 0.11831800  |
| H    | 0.00000000 | 0.75973900  | -0.47327400 |
| H    | 0.00000000 | -0.75973900 | -0.47327400 |

### 9b-A·2H<sub>2</sub>O

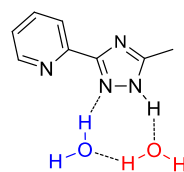

M06-2X/6-311+G(d,p)/SMD(DMSO)

Cartesian coordinates

| ATOM | X           | Y           | Z           |
|------|-------------|-------------|-------------|
| C    | -0.03077200 | -0.57290300 | 0.00019500  |
| C    | 1.74172000  | -1.71982700 | -0.00967300 |
| N    | 2.04815400  | -0.41615200 | 0.00142500  |
| H    | 2.95856700  | 0.05432900  | 0.00685200  |
| N    | 0.93101100  | 0.33109200  | 0.00908900  |
| N    | 0.42171100  | -1.85264800 | -0.01118700 |
| H    | 3.21379900  | 2.35762400  | -0.02316400 |
| O    | 3.91557100  | 1.68155800  | -0.06623300 |
| H    | 4.60315800  | 1.96616300  | 0.54380900  |
| O    | 1.54769400  | 3.08869400  | 0.08188000  |
| H    | 1.08542700  | 2.22935900  | 0.03202600  |
| H    | 1.13100900  | 3.66108400  | -0.56978900 |
| C    | -1.46371100 | -0.21512200 | 0.00052400  |

|   |             |             |             |
|---|-------------|-------------|-------------|
| C | -2.43248700 | -1.21716400 | 0.01970000  |
| C | -3.76996100 | -0.84404200 | 0.02008200  |
| H | -2.13482900 | -2.25765000 | 0.03376700  |
| C | -3.04842200 | 1.43182800  | -0.01679900 |
| C | -4.08928200 | 0.50739500  | 0.00180100  |
| H | -4.54875400 | -1.59775200 | 0.03478700  |
| H | -3.26201100 | 2.49607800  | -0.03179100 |
| H | -5.11763700 | 0.84610100  | 0.00157700  |
| N | -1.76104800 | 1.08910000  | -0.01804200 |
| C | 2.74442300  | -2.81698800 | -0.01314500 |
| H | 3.75467700  | -2.41469100 | -0.08556700 |
| H | 2.66006500  | -3.39968900 | 0.90574900  |
| H | 2.56256800  | -3.48177300 | -0.85853900 |

M06-2X/6-311+G(d,p)/SMD(H<sub>2</sub>O)

Cartesian coordinates

| ATOM | X           | Y           | Z           |
|------|-------------|-------------|-------------|
| C    | -0.08120100 | -0.54220900 | -0.00195900 |
| C    | 1.67510100  | -1.71228000 | -0.01535500 |
| N    | 1.99960000  | -0.41430700 | -0.00495700 |
| H    | 2.92226400  | 0.03568500  | -0.00222300 |
| N    | 0.89322300  | 0.34925100  | 0.00423700  |
| N    | 0.35333400  | -1.83028900 | -0.01393900 |
| H    | 3.43708700  | 2.18423000  | -0.00100900 |
| O    | 4.12067100  | 1.48927000  | -0.03454500 |
| H    | 4.63656300  | 1.60352300  | 0.77091200  |
| O    | 1.78241800  | 3.05375900  | 0.03828800  |
| H    | 1.29897600  | 2.20557400  | -0.00559900 |
| H    | 1.53912500  | 3.52687400  | -0.76477200 |
| C    | -1.50950600 | -0.17152800 | 0.00304800  |
| C    | -2.48307000 | -1.16901200 | 0.00484300  |
| C    | -3.81984000 | -0.79439800 | 0.00996600  |
| H    | -2.19249000 | -2.21059000 | 0.00263900  |
| C    | -3.09368400 | 1.47769100  | 0.01089300  |
| C    | -4.13631900 | 0.55727300  | 0.01314700  |
| H    | -4.59944200 | -1.54687100 | 0.01162300  |
| H    | -3.30502800 | 2.54171600  | 0.01319400  |
| H    | -5.16310800 | 0.89965000  | 0.01733200  |
| N    | -1.80512000 | 1.13494100  | 0.00584700  |
| C    | 2.67355400  | -2.80991700 | -0.01782100 |
| H    | 3.68270300  | -2.40841900 | -0.10311600 |
| H    | 2.59700100  | -3.38380300 | 0.90713200  |

### TS-AB·2H<sub>2</sub>O

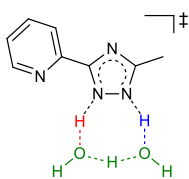

M06-2X/6-311+G(d,p)/SMD(DMSO)

Imaginary frequency: -979.4594 cm<sup>-1</sup>

Cartesian coordinates

| ATOM | X           | Y           | Z           |
|------|-------------|-------------|-------------|
| C    | -1.79206600 | -1.58505300 | 0.01274300  |
| C    | 0.03247700  | -0.53527200 | -0.00064700 |
| N    | -0.92086700 | 0.38738600  | -0.00756200 |
| H    | -1.12263800 | 1.85163600  | -0.01288900 |
| N    | -2.09714400 | -0.28981900 | 0.00195700  |
| N    | -0.46348800 | -1.78556500 | 0.01144300  |
| H    | -2.77360600 | 2.34645100  | -0.00366000 |
| O    | -1.65090000 | 2.78670600  | -0.04874200 |
| H    | -1.41527800 | 3.33643100  | 0.71017400  |
| O    | -3.72676800 | 1.61326700  | 0.03293000  |
| H    | -3.21318400 | 0.66509000  | -0.00202000 |
| H    | -4.31335700 | 1.70970700  | -0.72901000 |
| C    | 1.47098100  | -0.20794000 | -0.00397900 |

|   |             |             |             |
|---|-------------|-------------|-------------|
| C | 2.42296100  | -1.22749900 | -0.02183800 |
| C | 3.76668100  | -0.87980200 | -0.02264200 |
| H | 2.10534700  | -2.26216300 | -0.03417500 |
| C | 3.08912500  | 1.40908700  | 0.01038200  |
| C | 4.11223300  | 0.46590200  | -0.00624800 |
| H | 4.53124100  | -1.64809200 | -0.03601600 |
| H | 3.32258000  | 2.46924900  | 0.02360300  |
| H | 5.14687300  | 0.78485800  | -0.00604500 |
| N | 1.79498300  | 1.09071900  | 0.01202700  |
| C | -2.80954300 | -2.67414800 | 0.02994200  |
| H | -2.72507200 | -3.25970900 | 0.94771500  |
| H | -3.81438200 | -2.25538700 | -0.02760200 |
| H | -2.65865500 | -3.34855700 | -0.81491100 |

M06-2X/6-311+G(d,p)/SMD(H<sub>2</sub>O)

Imaginary frequency: -917.2093 cm<sup>-1</sup>

Cartesian coordinates

| ATOM | X           | Y           | Z           |
|------|-------------|-------------|-------------|
| C    | -1.77823000 | -1.61348300 | 0.01533100  |
| C    | 0.03404700  | -0.55035300 | 0.00542400  |
| N    | -0.92658700 | 0.36461700  | -0.00111200 |
| H    | -1.14713800 | 1.89778700  | 0.02447100  |
| N    | -2.09888100 | -0.32137400 | 0.00530100  |
| N    | -0.44780000 | -1.80889100 | 0.01551300  |
| H    | -2.78460700 | 2.36296000  | -0.00394200 |
| O    | -1.65194400 | 2.81475400  | -0.00011700 |
| H    | -1.47356900 | 3.27982500  | 0.82811700  |
| O    | -3.74319800 | 1.65047700  | -0.01165300 |
| H    | -3.26444000 | 0.72150600  | -0.02763400 |
| H    | -4.23005500 | 1.75157600  | -0.84087500 |
| C    | 1.46722200  | -0.20779400 | -0.00176700 |
| C    | 2.43043600  | -1.21741600 | -0.01196700 |
| C    | 3.77157100  | -0.86159400 | -0.02089000 |
| H    | 2.12506100  | -2.25496000 | -0.01402500 |
| C    | 3.07822000  | 1.41976000  | -0.00869200 |
| C    | 4.10814400  | 0.48625000  | -0.01923600 |
| H    | 4.54075700  | -1.62485600 | -0.02966000 |
| H    | 3.30390000  | 2.48104100  | -0.00722200 |
| H    | 5.13961300  | 0.81420100  | -0.02647600 |
| N    | 1.78432700  | 1.09506700  | 0.00029100  |
| C    | -2.79142300 | -2.70477800 | 0.03179200  |
| H    | -2.71870400 | -3.28077000 | 0.95675900  |
| H    | -3.79632800 | -2.28985000 | -0.04264000 |
| H    | -2.63068700 | -3.38979400 | -0.80263900 |

### 9b-B·2H<sub>2</sub>O

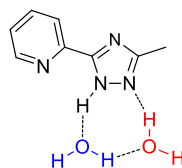

M06-2X/6-311+G(d,p)/SMD(DMSO)

Cartesian coordinates

| ATOM | X           | Y           | Z           |
|------|-------------|-------------|-------------|
| C    | 1.72173100  | -1.65963600 | -0.00764200 |
| C    | -0.11343300 | -0.61765900 | -0.00065800 |
| N    | 0.88663500  | 0.26762500  | -0.00157700 |
| H    | 0.86314700  | 1.29334100  | -0.00091700 |
| N    | 2.06655000  | -0.38223700 | -0.00689100 |
| N    | 0.37675400  | -1.84969500 | -0.00410200 |
| H    | 2.65564400  | 2.69537600  | 0.02315600  |
| O    | 1.71459600  | 2.94650300  | 0.07024500  |
| H    | 1.58909800  | 3.65653500  | -0.56712400 |
| O    | 4.10207700  | 1.58161900  | -0.06369400 |
| H    | 3.58003300  | 0.75684300  | -0.01688500 |
| H    | 4.77720900  | 1.51579600  | 0.61911300  |

|   |             |             |             |
|---|-------------|-------------|-------------|
| C | -1.53096300 | -0.22351300 | 0.00160300  |
| C | -2.53434000 | -1.18779700 | 0.00793000  |
| C | -3.85443800 | -0.75579800 | 0.00903600  |
| H | -2.27772100 | -2.23960800 | 0.01171300  |
| C | -3.03790800 | 1.49178500  | -0.00196000 |
| C | -4.11471300 | 0.60850200  | 0.00407600  |
| H | -4.66561300 | -1.47438800 | 0.01372600  |
| H | -3.20629300 | 2.56378100  | -0.00593200 |
| H | -5.12813300 | 0.98945500  | 0.00474300  |
| C | 2.70950500  | -2.77347200 | -0.01055500 |
| H | 2.58161800  | -3.39358300 | 0.87867300  |
| H | 2.56275000  | -3.40598300 | -0.88794000 |
| H | 3.72434400  | -2.37675200 | -0.02395400 |
| N | -1.76738600 | 1.09284000  | -0.00339500 |

M06-2X/6-311+G(d,p)/SMD(H<sub>2</sub>O)

Cartesian coordinates

| ATOM | X           | Y           | Z           |
|------|-------------|-------------|-------------|
| C    | 1.75353100  | -1.68192300 | -0.02878900 |
| C    | -0.08144700 | -0.64154700 | -0.01798200 |
| N    | 0.91802700  | 0.24346400  | -0.05699900 |
| H    | 0.88969200  | 1.26992400  | -0.07123100 |
| N    | 2.09898900  | -0.40523700 | -0.06397400 |
| N    | 0.40870500  | -1.87506200 | -0.00016200 |
| H    | 2.47875100  | 2.74421900  | 0.01613100  |
| O    | 1.54032700  | 3.01312800  | 0.01343700  |
| H    | 1.42541400  | 3.52984400  | -0.79142400 |
| O    | 4.01494500  | 1.72240300  | 0.04617000  |
| H    | 3.53220700  | 0.87373700  | 0.04193500  |
| H    | 4.49676000  | 1.73765900  | 0.88012300  |
| C    | -1.49617200 | -0.24611700 | 0.00032500  |
| C    | -2.49976600 | -1.20964100 | 0.02702800  |
| C    | -3.82059900 | -0.78079800 | 0.04256500  |
| H    | -2.24727300 | -2.26148700 | 0.03518600  |
| C    | -3.00804400 | 1.46519500  | 0.00451400  |
| C    | -4.08309400 | 0.58254500  | 0.03105300  |
| H    | -4.62991400 | -1.50066900 | 0.06302200  |
| H    | -3.17908200 | 2.53609500  | -0.00475700 |
| H    | -5.09621300 | 0.96327100  | 0.04229100  |
| C    | 2.74651700  | -2.78795600 | -0.01447200 |
| H    | 2.65731000  | -3.36285200 | 0.90926600  |
| H    | 2.57035400  | -3.46565500 | -0.85148500 |
| H    | 3.75731800  | -2.38898800 | -0.08687000 |
| N    | -1.73472900 | 1.07142300  | -0.01093600 |

**TS1-BC**

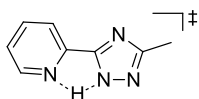

M06-2X/6-311+G(d,p)/SMD(DMSO)

Imaginary frequency: -1627.3150 cm<sup>-1</sup>

Cartesian coordinates

| ATOM | X           | Y           | Z           |
|------|-------------|-------------|-------------|
| C    | -0.62121800 | 0.14284900  | 0.00000000  |
| N    | -1.65184700 | 0.98117200  | 0.00000000  |
| N    | -0.98683300 | -1.13668700 | 0.00000100  |
| C    | 0.84450200  | 0.27178500  | 0.00000000  |
| C    | 1.65766800  | 1.39082800  | -0.00000200 |
| C    | 3.03738400  | 1.18208700  | -0.00000200 |
| H    | 1.22539900  | 2.38480200  | -0.00000200 |
| C    | 2.66999100  | -1.18822400 | 0.00000000  |
| C    | 3.55277200  | -0.11154200 | -0.00000100 |
| H    | 3.71041200  | 2.03348100  | -0.00000300 |
| H    | 3.00373500  | -2.21985600 | 0.00000100  |
| H    | 4.62104700  | -0.29169800 | -0.00000200 |
| N    | 1.35825800  | -0.97679300 | 0.00000000  |
| C    | -2.69267900 | 0.10605800  | 0.00000100  |

|   |             |             |             |
|---|-------------|-------------|-------------|
| C | -4.12276400 | 0.53812000  | 0.00000100  |
| H | -4.34918400 | 1.14332600  | 0.88316400  |
| H | -4.34918400 | 1.14332800  | -0.88316200 |
| H | -4.77764500 | -0.33589900 | 0.00000000  |
| N | -2.33015900 | -1.18171300 | 0.00000200  |
| H | 0.23555200  | -1.65110200 | 0.00000100  |

**II**

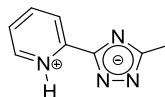

M06-2X/6-311+G(d,p)/SMD(DMSO)

Cartesian coordinates

| ATOM | X           | Y           | Z           |
|------|-------------|-------------|-------------|
| C    | -0.63156300 | -0.15048300 | -0.00005500 |
| N    | -1.53912200 | 0.84427900  | -0.00050400 |
| N    | -1.16452300 | -1.37035800 | 0.00010100  |
| C    | 0.80654500  | 0.05033200  | -0.00019000 |
| C    | 1.43528300  | 1.29244800  | -0.00025800 |
| C    | 2.81813000  | 1.35141700  | -0.00034100 |
| H    | 0.82580800  | 2.18575700  | -0.00021900 |
| C    | 2.92390700  | -1.02874100 | -0.00032800 |
| C    | 3.57962100  | 0.17931100  | -0.00036600 |
| H    | 3.31354800  | 2.31492200  | -0.00037300 |
| H    | 3.41938600  | -1.98956000 | -0.00035200 |
| H    | 4.66022400  | 0.20313400  | -0.00042200 |
| N    | 1.58051100  | -1.05401700 | -0.00025400 |
| C    | -2.68788500 | 0.14968100  | 0.00039400  |
| C    | -4.04299300 | 0.77815700  | 0.00078300  |
| H    | -4.81315000 | 0.00638100  | 0.00094000  |
| H    | -4.18176300 | 1.40743900  | 0.88275700  |
| H    | -4.18221700 | 1.40757800  | -0.88101300 |
| N    | -2.49800600 | -1.17886200 | 0.00081000  |
| H    | 1.09987700  | -1.95567000 | -0.00023000 |

**TS2-rot**

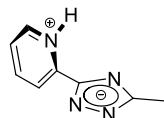

M06-2X/6-311+G(d,p)/SMD(DMSO)

Imaginary frequency: -82.7341 cm<sup>-1</sup>

Cartesian coordinates

| ATOM | X           | Y           | Z           |
|------|-------------|-------------|-------------|
| C    | -0.64761000 | 0.03200900  | 0.21947800  |
| N    | -1.49409300 | -0.05312600 | -0.82137900 |
| N    | -1.23599600 | 0.11227700  | 1.40434200  |
| C    | 0.82322500  | 0.06987300  | -0.06297500 |
| C    | 1.55420300  | 1.23780700  | -0.07414400 |
| C    | 2.93543900  | 1.17177300  | -0.22075600 |
| H    | 1.03324600  | 2.18558500  | -0.06546800 |
| C    | 2.82405900  | -1.20388100 | -0.08848200 |
| C    | 3.58065600  | -0.06076100 | -0.23005600 |
| H    | 3.50891900  | 2.08456300  | -0.32880900 |
| H    | 3.23099100  | -2.20540600 | -0.08051500 |
| H    | 4.65269100  | -0.14130400 | -0.34398500 |
| N    | 1.49364700  | -1.10042700 | 0.05112600  |
| C    | -2.68659300 | -0.01626900 | -0.18697100 |
| C    | -4.00142200 | -0.06368800 | -0.89676900 |
| H    | -4.81649000 | -0.05024800 | -0.17235200 |
| H    | -4.11699500 | 0.79458500  | -1.56296600 |
| H    | -4.09066200 | -0.96777500 | -1.50306100 |
| N    | -2.57067400 | 0.07840800  | 1.13572400  |
| H    | 0.95637100  | -1.96110400 | 0.15681200  |

I2

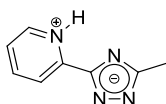

M06-2X/6-311+G(d,p)/SMD(DMSO)

Cartesian coordinates

| ATOM | X           | Y           | Z           |
|------|-------------|-------------|-------------|
| C    | 0.62540800  | 0.29683800  | -0.00003400 |
| N    | 1.45254500  | -0.76798300 | -0.00001700 |
| N    | 1.25143900  | 1.47036600  | -0.00026500 |
| C    | -0.81973700 | 0.16076900  | -0.00008700 |
| C    | -1.72644600 | 1.21896600  | -0.00030400 |
| C    | -3.08222600 | 0.94662700  | -0.00032500 |
| H    | -1.34771200 | 2.23185700  | -0.00044200 |
| C    | -2.62082900 | -1.39136900 | 0.00004600  |
| C    | -3.54373700 | -0.37418400 | -0.00014700 |
| H    | -3.79288800 | 1.76460200  | -0.00048300 |
| H    | -2.87339100 | -2.44257500 | 0.00018600  |
| H    | -4.59921100 | -0.60697500 | -0.00016600 |
| N    | -1.30877400 | -1.09486800 | 0.00006900  |
| C    | 2.65291300  | -0.16843700 | 0.00026900  |
| C    | 3.95460900  | -0.90100500 | 0.00054000  |
| H    | 4.78158600  | -0.19046000 | -0.00009900 |
| H    | 4.04543000  | -1.53870600 | 0.88269300  |
| H    | 4.04508000  | -1.53995300 | -0.88074200 |
| N    | 2.56583000  | 1.17070800  | 0.00008200  |
| H    | -0.62589900 | -1.85457800 | 0.00022000  |

TS3-BC

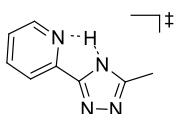

M06-2X/6-311+G(d,p)/SMD(DMSO)

Imaginary frequency: -1500.9010 cm<sup>-1</sup>

Cartesian coordinates

| ATOM | X           | Y           | Z           |
|------|-------------|-------------|-------------|
| C    | 0.58678100  | 0.57826300  | 0.00063100  |
| N    | 1.37163700  | 1.62787200  | -0.00200400 |
| N    | 1.25805700  | -0.59301300 | 0.00065100  |
| C    | -0.86766700 | 0.36404600  | 0.00080200  |
| C    | -1.91688100 | 1.26380500  | 0.00264700  |
| C    | -3.20737300 | 0.74000700  | 0.00184100  |
| H    | -1.72771500 | 2.32930300  | 0.00468600  |
| C    | -2.29969200 | -1.47744500 | -0.00209400 |
| C    | -3.40641000 | -0.63718700 | -0.00076300 |
| H    | -4.05920900 | 1.40970200  | 0.00323700  |
| H    | -2.38664400 | -2.55679200 | -0.00404300 |
| H    | -4.40191600 | -1.06018900 | -0.00170100 |
| N    | -1.07257400 | -0.96717400 | -0.00114900 |
| H    | 0.18207600  | -1.34414900 | -0.00089500 |
| C    | 2.55037700  | -0.20491000 | -0.00185400 |
| C    | 3.71736900  | -1.12859300 | 0.00310400  |
| H    | 4.64043100  | -0.55138200 | -0.04402400 |
| H    | 3.72788900  | -1.73478500 | 0.91149000  |
| H    | 3.68019300  | -1.80628500 | -0.85206800 |
| N    | 2.64372000  | 1.12183900  | -0.00357900 |

9b-B·H<sub>2</sub>O'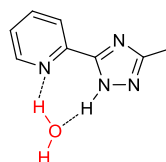

M06-2X/6-311+G(d,p)/SMD(DMSO)

Cartesian coordinates

| ATOM | X           | Y           | Z           |
|------|-------------|-------------|-------------|
| C    | 0.64288800  | -0.18375700 | 0.00180900  |
| N    | 1.56954900  | -1.13048600 | 0.00345600  |
| N    | 1.23309800  | 1.01956300  | -0.00115200 |
| C    | -0.81337600 | -0.40702200 | 0.00163900  |
| C    | -1.31069400 | -1.70750700 | 0.00520600  |
| C    | -2.68731900 | -1.88735700 | 0.00397200  |
| H    | -0.62684200 | -2.54629400 | 0.00862700  |
| C    | -2.92375900 | 0.48866900  | -0.00470500 |
| C    | -3.51312200 | -0.77057500 | -0.00103300 |
| H    | -3.10731200 | -2.88618100 | 0.00657500  |
| H    | -3.53418700 | 1.38578000  | -0.00920700 |
| H    | -4.59149300 | -0.86395200 | -0.00254200 |
| N    | -1.60309900 | 0.67431700  | -0.00325500 |
| H    | 0.80146600  | 1.94830300  | -0.00111600 |
| C    | 2.73787000  | -0.43588200 | 0.00115400  |
| C    | 4.07794700  | -1.08721500 | 0.00126500  |
| H    | 4.19501700  | -1.72006600 | 0.88302200  |
| H    | 4.19602500  | -1.71822900 | -0.88170100 |
| H    | 4.86275600  | -0.33145600 | 0.00236500  |
| N    | 2.57141400  | 0.87575700  | -0.00159300 |
| O    | -0.50305100 | 3.27822000  | -0.08383900 |
| H    | -0.73339700 | 3.87073700  | 0.63893700  |
| H    | -1.09697100 | 2.50543000  | -0.01227400 |

TS1-BC·H<sub>2</sub>O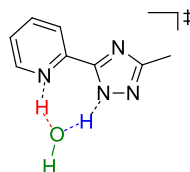

M06-2X/6-311+G(d,p)/SMD(DMSO)

Imaginary frequency: -1271.9375 cm<sup>-1</sup>

Cartesian coordinates

| ATOM | X           | Y           | Z           |
|------|-------------|-------------|-------------|
| C    | 0.65675700  | -0.12716200 | 0.00126000  |
| N    | 1.56331400  | -1.10966700 | 0.01461700  |
| N    | 1.23104500  | 1.07883800  | -0.02138900 |
| C    | -0.79755300 | -0.35022200 | 0.00240700  |
| C    | -1.32428500 | -1.63835600 | 0.01643500  |
| C    | -2.70131600 | -1.80357300 | 0.01225000  |
| H    | -0.65022300 | -2.48419300 | 0.02947700  |
| C    | -2.94452100 | 0.56584300  | -0.01946500 |
| C    | -3.53112000 | -0.68644600 | -0.00654800 |
| H    | -3.12614700 | -2.80024800 | 0.02277700  |
| H    | -3.52794200 | 1.47866700  | -0.03403300 |
| H    | -4.60872500 | -0.77858000 | -0.01160000 |
| N    | -1.61636900 | 0.71863400  | -0.01455800 |
| H    | 0.51254500  | 2.20201100  | -0.01945800 |
| C    | 2.72878900  | -0.42784900 | -0.00086900 |
| C    | 4.06988000  | -1.08281200 | 0.00467200  |
| H    | 4.19111500  | -1.71047100 | 0.88998400  |
| H    | 4.19399300  | -1.71930400 | -0.87399900 |
| H    | 4.85563300  | -0.32738000 | 0.00195400  |
| N    | 2.56449700  | 0.89366300  | -0.02173300 |
| O    | -0.41962200 | 2.88210300  | -0.05990500 |
| H    | -0.49381800 | 3.43538100  | 0.72688500  |

H -1.12664700 1.88048300 -0.01215300

### I1·H<sub>2</sub>O

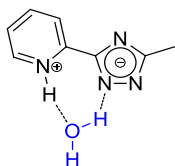

M06-2X/6-311+G(d,p)/SMD(DMSO)

Cartesian coordinates

| ATOM | X           | Y           | Z           |
|------|-------------|-------------|-------------|
| C    | 0.67091800  | -0.14938400 | 0.00223400  |
| N    | 1.58114100  | -1.13961900 | 0.01529800  |
| N    | 1.21655800  | 1.06768700  | -0.01868000 |
| C    | -0.76647500 | -0.39895800 | 0.00379400  |
| C    | -1.30111900 | -1.68522600 | 0.00484400  |
| C    | -2.67474500 | -1.85482300 | 0.00131900  |
| H    | -0.62336200 | -2.52759700 | 0.00690600  |
| C    | -2.95680100 | 0.50777100  | -0.00248700 |
| C    | -3.52248800 | -0.74546000 | -0.00286700 |
| H    | -3.09190100 | -2.85469800 | 0.00097300  |
| H    | -3.52698300 | 1.42703800  | -0.00511500 |
| H    | -4.59823400 | -0.85028800 | -0.00658500 |
| N    | -1.61987200 | 0.64621000  | 0.00098900  |
| H    | 0.34601000  | 2.64422000  | -0.02433300 |
| C    | 2.73369500  | -0.44983800 | 0.00116900  |
| C    | 4.08517000  | -1.08536000 | 0.00677400  |
| H    | 4.21568200  | -1.71617000 | 0.88873600  |
| H    | 4.22372600  | -1.71477700 | -0.87509200 |
| H    | 4.85954000  | -0.31794600 | 0.01050800  |
| N    | 2.54981100  | 0.87609800  | -0.01868400 |
| O    | -0.47522600 | 3.18886800  | -0.07615800 |
| H    | -0.45968400 | 3.79869000  | 0.66866300  |
| H    | -1.24539300 | 1.61561700  | 0.00346000  |

### TS2-rot·H<sub>2</sub>O

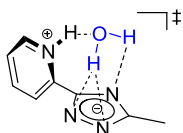

M06-2X/6-311+G(d,p)/SMD(DMSO)

Imaginary frequency: -68.8816 cm<sup>-1</sup>

Cartesian coordinates

| ATOM | X           | Y           | Z           |
|------|-------------|-------------|-------------|
| C    | -0.51492800 | -0.49675300 | 0.19059600  |
| N    | -1.35806400 | -0.46043100 | -0.85543600 |
| N    | -1.10776900 | -0.46999600 | 1.37655700  |
| C    | 0.95378700  | -0.39520500 | 0.04486000  |
| C    | 1.84201500  | -1.45526000 | 0.06778700  |
| C    | 3.20289900  | -1.20663400 | -0.08309600 |
| H    | 1.46298200  | -2.45982600 | 0.19834500  |
| C    | 2.74727300  | 1.12585800  | -0.26635400 |
| C    | 3.66363800  | 0.09469600  | -0.25361600 |
| H    | 3.90508300  | -2.03169800 | -0.06870200 |
| H    | 3.01005100  | 2.16817100  | -0.38529000 |
| H    | 4.71560200  | 0.31396500  | -0.37281600 |
| N    | 1.44421700  | 0.85133600  | -0.11920200 |
| H    | -1.26261700 | 1.96034600  | 0.95983400  |
| C    | -2.55404300 | -0.43302700 | -0.22558500 |
| C    | -3.86493800 | -0.40982100 | -0.94343000 |
| H    | -3.89910400 | 0.40771800  | -1.66683300 |
| H    | -4.02995000 | -1.34168200 | -1.48965200 |
| H    | -4.67983200 | -0.27998100 | -0.23053400 |

N -2.44293200 -0.43095400 1.10169400

O -0.89061000 2.49586100 0.24471100

H -1.45898700 2.29939400 -0.51117500

H 0.75926800 1.62389400 -0.10311900

### I2·H<sub>2</sub>O

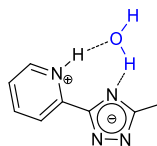

M06-2X/6-311+G(d,p)/SMD(DMSO)

Cartesian coordinates

| ATOM | X           | Y           | Z           |
|------|-------------|-------------|-------------|
| C    | -0.54693000 | -0.61953000 | -0.00002300 |
| N    | -1.45973600 | 0.37696500  | -0.01378400 |
| N    | -1.09238000 | -1.83177300 | 0.01516400  |
| C    | 0.89608100  | -0.41996400 | -0.00052600 |
| C    | 1.81009500  | -1.47320500 | 0.00758900  |
| C    | 3.16549600  | -1.19996800 | 0.00619400  |
| H    | 1.43523600  | -2.48727200 | 0.01470100  |
| C    | 2.69045200  | 1.13154400  | -0.01086600 |
| C    | 3.62121000  | 0.12132200  | -0.00381600 |
| H    | 3.87712300  | -2.01707400 | 0.01267100  |
| H    | 2.94095000  | 2.18391100  | -0.01781100 |
| H    | 4.67533000  | 0.36043400  | -0.00551700 |
| N    | 1.37693200  | 0.83994200  | -0.00881400 |
| H    | -0.69677400 | 3.50588600  | 0.68123000  |
| C    | -2.61529500 | -0.30730700 | -0.00492100 |
| C    | -3.96247100 | 0.33509100  | -0.01174200 |
| H    | -4.09895400 | 0.96455700  | 0.87053900  |
| H    | -4.08920200 | 0.96679400  | -0.89374900 |
| H    | -4.73970800 | -0.42925000 | -0.01657000 |
| N    | -2.42619400 | -1.63183800 | 0.01193100  |
| O    | -0.50530200 | 2.93328900  | -0.06857700 |
| H    | -1.11938000 | 2.16582200  | -0.01189600 |
| H    | 0.71560400  | 1.63890600  | -0.00778700 |

### TS3-BC·H<sub>2</sub>O

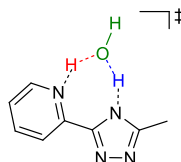

M06-2X/6-311+G(d,p)/SMD(DMSO)

Imaginary frequency: -1271.4869 cm<sup>-1</sup>

Cartesian coordinates

| ATOM | X           | Y           | Z           |
|------|-------------|-------------|-------------|
| C    | -0.55034900 | -0.57784300 | 0.00082000  |
| N    | -1.11589300 | -1.77152800 | 0.01447400  |
| N    | -1.47167700 | 0.41746900  | -0.01378000 |
| C    | 0.90541100  | -0.37329100 | -0.00001100 |
| C    | 1.78757400  | -1.45245700 | 0.01316700  |
| C    | 3.15114300  | -1.20773600 | 0.00975100  |
| H    | 1.39300100  | -2.45949900 | 0.02525800  |
| C    | 2.69236200  | 1.12883900  | -0.01908600 |
| C    | 3.61929100  | 0.10424900  | -0.00711200 |
| H    | 3.84884500  | -2.03683200 | 0.01968600  |
| H    | 2.98364900  | 2.17238800  | -0.03211200 |
| H    | 4.67691500  | 0.33074500  | -0.01089300 |
| N    | 1.37606400  | 0.88740000  | -0.01521000 |
| H    | -1.09023400 | 1.69599500  | -0.01444500 |
| O    | -0.39323500 | 2.61373400  | -0.06115000 |
| H    | -0.47341400 | 3.16588100  | 0.72626400  |



|   |             |             |             |
|---|-------------|-------------|-------------|
| H | 0.56052400  | 1.86999000  | -0.01440500 |
| N | -2.45736900 | -1.56010300 | 0.01001800  |
| C | -2.64505000 | -0.24586100 | -0.00640500 |
| C | -3.97857800 | 0.41942900  | -0.01343000 |
| H | -4.09387700 | 1.05188700  | -0.89610500 |
| H | -4.10353100 | 1.05014400  | 0.86929600  |
| H | -4.76470100 | -0.33521200 | -0.01801900 |

### 9b-C·H<sub>2</sub>O

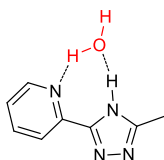

M06-2X/6-311+G(d,p)/SMD(DMSO)

Cartesian coordinates

| ATOM | X           | Y           | Z           |
|------|-------------|-------------|-------------|
| C    | 0.50793500  | -0.64681500 | 0.00223700  |
| N    | 1.07962900  | -1.82592500 | 0.00116900  |
| N    | 1.46183100  | 0.32310200  | 0.00205100  |
| C    | -0.94368000 | -0.40403400 | 0.00178200  |
| C    | -1.83009200 | -1.48038100 | 0.00695000  |
| C    | -3.19114100 | -1.21428000 | 0.00532900  |
| H    | -1.44989300 | -2.49366200 | 0.01193200  |
| C    | -2.66487000 | 1.11332400  | -0.00649600 |
| C    | -3.62228200 | 0.10755900  | -0.00143300 |
| H    | -3.90600800 | -2.02874800 | 0.00909300  |
| H    | -2.95783900 | 2.15811100  | -0.01242700 |
| H    | -4.67487000 | 0.35979000  | -0.00308000 |
| N    | -1.35193700 | 0.87046800  | -0.00497500 |
| H    | 1.32057800  | 1.33857300  | 0.00462800  |
| O    | 0.49368400  | 2.99756100  | -0.08375600 |
| H    | 0.44933300  | 3.63633600  | 0.63491500  |
| H    | -0.30792200 | 2.44107800  | -0.01452900 |
| C    | 2.64975000  | -0.33261400 | 0.00062500  |
| C    | 3.97455200  | 0.34140500  | 0.00009600  |
| H    | 4.08545000  | 0.97491000  | -0.88191900 |
| H    | 4.08948600  | 0.96849800  | 0.88618500  |
| H    | 4.75933100  | -0.41365200 | -0.00426900 |
| N    | 2.43359900  | -1.62860300 | -0.00039000 |

### 9b-B·2H<sub>2</sub>O'

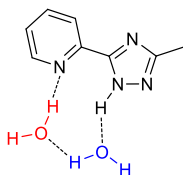

M06-2X/6-311+G(d,p)/SMD(DMSO)

Cartesian coordinates

| ATOM | X           | Y           | Z           |
|------|-------------|-------------|-------------|
| C    | -2.75280900 | -0.76362200 | 0.11166300  |
| C    | -0.66046300 | -0.54209100 | -0.03318900 |
| N    | -1.24511700 | 0.63153300  | -0.30269200 |
| H    | -0.83985000 | 1.52817700  | -0.60000700 |
| N    | -2.58292900 | 0.50554400  | -0.21720700 |
| N    | -1.58586800 | -1.45175100 | 0.23410700  |
| H    | 0.10396000  | 3.44205200  | -0.24246900 |
| O    | -0.42190700 | 3.23638300  | -1.03682100 |
| O    | 1.17698900  | 2.92129300  | 1.12600700  |
| H    | 0.91462000  | 2.89457400  | 2.05177300  |
| C    | 0.79462100  | -0.76487600 | -0.04721900 |
| C    | 1.29848600  | -2.05512800 | -0.18608400 |
| C    | 2.67597900  | -2.22550800 | -0.21811400 |

|   |             |             |             |
|---|-------------|-------------|-------------|
| H | 0.61857200  | -2.89265900 | -0.27524200 |
| C | 2.89986600  | 0.13853300  | 0.03151200  |
| C | 3.49550600  | -1.10885200 | -0.11345900 |
| H | 3.10156300  | -3.21588700 | -0.32828800 |
| H | 3.50614900  | 1.03303600  | 0.13143900  |
| H | 4.57426600  | -1.19438000 | -0.13682500 |
| C | -4.09259200 | -1.37471200 | 0.33839800  |
| H | -4.24971600 | -2.21681400 | -0.33823000 |
| H | -4.17296700 | -1.74801100 | 1.36126000  |
| H | -4.87511500 | -0.63538300 | 0.16972900  |
| N | 1.57755800  | 0.31498000  | 0.06829100  |
| H | -1.08384300 | 3.92989300  | -1.12299600 |
| H | 1.26463000  | 1.98938000  | 0.83781800  |

### TS1-BC·2H<sub>2</sub>O

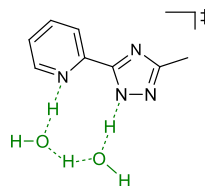

M06-2X/6-311+G(d,p)/SMD(DMSO)

Imaginary frequency: -779.1254 cm<sup>-1</sup>

Cartesian coordinates

| ATOM | X           | Y           | Z           |
|------|-------------|-------------|-------------|
| C    | -2.71620900 | -0.80932400 | 0.10451300  |
| C    | -0.65420400 | -0.45589500 | -0.02441100 |
| N    | -1.25915800 | 0.70822400  | -0.26679800 |
| H    | -0.94421300 | 2.06520600  | -0.63574600 |
| N    | -2.59063400 | 0.48344600  | -0.18276600 |
| N    | -1.53027900 | -1.44365000 | 0.20967500  |
| H    | 0.28272400  | 3.07700400  | 0.05160400  |
| O    | -0.63744400 | 3.09054400  | -0.79966900 |
| O    | 1.14792600  | 2.76792900  | 0.74082600  |
| H    | 0.92465200  | 2.89053400  | 1.67357200  |
| C    | 0.80268100  | -0.67097500 | -0.03147400 |
| C    | 1.31342400  | -1.95325600 | -0.23427900 |
| C    | 2.68633700  | -2.14201100 | -0.25449400 |
| H    | 0.62699900  | -2.77611800 | -0.38210600 |
| C    | 2.95091400  | 0.19086700  | 0.13251400  |
| C    | 3.52826100  | -1.04937400 | -0.07410300 |
| H    | 3.09662200  | -3.13206000 | -0.41517100 |
| H    | 3.55587800  | 1.07638300  | 0.29485300  |
| H    | 4.60519400  | -1.15127700 | -0.08642900 |
| C    | -4.03574000 | -1.47745900 | 0.30668300  |
| H    | -4.16202300 | -2.31256500 | -0.38558700 |
| H    | -4.11817800 | -1.87257700 | 1.32176600  |
| H    | -4.84434200 | -0.76445300 | 0.14383300  |
| N    | 1.62514700  | 0.37436300  | 0.15815000  |
| H    | -1.37046700 | 3.68741800  | -0.60641200 |
| H    | 1.29498800  | 1.69260900  | 0.51904500  |

### II·2H<sub>2</sub>O

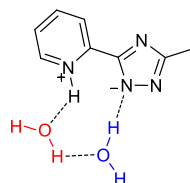

M06-2X/6-311+G(d,p)/SMD(DMSO)

Cartesian coordinates

| ATOM | X          | Y           | Z          |
|------|------------|-------------|------------|
| C    | 2.70510500 | -0.89301200 | 0.09226500 |

|   |             |             |             |
|---|-------------|-------------|-------------|
| C | 0.64821500  | -0.56357700 | 0.03105700  |
| N | 1.20723400  | 0.64535100  | 0.00781800  |
| H | -1.48034200 | 3.38928900  | 1.35271300  |
| N | 2.53957100  | 0.43418100  | 0.04835200  |
| N | 1.54232600  | -1.56660700 | 0.08185000  |
| H | -0.53127900 | 3.38100900  | 0.12212900  |
| O | -1.36890500 | 3.01661000  | 0.47176300  |
| H | -1.21365700 | 1.24036100  | 0.24257600  |
| O | 1.04578300  | 3.34122300  | -0.67600600 |
| H | 1.15138000  | 2.38804800  | -0.45503100 |
| H | 1.85244400  | 3.77808900  | -0.38592100 |
| C | -0.79238600 | -0.77751100 | -0.00655700 |
| C | -1.37291600 | -2.03458900 | -0.15288200 |
| C | -2.75218200 | -2.14765100 | -0.19664100 |
| H | -0.72861800 | -2.89897200 | -0.23533600 |
| C | -2.94467200 | 0.21059900  | 0.05587400  |
| C | -3.55728300 | -1.01147500 | -0.09615300 |
| H | -3.20727200 | -3.12397200 | -0.31332600 |
| H | -3.47694700 | 1.14767900  | 0.15073400  |
| H | -4.63589100 | -1.07245600 | -0.13087500 |
| C | 4.04725000  | -1.54631300 | 0.13733800  |
| H | 4.83114100  | -0.78875900 | 0.15274200  |
| H | 4.14968800  | -2.17165900 | 1.02675500  |
| H | 4.19757400  | -2.18440100 | -0.73641100 |
| N | -1.60484900 | 0.29196800  | 0.09874900  |

### TS2'-rot·2H<sub>2</sub>O

M06-2X/6-311+G(d,p)/SMD(DMSO)

Imaginary frequency: -38.9111 cm<sup>-1</sup>

Cartesian coordinates

| ATOM | X           | Y           | Z           |
|------|-------------|-------------|-------------|
| C    | -2.60216800 | -0.74707300 | -0.16641100 |
| C    | -0.54796700 | -0.43405400 | -0.35324000 |
| N    | -1.12475000 | 0.51811900  | -1.08731900 |
| H    | -0.47680400 | 2.41044000  | -0.99542900 |
| N    | -2.45304300 | 0.31279200  | -0.97014700 |
| N    | -1.42786400 | -1.25622600 | 0.25118600  |
| H    | -0.12835600 | 2.81626900  | 0.41679000  |
| O    | 0.17100500  | 2.93968000  | -0.49873000 |
| H    | 1.17788800  | 1.45564200  | -0.55916900 |
| O    | -0.68610200 | 1.73817200  | 1.91798300  |
| H    | -1.09888700 | 0.89566200  | 1.69041400  |
| H    | -1.08055300 | 1.99901700  | 2.75786100  |
| C    | 0.89792100  | -0.54989000 | -0.18483700 |
| C    | 1.53316800  | -1.73499700 | 0.17196100  |
| C    | 2.91262900  | -1.75600300 | 0.29877400  |
| H    | 0.93367600  | -2.62069100 | 0.33231600  |
| C    | 2.99220600  | 0.55637100  | -0.26343100 |
| C    | 3.65959700  | -0.59923900 | 0.07164100  |
| H    | 3.41347800  | -2.67762400 | 0.57037600  |
| H    | 3.47951700  | 1.50625200  | -0.43829000 |
| H    | 4.73676600  | -0.59054800 | 0.16143600  |
| C    | -3.93521300 | -1.27775000 | 0.24622200  |
| H    | -4.72653500 | -0.75929500 | -0.29588500 |
| H    | -4.01248400 | -2.34736900 | 0.04147100  |
| H    | -4.09674500 | -1.13118300 | 1.31688400  |
| N    | 1.65405300  | 0.55051800  | -0.37612900 |

### I2·2H<sub>2</sub>O

M06-2X/6-311+G(d,p)/SMD(DMSO)

Cartesian coordinates

| ATOM | X           | Y           | Z           |
|------|-------------|-------------|-------------|
| C    | -2.56562200 | -0.72451000 | -0.20244900 |
| C    | -0.51091500 | -0.42791300 | -0.40827900 |
| N    | -1.08202900 | 0.45506300  | -1.22489400 |
| H    | -0.57807400 | 2.49350200  | -0.90891100 |
| N    | -2.41236000 | 0.25907000  | -1.09560300 |

|   |             |             |             |
|---|-------------|-------------|-------------|
| N | -1.39236100 | -1.19429100 | 0.26542800  |
| H | -0.28634700 | 2.59536300  | 0.57171500  |
| O | 0.04007400  | 2.90886800  | -0.28938200 |
| H | 1.16574000  | 1.48495200  | -0.59863300 |
| O | -0.84896800 | 1.45514900  | 1.98250300  |
| H | -1.13666500 | 0.56680600  | 1.73098800  |
| H | -1.40652600 | 1.70888800  | 2.72646600  |
| C | 0.93353600  | -0.51519300 | -0.21212300 |
| C | 1.58863000  | -1.67614900 | 0.18443900  |
| C | 2.96639000  | -1.66271700 | 0.33175700  |
| H | 1.00666500  | -2.57097200 | 0.35852800  |
| C | 3.00361300  | 0.63733600  | -0.28608100 |
| C | 3.69081700  | -0.49598200 | 0.08392700  |
| H | 3.48332800  | -2.56550400 | 0.63462400  |
| H | 3.47195100  | 1.59433000  | -0.47285500 |
| H | 4.76618400  | -0.46165600 | 0.18804200  |
| C | -3.89902700 | -1.22316900 | 0.24747800  |
| H | -4.69196100 | -0.70890300 | -0.29615400 |
| H | -3.99481700 | -2.29689400 | 0.07290400  |
| H | -4.03827000 | -1.04467300 | 1.31635000  |
| N | 1.66752400  | 0.59764400  | -0.41636500 |

### TS2-rot·2H<sub>2</sub>O

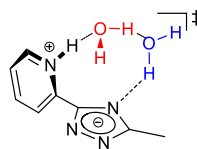

M06-2X/6-311+G(d,p)/SMD(DMSO)

Imaginary frequency: -78.2570 cm<sup>-1</sup>

Cartesian coordinates

| ATOM | X           | Y           | Z           |
|------|-------------|-------------|-------------|
| C    | -2.52754000 | -0.69652400 | 0.04774800  |
| C    | -0.45665900 | -0.76788300 | -0.21373300 |
| N    | -0.96611700 | -1.24898500 | -1.33567500 |
| H    | -1.04306400 | 2.32096200  | -1.71797100 |
| N    | -2.31766700 | -1.20862900 | -1.15975900 |
| N    | -1.37784800 | -0.39840800 | 0.69703700  |
| H    | -0.61853000 | 2.52837700  | -0.23722900 |
| O    | -0.27575000 | 2.45917700  | -1.15189300 |
| H    | 0.92121800  | 1.18592700  | -1.01871300 |
| O    | -0.91648100 | 2.21538300  | 1.48726300  |
| H    | -1.14768200 | 1.26100700  | 1.43852600  |
| H    | -1.56416300 | 2.63277200  | 2.06382700  |
| C    | 1.00023500  | -0.59635700 | -0.01783100 |
| C    | 1.81182400  | -1.47819100 | 0.67498300  |
| C    | 3.17543000  | -1.21915700 | 0.76875600  |
| H    | 1.37282700  | -2.35789200 | 1.12593400  |
| C    | 2.86980200  | 0.77490100  | -0.49990300 |
| C    | 3.71480300  | -0.08533500 | 0.17028100  |
| H    | 3.81829500  | -1.90647900 | 1.30550800  |
| H    | 3.19458900  | 1.68688000  | -0.98266900 |
| H    | 4.77131500  | 0.13777700  | 0.22468700  |
| C    | -3.88267300 | -0.46106000 | 0.63017500  |
| H    | -4.65158300 | -0.78744500 | -0.07060800 |
| H    | -4.00689300 | -1.01042000 | 1.56597200  |
| H    | -4.03521300 | 0.59995500  | 0.84392400  |
| N    | 1.56097500  | 0.49741300  | -0.57117500 |

### I3·2H<sub>2</sub>O

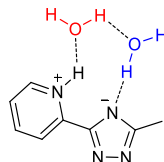

M06-2X/6-311+G(d,p)/SMD(DMSO)

Cartesian coordinates

| ATOM | X           | Y           | Z           |
|------|-------------|-------------|-------------|
| C    | -2.43075500 | -0.88677700 | -0.10319700 |
| C    | -0.34459800 | -0.99282500 | -0.03514700 |
| N    | -0.76308000 | -2.24880400 | -0.14615300 |
| H    | 0.06222400  | 3.41093400  | -1.44411200 |
| N    | -2.10996000 | -2.18122900 | -0.19047900 |
| N    | -1.34948300 | -0.09116500 | -0.00530800 |
| H    | -0.67911000 | 3.11766000  | -0.11047900 |
| O    | 0.19297800  | 3.07644000  | -0.55061500 |
| H    | 0.70455400  | 1.36732800  | -0.27886100 |
| O    | -2.03979500 | 2.49257800  | 0.83280800  |
| H    | -1.82951200 | 1.56692400  | 0.57217900  |
| H    | -2.97329200 | 2.62253800  | 0.63737200  |
| C    | 1.06965300  | -0.65257700 | 0.01770600  |
| C    | 2.07940500  | -1.59782400 | 0.18987500  |
| C    | 3.39915000  | -1.18531600 | 0.22568800  |
| H    | 1.80525000  | -2.63821800 | 0.29740300  |
| C    | 2.69647600  | 1.06823300  | -0.07847800 |
| C    | 3.72061100  | 0.16847100  | 0.09480300  |
| H    | 4.18682200  | -1.91706200 | 0.35983100  |
| H    | 2.83905400  | 2.13400400  | -0.19763600 |
| H    | 4.74372200  | 0.51592500  | 0.12255600  |
| C    | -3.83695000 | -0.38520700 | -0.09920000 |
| H    | -4.52156400 | -1.20820300 | -0.30603400 |
| H    | -4.10135000 | 0.04240600  | 0.87160200  |
| H    | -3.97967700 | 0.38583500  | -0.85969800 |
| N    | 1.42244600  | 0.63987200  | -0.11434100 |

### TS3-BC·2H<sub>2</sub>O

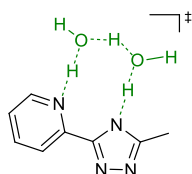

M06-2X/6-311+G(d,p)/SMD(DMSO)

Imaginary frequency: -805.8607 cm<sup>-1</sup>

Cartesian coordinates

| ATOM | X           | Y           | Z           |
|------|-------------|-------------|-------------|
| C    | 2.51142800  | -0.77590600 | 0.02591800  |
| C    | 0.40196200  | -0.87868800 | 0.09458300  |
| N    | 0.84521500  | -2.08663100 | 0.40640100  |
| H    | 0.02975200  | 2.88132200  | 1.63616700  |
| N    | 2.20109400  | -2.01999200 | 0.36681900  |
| N    | 1.41252500  | -0.01213500 | -0.15646600 |
| H    | 0.72815500  | 2.76409000  | 0.01680800  |
| O    | -0.20663600 | 2.80486500  | 0.70179200  |
| H    | -0.70011200 | 1.84215700  | 0.51215600  |
| O    | 1.59737500  | 2.42355800  | -0.79867700 |
| H    | 1.56194300  | 1.36381900  | -0.58477900 |
| H    | 2.48270400  | 2.76673900  | -0.62441700 |
| C    | -1.03619000 | -0.57802700 | 0.00842300  |
| C    | -1.95072000 | -1.60755800 | -0.22266100 |
| C    | -3.30053700 | -1.30900200 | -0.31070800 |
| H    | -1.58785800 | -2.61948500 | -0.34216000 |
| C    | -2.75707800 | 0.97731900  | 0.05973500  |
| C    | -3.71876200 | 0.01138200  | -0.17402100 |
| H    | -4.02036300 | -2.09798100 | -0.49421000 |
| H    | -3.02309400 | 2.02152000  | 0.18487400  |
| H    | -4.76201700 | 0.28921600  | -0.24390000 |
| C    | 3.90434000  | -0.27283400 | -0.15845200 |
| H    | 4.61332000  | -1.07891900 | 0.03061700  |
| H    | 4.05611900  | 0.09075800  | -1.17759300 |
| H    | 4.12271700  | 0.54830700  | 0.52861400  |

N -1.45223800 0.69032300 0.15410400

### 9b-C·2H<sub>2</sub>O

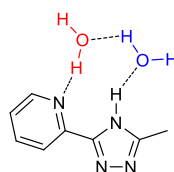

M06-2X/6-311+G(d,p)/SMD(DMSO)

Cartesian coordinates

| ATOM | X           | Y           | Z           |
|------|-------------|-------------|-------------|
| C    | 2.49124600  | -0.87387000 | 0.02193500  |
| C    | 0.33359500  | -0.98621400 | 0.09713400  |
| N    | 0.79945000  | -2.16119900 | 0.44180600  |
| H    | 0.14173600  | 2.88586500  | 2.00555700  |
| N    | 2.16591700  | -2.09018200 | 0.39698200  |
| N    | 1.36421000  | -0.14272700 | -0.17132700 |
| H    | 1.19784700  | 2.97065000  | -0.24986600 |
| O    | -0.04926900 | 2.96735300  | 1.06563400  |
| H    | -0.48119200 | 2.12956100  | 0.79853800  |
| O    | 1.64077300  | 2.54893500  | -1.00919700 |
| H    | 1.33832600  | 0.82613600  | -0.51413700 |
| H    | 2.53110200  | 2.91292500  | -1.05149400 |
| C    | -1.08772800 | -0.62376000 | -0.00517900 |
| C    | -2.05312500 | -1.61594500 | -0.16295800 |
| C    | -3.38166700 | -1.23223900 | -0.27445900 |
| H    | -1.75578200 | -2.65579500 | -0.20738200 |
| C    | -2.66876000 | 1.03636200  | -0.06644200 |
| C    | -3.69951400 | 0.12024100  | -0.23221400 |
| H    | -4.15692800 | -1.97867900 | -0.40125000 |
| H    | -2.87645600 | 2.10048600  | -0.01687000 |
| H    | -4.72166300 | 0.46474000  | -0.32228000 |
| C    | 3.86649600  | -0.34727000 | -0.18024100 |
| H    | 4.58647800  | -1.13334700 | 0.04348200  |
| H    | 4.00643800  | -0.02196500 | -1.21315500 |
| H    | 4.05560800  | 0.50516300  | 0.47530100  |
| N    | -1.38683700 | 0.67983900  | 0.04919700  |

### 9b-A-I·DMSO

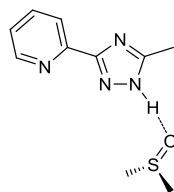

B3LYP/6-311+G(2d,p)/SMD(DMSO)

Cartesian coordinates

| ATOM | X           | Y           | Z           |
|------|-------------|-------------|-------------|
| C    | 0.10007300  | 2.13138700  | 0.09404000  |
| N    | 1.40511900  | 1.90016900  | 0.00235300  |
| N    | -0.54886500 | 0.95855600  | 0.17719000  |
| C    | -0.56308300 | 3.46300800  | 0.10244500  |
| H    | -1.56569900 | 0.77022900  | 0.24726900  |
| O    | -3.24998600 | 0.36261000  | 0.41060200  |
| S    | -3.84683400 | -0.81007600 | -0.37647500 |
| C    | -4.13055400 | -2.13408800 | 0.82746100  |
| H    | -4.65821100 | -2.94786500 | 0.32768500  |
| H    | -3.15157800 | -2.47797700 | 1.16036100  |
| H    | -4.70959900 | -1.74408800 | 1.66482900  |
| N    | 0.32677200  | -0.07261100 | 0.13706500  |
| C    | 1.49903700  | 0.53943300  | 0.02908200  |
| C    | -5.57480300 | -0.36575900 | -0.68587100 |
| H    | -6.04428500 | -0.07042300 | 0.25265500  |

|   |             |             |             |
|---|-------------|-------------|-------------|
| H | -5.57212900 | 0.46171300  | -1.39483700 |
| H | -6.08023400 | -1.22701900 | -1.12503100 |
| C | 2.78545300  | -0.17844200 | -0.02781900 |
| C | 3.98783300  | 0.53302900  | -0.06079300 |
| N | 2.74663500  | -1.52051000 | -0.04145600 |
| C | 5.18272100  | -0.17078500 | -0.10713100 |
| H | 3.97698600  | 1.61418600  | -0.04804900 |
| C | 3.90345700  | -2.18312200 | -0.08504900 |
| C | 5.14623800  | -1.55939900 | -0.11920500 |
| H | 6.12772300  | 0.35880600  | -0.13221700 |
| H | 3.83503300  | -3.26669700 | -0.09430200 |
| H | 6.05330300  | -2.14956900 | -0.15400800 |
| H | -1.58102100 | 3.39115400  | 0.48623200  |
| H | 0.00075900  | 4.15762900  | 0.72646400  |
| H | -0.60767700 | 3.87946800  | -0.90728400 |

### 9b-B-I-DMSO

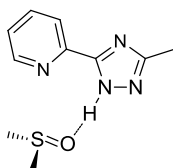

M06-2X/6-311+G(d,p)/SMD(DMSO)

Cartesian coordinates

| ATOM | X           | Y           | Z           |
|------|-------------|-------------|-------------|
| C    | -1.66861100 | -0.02995100 | -0.00119700 |
| N    | -2.97788100 | -0.24888200 | 0.02185000  |
| N    | -1.00944800 | -1.19259000 | 0.00512400  |
| C    | -0.99435600 | 1.27741700  | -0.03552400 |
| C    | -1.73658600 | 2.45563800  | -0.07640400 |
| C    | -1.05029900 | 3.66169200  | -0.12224800 |
| H    | -2.81849100 | 2.41575800  | -0.07458500 |
| C    | 0.98671500  | 2.41435300  | -0.08035000 |
| C    | 0.33916000  | 3.64532500  | -0.12710300 |
| H    | -1.59279100 | 4.59920700  | -0.15563900 |
| H    | 2.07237400  | 2.36552500  | -0.07992000 |
| H    | 0.91499700  | 4.56133200  | -0.16481500 |
| N    | 0.34279600  | 1.24932600  | -0.03314300 |
| H    | 0.02281500  | -1.36669300 | -0.00686200 |
| O    | 1.60258300  | -1.82638300 | 0.00708300  |
| S    | 2.71557200  | -0.81524800 | -0.32081700 |
| C    | 3.17339000  | -0.08077800 | 1.25615200  |
| H    | 4.01808400  | 0.59206000  | 1.10004500  |
| H    | 2.30695600  | 0.47462100  | 1.61294300  |
| H    | 3.43289100  | -0.87967700 | 1.95222900  |
| N    | -1.88996800 | -2.21008900 | 0.03225100  |
| C    | -3.06704700 | -1.60492500 | 0.04235900  |
| C    | -4.36091000 | -2.34332400 | 0.06873400  |
| H    | -4.17776900 | -3.41760600 | 0.07819800  |
| H    | -4.93742600 | -2.07586600 | 0.95666900  |
| H    | -4.96237600 | -2.09543400 | -0.80819500 |
| C    | 4.18103700  | -1.83242700 | -0.54528300 |
| H    | 4.28809600  | -2.49097600 | 0.31723400  |
| H    | 4.04148500  | -2.41154900 | -1.45762000 |
| H    | 5.04787200  | -1.17815600 | -0.65065900 |

B3LYP/6-311+G(2d,p)/SMD(DMSO)

Cartesian coordinates

| ATOM | X           | Y           | Z           |
|------|-------------|-------------|-------------|
| C    | -1.67215400 | -0.24167200 | 0.00438700  |
| N    | -2.90989200 | -0.73497500 | 0.02771000  |
| N    | -0.78681200 | -1.24906800 | 0.01267900  |
| C    | -1.30368300 | 1.17872400  | -0.03415600 |
| C    | -2.28657800 | 2.16743400  | -0.10062300 |
| C    | -1.88834700 | 3.49579200  | -0.14187800 |
| H    | -3.33256300 | 1.89292000  | -0.12028500 |

|   |             |             |             |
|---|-------------|-------------|-------------|
| C | 0.37530900  | 2.73945100  | -0.04848100 |
| C | -0.53114400 | 3.79287200  | -0.11632400 |
| H | -2.62716800 | 4.28654600  | -0.19432900 |
| H | 1.44279900  | 2.93552600  | -0.02609800 |
| H | -0.17662500 | 4.81531900  | -0.14821600 |
| N | 0.00895200  | 1.45800000  | -0.00704300 |
| H | 0.24946700  | -1.22703700 | -0.00052000 |
| O | 1.95591000  | -1.57736500 | 0.03106700  |
| S | 2.96755700  | -0.47783000 | -0.30732900 |
| C | 3.44717300  | 0.27378200  | 1.27026900  |
| H | 4.25525200  | 0.98301600  | 1.08459600  |
| H | 2.57215800  | 0.79720700  | 1.65308000  |
| H | 3.76294000  | -0.50856000 | 1.96100600  |
| N | -1.44260700 | -2.43532900 | 0.04130900  |
| C | -2.72259300 | -2.08165300 | 0.04945600  |
| C | -3.84095500 | -3.06555300 | 0.08067800  |
| H | -3.45359500 | -4.08401500 | 0.05496600  |
| H | -4.43969500 | -2.94345000 | 0.98679000  |
| H | -4.50542700 | -2.92175900 | -0.77457800 |
| C | 4.52187900  | -1.34403800 | -0.65281400 |
| H | 4.76132800  | -2.00728100 | 0.17868800  |
| H | 4.37438600  | -1.91367100 | -1.56998400 |
| H | 5.30763100  | -0.60180600 | -0.80205600 |

### 9b-C-I-DMSO

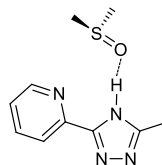

B3LYP/6-311+G(2d,p)/SMD(DMSO)

Cartesian coordinates

| ATOM | X           | Y           | Z           |
|------|-------------|-------------|-------------|
| C    | 1.67774400  | 0.86829900  | -0.01094200 |
| N    | 2.65337000  | 1.75322100  | -0.01868300 |
| N    | 0.47648200  | 1.50879900  | 0.03656400  |
| C    | 1.83922600  | -0.58961200 | -0.04033300 |
| C    | 3.10891100  | -1.16800900 | -0.12228500 |
| C    | 3.20692100  | -2.55051600 | -0.14009800 |
| H    | 3.98984200  | -0.54212100 | -0.17095000 |
| C    | 0.82564700  | -2.64727300 | -0.00130900 |
| C    | 2.04414400  | -3.31121300 | -0.07828700 |
| H    | 4.17725500  | -3.02847400 | -0.20195000 |
| H    | -0.10273300 | -3.20775300 | 0.04725100  |
| H    | 2.07617000  | -4.39338700 | -0.08921700 |
| N    | 0.71395900  | -1.31739200 | 0.01912000  |
| H    | -0.47231500 | 1.09121900  | 0.04321000  |
| O    | -2.19999300 | 0.77002400  | 0.08508200  |
| S    | -2.72315200 | -0.60966100 | -0.32621600 |
| C    | -2.92566500 | -1.55461100 | 1.20787100  |
| H    | -3.38529200 | -2.51405900 | 0.96604000  |
| H    | -1.92995300 | -1.71125200 | 1.62001000  |
| H    | -3.54610600 | -0.98676900 | 1.90173600  |
| C    | -4.47964800 | -0.36571700 | -0.69944200 |
| H    | -4.95878300 | 0.14866200  | 0.13377200  |
| H    | -4.53707700 | 0.23353900  | -1.60776000 |
| H    | -4.93625600 | -1.34169800 | -0.87212400 |
| N    | 2.07423600  | 3.00359100  | 0.02589300  |
| C    | 0.76628500  | 2.83494400  | 0.05767000  |
| C    | -0.24814600 | 3.91858900  | 0.13599300  |
| H    | -0.94710000 | 3.87197500  | -0.70220300 |
| H    | -0.82954500 | 3.84212300  | 1.05813100  |
| H    | 0.25343600  | 4.88555300  | 0.11957000  |

### 9b-A·3H<sub>2</sub>O

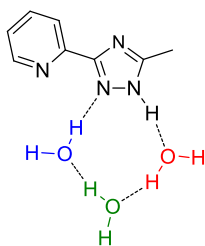

M06-2X/6-311+G(d,p)/SMD(DMSO)

Cartesian coordinates

| ATOM | X           | Y           | Z           |
|------|-------------|-------------|-------------|
| C    | -1.04320900 | 2.18524400  | -0.05024700 |
| C    | 0.56328300  | 0.81908600  | -0.04253000 |
| N    | -0.57885400 | 0.13722900  | -0.15955900 |
| H    | -0.72965800 | -0.88367400 | -0.23805400 |
| N    | -1.61491900 | 0.99668500  | -0.16486200 |
| N    | 0.31030000  | 2.12009700  | 0.02562900  |
| O    | -1.25015000 | -2.53636200 | -0.39467900 |
| O    | -4.23983400 | -0.02227700 | 0.10706500  |
| H    | -3.35761600 | 0.39066300  | -0.00311700 |
| H    | -4.68806600 | 0.48741300  | 0.78982200  |
| C    | 1.87981600  | 0.16392600  | 0.00526000  |
| C    | 3.04697200  | 0.91967300  | 0.06796700  |
| C    | 4.25990400  | 0.24444500  | 0.11597300  |
| H    | 2.99529500  | 2.00111700  | 0.07823100  |
| C    | 3.03304500  | -1.80604500 | 0.03241700  |
| C    | 4.25677400  | -1.14441800 | 0.09779400  |
| H    | 5.19161200  | 0.79550400  | 0.16614000  |
| H    | 2.99512200  | -2.89061500 | 0.01708700  |
| H    | 5.17854300  | -1.71122500 | 0.13340200  |
| N    | 1.86221500  | -1.17319900 | -0.01157000 |
| C    | -1.81544600 | 3.45779200  | -0.01689800 |
| H    | -1.56456900 | 4.07918900  | -0.87894200 |
| H    | -2.88512800 | 3.24871600  | -0.03339100 |
| H    | -1.57769700 | 4.02353700  | 0.88574400  |
| H    | -4.12508100 | -1.77810300 | 0.24753000  |
| O    | -3.88400200 | -2.72550800 | 0.29384800  |
| H    | -4.53476800 | -3.19620700 | -0.23633900 |
| H    | -2.16980900 | -2.74650500 | -0.13570400 |
| H    | -0.67431500 | -3.15054800 | 0.07184100  |

### 9b-B·3H<sub>2</sub>O

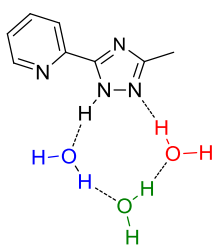

M06-2X/6-311+G(d,p)/SMD(DMSO)

Cartesian coordinates

| ATOM | X           | Y           | Z           |
|------|-------------|-------------|-------------|
| C    | 1.10993000  | 2.26309500  | 0.02939300  |
| C    | -0.42970100 | 0.82109700  | 0.00507400  |
| N    | 0.67826900  | 0.10343400  | 0.02871000  |
| H    | 0.75217900  | -1.74797200 | 0.23959700  |
| N    | 1.64458000  | 1.03537000  | 0.04466300  |
| N    | -0.21353900 | 2.16069100  | 0.00707800  |
| O    | 0.92566900  | -2.70720200 | 0.32360300  |
| O    | 4.15195000  | -0.18829700 | -0.06156200 |
| H    | 2.63219100  | 0.74172100  | 0.03053000  |
| H    | 4.82824500  | 0.02398900  | -0.71270900 |
| C    | -1.76883300 | 0.19919900  | -0.02015100 |
| C    | -2.91390600 | 0.99282300  | 0.01420900  |

|   |             |             |             |
|---|-------------|-------------|-------------|
| C | -4.15320000 | 0.36597400  | -0.00853400 |
| H | -2.82472100 | 2.07079100  | 0.05835900  |
| C | -3.00246300 | -1.72430300 | -0.09487800 |
| C | -4.20338000 | -1.02084700 | -0.06324700 |
| H | -5.06414400 | 0.95258600  | 0.01721100  |
| H | -3.00435700 | -2.80919700 | -0.13913300 |
| H | -5.14591800 | -1.55329100 | -0.08231900 |
| N | -1.80682300 | -1.13768700 | -0.07542000 |
| C | 1.91195100  | 3.51492400  | 0.03690600  |
| H | 1.67211400  | 4.10888800  | 0.92027800  |
| H | 2.97747200  | 3.28435800  | 0.04483600  |
| H | 1.68480200  | 4.11210800  | -0.84744000 |
| H | 4.02526200  | -1.15862800 | -0.10564900 |
| O | 3.58624900  | -2.86445400 | -0.17261700 |
| H | 4.00311700  | -3.47844800 | 0.44021700  |
| H | 2.62159500  | -2.95027500 | -0.02837200 |
| H | 0.11142400  | -3.12145000 | 0.02135200  |

### TS-AB·3H<sub>2</sub>O

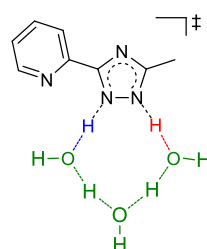

M06-2X/6-311+G(d,p)/SMD(DMSO)

Imaginary frequency: -329.9241 cm<sup>-1</sup>

Cartesian coordinates

| ATOM | X           | Y           | Z           |
|------|-------------|-------------|-------------|
| C    | -1.24474400 | 2.12103400  | -0.04280400 |
| C    | 0.38669100  | 0.79979000  | -0.03169300 |
| N    | -0.69721200 | 0.03812900  | -0.10302500 |
| H    | -0.77898100 | -1.51102600 | -0.28101400 |
| N    | -1.74883200 | 0.88879500  | -0.10992300 |
| N    | 0.09802900  | 2.11471400  | 0.00415000  |
| O    | -0.96182000 | -2.52486400 | -0.38096300 |
| O    | -3.95208100 | -0.37686500 | 0.15799500  |
| H    | -3.09249700 | 0.22630300  | 0.03751300  |
| H    | -4.42580100 | -0.07990900 | 0.94449700  |
| C    | 1.74722100  | 0.23211700  | 0.01172200  |
| C    | 2.86556400  | 1.06615300  | -0.01198000 |
| C    | 4.12667000  | 0.48767600  | 0.02830300  |
| H    | 2.73572500  | 2.13976000  | -0.06201900 |
| C    | 3.05580300  | -1.64391400 | 0.10896000  |
| C    | 4.22962400  | -0.89693600 | 0.08859500  |
| H    | 5.01504800  | 1.10851200  | 0.01118300  |
| H    | 3.09821100  | -2.72783000 | 0.15809700  |
| H    | 5.19137200  | -1.39316200 | 0.12085800  |
| N    | 1.83807200  | -1.10359900 | 0.07403200  |
| C    | -2.09160400 | 3.34958200  | -0.02643200 |
| H    | -1.87750000 | 3.97877000  | -0.89286500 |
| H    | -3.14765700 | 3.07813300  | -0.04659400 |
| H    | -1.89941900 | 3.94065200  | 0.87117200  |
| H    | -3.65186000 | -1.64479600 | 0.17802100  |
| O    | -3.30615200 | -2.70506800 | 0.17161300  |
| H    | -3.80016000 | -3.22509300 | -0.47719800 |
| H    | -2.22960500 | -2.71953900 | -0.05628500 |
| H    | -0.25820100 | -2.97567500 | 0.10080900  |

**9b-A·4H<sub>2</sub>O**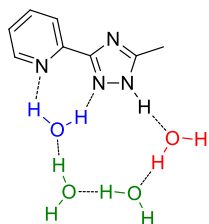

M06-2X/6-311+G(d,p)/SMD(DMSO)

Cartesian coordinates

| ATOM | X           | Y           | Z           |
|------|-------------|-------------|-------------|
| C    | -0.40288500 | 2.63783300  | -0.10189900 |
| C    | 0.83429900  | 0.93422100  | 0.04226000  |
| N    | -0.36478800 | 0.48498300  | 0.36810800  |
| H    | -0.93860300 | -1.35305900 | 0.82570400  |
| N    | -1.13547400 | 1.57987900  | 0.26959200  |
| N    | 0.85926800  | 2.25990900  | -0.25237400 |
| O    | -0.72804900 | -2.30163000 | 0.80107500  |
| H    | 0.20257000  | -2.23868700 | 0.52071200  |
| O    | -3.82575400 | 0.99755400  | 0.62391800  |
| H    | -2.14870700 | 1.50435100  | 0.44406600  |
| H    | -4.32511600 | 1.04310600  | 1.44515900  |
| C    | 2.04306200  | 0.08295200  | -0.00279800 |
| C    | 3.29183300  | 0.67007100  | -0.20278700 |
| C    | 4.41309200  | -0.14720200 | -0.24940500 |
| H    | 3.37026700  | 1.74327400  | -0.31703500 |
| C    | 2.96856500  | -2.01255500 | 0.10027100  |
| C    | 4.25343700  | -1.51806700 | -0.09497700 |
| H    | 5.39625200  | 0.28220000  | -0.40304800 |
| H    | 2.80173400  | -3.07810400 | 0.22387800  |
| H    | 5.09775800  | -2.19496400 | -0.12429100 |
| N    | 1.88348200  | -1.23893900 | 0.14515700  |
| C    | -0.96055900 | 4.00126400  | -0.30503600 |
| H    | -0.77844300 | 4.33277600  | -1.32827900 |
| H    | -2.03438400 | 4.00454800  | -0.11782800 |
| H    | -0.48094600 | 4.70826500  | 0.37359200  |
| H    | -4.10890800 | 0.17454700  | 0.17397000  |
| O    | -4.58020700 | -1.30423900 | -0.62424700 |
| H    | -4.95957900 | -1.26609600 | -1.50779400 |
| H    | -3.97233000 | -2.07299800 | -0.62024800 |
| O    | -2.79540300 | -3.36664200 | -0.56861900 |
| H    | -1.98524700 | -3.07223600 | -0.09723700 |
| H    | -3.04350600 | -4.20919000 | -0.17548700 |

**9b-B·4H<sub>2</sub>O**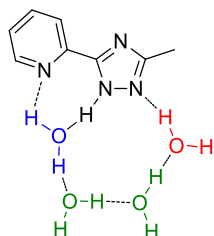

M06-2X/6-311+G(d,p)/SMD(DMSO)

Cartesian coordinates

| ATOM | X           | Y           | Z           |
|------|-------------|-------------|-------------|
| C    | -0.50595600 | 2.57606500  | -0.03466700 |
| C    | 0.86868900  | 0.97735800  | 0.04312600  |
| N    | -0.33744700 | 0.52570900  | 0.40052000  |
| H    | -0.61448800 | -0.43335200 | 0.67967400  |
| N    | -1.22580400 | 1.53574600  | 0.35578700  |
| N    | 0.80047800  | 2.27252600  | -0.23772200 |

|   |             |             |             |
|---|-------------|-------------|-------------|
| O | -0.71056600 | -2.12401200 | 1.04669800  |
| H | 0.19197100  | -2.20856000 | 0.70303900  |
| O | -3.97933000 | 0.91523600  | 0.42793100  |
| H | -3.03649000 | 1.18144400  | 0.44699600  |
| H | -4.33603500 | 1.12862900  | 1.29618500  |
| C | 2.07615300  | 0.13535400  | -0.02362000 |
| C | 3.30741300  | 0.71058900  | -0.32494400 |
| C | 4.42223100  | -0.11528100 | -0.38511600 |
| H | 3.37680300  | 1.77557300  | -0.50561000 |
| C | 2.99436300  | -1.95377900 | 0.15168400  |
| C | 4.26678300  | -1.47378400 | -0.14243000 |
| H | 5.39667600  | 0.29789300  | -0.61740300 |
| H | 2.83443100  | -3.00931400 | 0.34661900  |
| H | 5.10759200  | -2.15471600 | -0.17797000 |
| N | 1.91555000  | -1.17320300 | 0.21044700  |
| C | -1.08106600 | 3.93495700  | -0.23260800 |
| H | -0.92557500 | 4.26675300  | -1.26079900 |
| H | -2.15019200 | 3.92452000  | -0.02116700 |
| H | -0.59556300 | 4.65371200  | 0.43023700  |
| H | -4.35857700 | -0.63398400 | -0.31103600 |
| O | -4.54291800 | -1.49601500 | -0.73603700 |
| H | -4.98346000 | -1.29346800 | -1.56720600 |
| H | -3.30591900 | -2.74576100 | -0.64720400 |
| O | -2.57593700 | -3.38794700 | -0.53770900 |
| H | -1.30251200 | -2.65903200 | 0.48455100  |
| H | -2.98975300 | -4.22275100 | -0.29774300 |

**TS-AB·4H<sub>2</sub>O**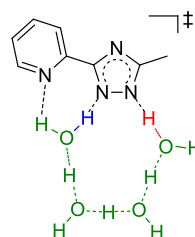

M06-2X/6-311+G(d,p)/SMD(DMSO)

Imaginary frequency: -525.2808 cm<sup>-1</sup>

Cartesian coordinates

| ATOM | X           | Y           | Z           |
|------|-------------|-------------|-------------|
| C    | 0.59358500  | 2.51831000  | 0.03848100  |
| C    | -0.77025700 | 0.92530600  | -0.05590200 |
| N    | 0.41147800  | 0.41203500  | -0.38066100 |
| H    | 0.72272500  | -1.18225600 | -0.70165700 |
| N    | 1.28977300  | 1.43821300  | -0.31894400 |
| N    | -0.70926800 | 2.24551600  | 0.21226900  |
| O    | 0.71411600  | -2.18942700 | -0.77756100 |
| H    | -0.20149800 | -2.35624800 | -0.50061100 |
| O    | 3.76009600  | 0.69113200  | -0.49620500 |
| H    | 2.78686300  | 1.04540200  | -0.45976200 |
| H    | 4.07312700  | 0.74871500  | -1.40569600 |
| C    | -2.01875000 | 0.13742800  | 0.00546100  |
| C    | -3.23843600 | 0.78595000  | 0.21273000  |
| C    | -4.39905300 | 0.02881300  | 0.27250000  |
| H    | -3.26084800 | 1.86239400  | 0.32143200  |
| C    | -3.05599100 | -1.90912700 | -0.07885100 |
| C    | -4.31237000 | -1.35039000 | 0.12332200  |
| H    | -5.35759300 | 0.50943700  | 0.43145100  |
| H    | -2.94595900 | -2.98273300 | -0.19823600 |
| H    | -5.19041700 | -1.98248600 | 0.16201500  |
| N    | -1.93124700 | -1.19367600 | -0.13605100 |
| C    | 1.20697200  | 3.86550600  | 0.22578100  |
| H    | 1.05640000  | 4.21920800  | 1.24789600  |
| H    | 2.27810700  | 3.82313200  | 0.02515900  |
| H    | 0.75372700  | 4.59361900  | -0.45030500 |
| H    | 4.04938600  | -0.48951100 | 0.18178400  |
| O    | 4.27068600  | -1.38725000 | 0.70500400  |

H 4.47627600 -1.18834300 1.62797100  
H 3.47663200 -2.24380100 0.58992200  
O 2.63741300 -3.11771300 0.45377100  
H 1.78224100 -2.77353900 -0.05794800  
H 2.98299400 -3.90233200 0.00910100

#### TS-rot-9b-A

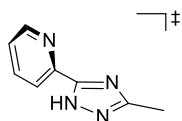

M06-2X/6-311+G(d,p)/SMD(DMSO)

Imaginary frequency: -63.3261 cm<sup>-1</sup>

Cartesian coordinates

| ATOM | X           | Y           | Z           |
|------|-------------|-------------|-------------|
| C    | 2.63107200  | 0.01422200  | 0.26933100  |
| C    | 0.57824000  | -0.00118800 | -0.21567700 |
| N    | 1.16708700  | -0.06641300 | -1.39114000 |
| N    | 2.47292400  | -0.05546200 | -1.05904700 |
| N    | 1.43390500  | 0.05554200  | 0.83902400  |
| C    | 3.95089400  | 0.02972800  | 0.95384800  |
| H    | 3.96639000  | 0.81507400  | 1.70983900  |
| H    | 4.75319900  | 0.20513300  | 0.23731500  |
| H    | 4.12817700  | -0.92595600 | 1.45084400  |
| C    | -0.90206300 | 0.00605400  | -0.06540700 |
| C    | -1.60189100 | 1.20908000  | -0.03221800 |
| C    | -2.98280000 | 1.16912600  | 0.11890100  |
| H    | -1.07210800 | 2.14928800  | -0.12576500 |
| C    | -2.81993500 | -1.21268900 | 0.18873000  |
| C    | -3.60631500 | -0.06615900 | 0.23253300  |
| H    | -3.55880200 | 2.08672500  | 0.14664800  |
| H    | -3.27525700 | -2.19418400 | 0.27411200  |
| H    | -4.67934600 | -0.14806900 | 0.35270400  |
| N    | -1.49342000 | -1.18808000 | 0.04360300  |
| H    | 3.19105400  | -0.09616700 | -1.77301600 |

#### TS-rot-9b-B

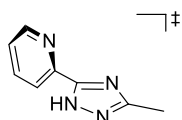

M06-2X/6-311+G(d,p)/SMD(DMSO)

Imaginary frequency: -69.8957 cm<sup>-1</sup>

Cartesian coordinates

| ATOM | X           | Y           | Z           |
|------|-------------|-------------|-------------|
| C    | -2.66982700 | -0.02434900 | -0.20057200 |
| C    | -0.58843200 | 0.00558800  | 0.14954900  |
| N    | -1.23930300 | 0.12326600  | 1.31251300  |
| H    | -0.85138800 | 0.21243600  | 2.24449000  |
| N    | -2.57149400 | 0.10550400  | 1.10854300  |
| N    | -1.46349100 | -0.09126400 | -0.83549800 |
| C    | -3.97187100 | -0.08691900 | -0.92089600 |
| H    | -4.79665900 | -0.00303800 | -0.21389000 |
| H    | -4.06379100 | -1.02989100 | -1.46315700 |
| H    | -4.04183600 | 0.72567500  | -1.64665000 |
| C    | 0.89287800  | 0.00250300  | 0.02635200  |
| C    | 1.58148300  | 1.20091700  | -0.13091800 |
| C    | 2.96519100  | 1.15231300  | -0.25579000 |
| H    | 1.04344400  | 2.14048800  | -0.15662700 |
| C    | 2.81606100  | -1.22438900 | -0.05390700 |
| C    | 3.59598800  | -0.08330700 | -0.21655600 |
| H    | 3.53640500  | 2.06453400  | -0.38156700 |
| H    | 3.27793600  | -2.20564000 | -0.01852600 |
| H    | 4.67120700  | -0.17083300 | -0.30973600 |

N 1.48798200 -1.19291600 0.06617000

#### TS-rot-9b-C

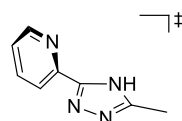

M06-2X/6-311+G(d,p)/SMD(DMSO)

Imaginary frequency: -63.1629 cm<sup>-1</sup>

Cartesian coordinates

| ATOM | X           | Y           | Z           |
|------|-------------|-------------|-------------|
| C    | 2.69950200  | 0.02160600  | 0.14502700  |
| C    | 0.57161700  | -0.04077900 | -0.28184300 |
| N    | 1.20223900  | -0.25908500 | -1.40416400 |
| N    | 2.55048200  | -0.22116300 | -1.13330300 |
| N    | 1.47195800  | 0.14415400  | 0.71920500  |
| C    | 3.98187700  | 0.14939400  | 0.88374300  |
| H    | 4.80806600  | -0.02768800 | 0.19657500  |
| H    | 4.03064500  | -0.57814900 | 1.69601000  |
| H    | 4.08156300  | 1.14881900  | 1.31165600  |
| C    | -0.90176200 | -0.00488200 | -0.09405500 |
| C    | -1.59384300 | 1.19933000  | -0.17782900 |
| C    | -2.97285300 | 1.18079600  | -0.00221400 |
| H    | -1.06298600 | 2.12190000  | -0.37821000 |
| C    | -2.81536900 | -1.18130800 | 0.32146600  |
| C    | -3.59722800 | -0.03215000 | 0.25177200  |
| H    | -3.54550900 | 2.09863700  | -0.06444300 |
| H    | -3.27206600 | -2.14539500 | 0.52061900  |
| H    | -4.66853600 | -0.09569200 | 0.39576400  |
| N    | -1.49219800 | -1.17842000 | 0.15396800  |
| H    | 1.26980500  | 0.32711200  | 1.69568900  |

#### 9b-A·2H<sub>2</sub>O(H<sub>2</sub>O)

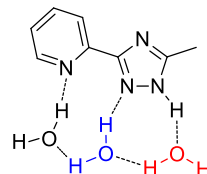

M06-2X/6-311+G(d,p)/SMD(DMSO)

Cartesian coordinates

| ATOM | X           | Y           | Z           |
|------|-------------|-------------|-------------|
| C    | -1.85595500 | -1.91021200 | 0.18496200  |
| C    | -0.03842900 | -0.85310100 | 0.00940800  |
| N    | -0.95996600 | 0.08012200  | -0.13762600 |
| H    | -1.19420700 | 1.89299500  | -0.76328600 |
| N    | -2.10666800 | -0.61064600 | -0.02073900 |
| N    | -0.54243300 | -2.09794100 | 0.20550300  |
| H    | -3.19415600 | 2.18793100  | -0.43446200 |
| O    | -1.53545400 | 2.80299500  | -0.83011700 |
| H    | -0.99194800 | 3.25437800  | -0.16533500 |
| O    | -3.89833000 | 1.54500800  | -0.22031300 |
| H    | -2.99675100 | -0.10628000 | -0.08840800 |
| H    | -4.64798200 | 1.76292500  | -0.78262700 |
| C    | 1.40773900  | -0.56232900 | -0.05091500 |
| C    | 2.31948600  | -1.59574500 | -0.25466500 |
| C    | 3.67127200  | -1.28575400 | -0.32437600 |
| H    | 1.96575500  | -2.61299300 | -0.36210800 |
| C    | 3.08451800  | 1.00041100  | 0.02247400  |
| C    | 4.06607200  | 0.03870700  | -0.18826600 |
| H    | 4.40367600  | -2.06801400 | -0.48578700 |
| H    | 3.35280400  | 2.04506800  | 0.14595900  |
| H    | 5.10804600  | 0.32786200  | -0.23744000 |
| N    | 1.78357800  | 0.71494900  | 0.09340300  |

|   |             |             |             |
|---|-------------|-------------|-------------|
| C | -2.91435800 | -2.94018500 | 0.35787000  |
| H | -2.79776500 | -3.44241300 | 1.31914900  |
| H | -3.90160500 | -2.48034600 | 0.31538400  |
| H | -2.84086200 | -3.69170000 | -0.42973100 |
| H | 0.86349100  | 2.23823100  | 0.72737000  |
| O | 0.52609300  | 3.11120000  | 1.01808800  |
| H | 0.46938700  | 3.06258900  | 1.97730800  |

### 9b-B·2H<sub>2</sub>O(H<sub>2</sub>O)

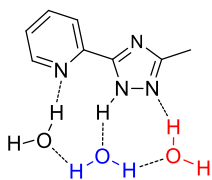

M06-2X/6-311+G(d,p)/SMD(DMSO)

Cartesian coordinates

| ATOM | X           | Y           | Z           |
|------|-------------|-------------|-------------|
| C    | -1.84850600 | -1.86550800 | 0.15867300  |
| C    | 0.01433100  | -0.89127700 | -0.01938100 |
| N    | -0.95900300 | -0.00942400 | -0.26459000 |
| H    | -0.92197800 | 0.98240400  | -0.54802800 |
| N    | -2.15610900 | -0.61704700 | -0.15380600 |
| N    | -0.51020000 | -2.07917500 | 0.24877000  |
| H    | -2.43321000 | 2.54901600  | -0.62603700 |
| O    | -1.49658700 | 2.66009000  | -0.85999500 |
| H    | -1.05174200 | 3.05333200  | -0.09175800 |
| O    | -3.98147900 | 1.58065900  | -0.16631600 |
| H    | -3.57475500 | 0.69457300  | -0.17550000 |
| H    | -4.78046700 | 1.51778200  | -0.69912000 |
| C    | 1.44649100  | -0.55487400 | -0.06211900 |
| C    | 2.39858400  | -1.56105800 | -0.19104200 |
| C    | 3.73737900  | -1.19645500 | -0.24796100 |
| H    | 2.08653400  | -2.59579500 | -0.25234900 |
| C    | 3.04950800  | 1.08187900  | -0.04244800 |
| C    | 4.07229400  | 0.14957000  | -0.17844500 |
| H    | 4.50605600  | -1.95334900 | -0.35014300 |
| H    | 3.27251800  | 2.14164400  | 0.02825200  |
| H    | 5.10237500  | 0.47904800  | -0.22268200 |
| N    | 1.76032900  | 0.74443600  | 0.01899100  |
| C    | -2.87329400 | -2.91969600 | 0.39455500  |
| H    | -2.78349100 | -3.31708000 | 1.40735200  |
| H    | -3.87273500 | -2.50542700 | 0.26430700  |
| H    | -2.73866500 | -3.74739100 | -0.30418400 |
| H    | 0.81533500  | 2.19252400  | 0.79916600  |
| O    | 0.36864900  | 2.99495100  | 1.13427100  |
| H    | 0.32371700  | 2.89609600  | 2.09049600  |

### TS-AB·2H<sub>2</sub>O(H<sub>2</sub>O)

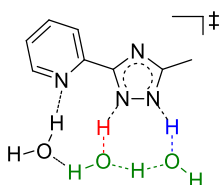

M06-2X/6-311+G(d,p)/SMD(DMSO)

Imaginary frequency: -894.0984 cm<sup>-1</sup>

Cartesian coordinates

| ATOM | X           | Y           | Z           |
|------|-------------|-------------|-------------|
| C    | -1.88922100 | -1.79483000 | 0.17356600  |
| C    | -0.03193000 | -0.83006600 | -0.02187500 |
| N    | -0.94581500 | 0.10477000  | -0.23689400 |
| H    | -1.15912400 | 1.62293100  | -0.65199900 |
| N    | -2.14396700 | -0.51684700 | -0.10480600 |

|   |             |             |             |
|---|-------------|-------------|-------------|
| N | -0.57001900 | -2.03904200 | 0.23025900  |
| H | -2.74092900 | 2.14690100  | -0.44497900 |
| O | -1.63085800 | 2.53563700  | -0.74012900 |
| H | -1.15871400 | 3.06359700  | -0.06481100 |
| O | -3.68115000 | 1.45579200  | -0.16868600 |
| H | -3.20199300 | 0.48069000  | -0.14463900 |
| H | -4.37918200 | 1.47845800  | -0.83633700 |
| C | 1.41605200  | -0.55238400 | -0.05797500 |
| C | 2.33124100  | -1.59326000 | -0.21015400 |
| C | 3.68513900  | -1.29105300 | -0.25334600 |
| H | 1.97528500  | -2.61162500 | -0.29938500 |
| C | 3.10181000  | 1.00609300  | 0.01350600  |
| C | 4.08366700  | 0.03573500  | -0.14488400 |
| H | 4.41795600  | -2.08038400 | -0.37436900 |
| H | 3.37170100  | 2.05290900  | 0.11395800  |
| H | 5.12793700  | 0.31892600  | -0.17612400 |
| N | 1.79747100  | 0.72777000  | 0.06123600  |
| C | -2.95725200 | -2.81271000 | 0.39183900  |
| H | -2.87690800 | -3.24889800 | 1.38935900  |
| H | -3.93991700 | -2.35176100 | 0.28864500  |
| H | -2.87180100 | -3.62205100 | -0.33593300 |
| H | 0.83439300  | 2.22263000  | 0.65156500  |
| O | 0.40006000  | 3.06509500  | 0.91199000  |
| H | 0.49616200  | 3.13376400  | 1.86701700  |

### 9b-A·3H<sub>2</sub>O(H<sub>2</sub>O)

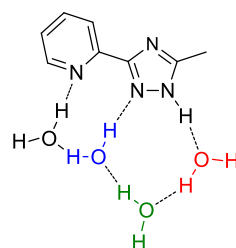

M06-2X/6-311+G(d,p)/SMD(DMSO)

Cartesian coordinates

| ATOM | X           | Y           | Z           |
|------|-------------|-------------|-------------|
| C    | -1.06394100 | 2.40525800  | 0.15495700  |
| C    | 0.48579600  | 0.97948300  | 0.03938800  |
| N    | -0.61295400 | 0.24755200  | 0.09161900  |
| N    | -1.58674600 | 1.17262800  | 0.16331400  |
| N    | 0.25747800  | 2.31623600  | 0.07445200  |
| O    | 0.40970700  | -2.98485700 | 1.30825900  |
| H    | 0.86962800  | -2.17674700 | 0.99476700  |
| O    | -4.20111800 | 0.19994300  | 0.21762600  |
| H    | -2.57680700 | 0.88364300  | 0.21407300  |
| C    | 1.84003600  | 0.39992800  | -0.06115700 |
| C    | 2.91176300  | 1.20564200  | -0.44064500 |
| C    | 4.17199700  | 0.63236900  | -0.54388600 |
| H    | 2.74762500  | 2.25375500  | -0.65414500 |
| C    | 3.19535900  | -1.44256400 | 0.11203800  |
| C    | 4.32112300  | -0.72033400 | -0.26636100 |
| H    | 5.02361700  | 1.23380900  | -0.83960200 |
| H    | 3.27045800  | -2.49964000 | 0.34758100  |
| H    | 5.28332000  | -1.21137300 | -0.33519400 |
| N    | 1.98022200  | -0.90230700 | 0.21647200  |
| C    | -1.87012500 | 3.65209400  | 0.23003100  |
| H    | -1.65374600 | 4.28956700  | -0.62826100 |
| H    | -2.93525000 | 3.42106600  | 0.24054800  |
| H    | -1.61915200 | 4.20539600  | 1.13666300  |
| H    | -4.26745100 | -0.70553200 | -0.15321500 |
| O    | -4.08956200 | -2.31945400 | -0.77910600 |
| H    | -3.11674700 | -2.46154200 | -0.79042200 |
| O    | -1.39920500 | -2.41451800 | -0.71350100 |
| H    | -0.92337200 | -2.90818600 | -0.02521500 |
| H    | -1.11441400 | -1.49974600 | -0.53209800 |



|   |             |             |             |
|---|-------------|-------------|-------------|
| H | -4.74877100 | 0.20935000  | 1.00910700  |
| H | -4.41246200 | -2.56654700 | -1.65115500 |
| H | 0.19689300  | -2.82621200 | 2.23314800  |

### 9b-B·3H<sub>2</sub>O(H<sub>2</sub>O)

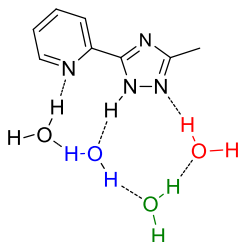

M06-2X/6-311+G(d,p)/SMD(DMSO)

Cartesian coordinates

| ATOM | X           | Y           | Z           |
|------|-------------|-------------|-------------|
| C    | -1.09343600 | 2.32651300  | 0.19918900  |
| C    | 0.53200800  | 0.99744400  | -0.00053400 |
| N    | -0.60436800 | 0.30200300  | -0.10593000 |
| N    | -1.65133500 | 1.14012300  | 0.01791100  |
| N    | 0.26253500  | 2.28243600  | 0.19131900  |
| O    | 0.33948000  | -2.79124700 | 1.53363000  |
| H    | 0.87629100  | -2.08062000 | 1.12882300  |
| O    | -4.32710600 | 0.22207500  | -0.09668100 |
| H    | -3.41842200 | 0.58476500  | -0.03860900 |
| C    | 1.87450300  | 0.40167000  | -0.09908500 |
| C    | 2.96457400  | 1.19873900  | -0.43569000 |
| C    | 4.21208600  | 0.59817300  | -0.54060900 |
| H    | 2.82468700  | 2.25670900  | -0.61685900 |
| C    | 3.17779900  | -1.47788500 | 0.02910800  |
| C    | 4.32351600  | -0.76690400 | -0.30966500 |
| H    | 5.08240200  | 1.18781900  | -0.80334100 |
| H    | 3.22757800  | -2.54308000 | 0.23043700  |
| H    | 5.27505800  | -1.27753600 | -0.38348500 |
| N    | 1.97427800  | -0.91202200 | 0.13741400  |
| C    | -1.87774900 | 3.57266100  | 0.41932400  |
| H    | -1.57616800 | 4.34235100  | -0.29291700 |
| H    | -2.94288500 | 3.37463300  | 0.30003000  |
| H    | -1.70069800 | 3.95659100  | 1.42613000  |
| H    | -4.27438100 | -1.50266600 | -0.46275000 |
| O    | -4.05873800 | -2.43785600 | -0.65189500 |
| H    | -2.26375000 | -2.45828200 | -0.64611200 |
| O    | -1.30048200 | -2.30715400 | -0.61718400 |
| H    | -0.95449000 | -2.74373200 | 0.17795500  |
| H    | -0.77219500 | -0.70171100 | -0.32035100 |
| H    | -4.79136300 | 0.54038300  | 0.68425300  |
| H    | -4.56509900 | -2.67932400 | -1.43364400 |
| H    | 0.20063100  | -2.53310100 | 2.45025700  |

### TS-AB·3H<sub>2</sub>O(H<sub>2</sub>O)

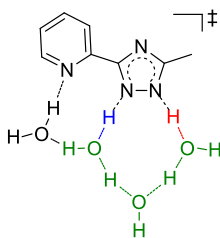

M06-2X/6-311+G(d,p)/SMD(DMSO)

Imaginary frequency: -443.4829 cm<sup>-1</sup>

Cartesian coordinates

| ATOM | X           | Y          | Z          |
|------|-------------|------------|------------|
| C    | -1.23684200 | 2.26974700 | 0.18607600 |
| C    | 0.39967000  | 0.96449000 | 0.02626900 |

|   |             |             |             |
|---|-------------|-------------|-------------|
| N | -0.67918200 | 0.19458800  | -0.05250400 |
| N | -1.73298500 | 1.03977000  | 0.05108200  |
| N | 0.10418300  | 2.27148600  | 0.17198900  |
| O | 0.50662800  | -2.98505300 | 1.22630000  |
| H | 0.97187900  | -2.16759500 | 0.93606300  |
| O | -4.05607600 | 0.01726500  | 0.01123500  |
| H | -3.09628700 | 0.49866600  | 0.04729500  |
| C | 1.78132700  | 0.45404600  | -0.06307800 |
| C | 2.82291300  | 1.32395700  | -0.38975900 |
| C | 4.11257100  | 0.82140200  | -0.48197100 |
| H | 2.60979000  | 2.36914100  | -0.57202100 |
| C | 3.23326200  | -1.32243800 | 0.07581900  |
| C | 4.32764000  | -0.53186900 | -0.24881400 |
| H | 4.93779900  | 1.47643600  | -0.73617900 |
| H | 3.35808500  | -2.38207800 | 0.27683000  |
| H | 5.31584400  | -0.96917000 | -0.31069900 |
| N | 1.98820900  | -0.84923500 | 0.17191700  |
| C | -2.08318900 | 3.48639900  | 0.35248100  |
| H | -1.78849200 | 4.25602200  | -0.36299600 |
| H | -3.13479200 | 3.24464900  | 0.19484800  |
| H | -1.96854700 | 3.90037000  | 1.35682200  |
| H | -3.94033900 | -1.20934300 | -0.31313200 |
| O | -3.71382700 | -2.28206900 | -0.59786100 |
| H | -2.61771800 | -2.37514500 | -0.63770600 |
| O | -1.29646400 | -2.32142500 | -0.65881100 |
| H | -0.81839800 | -2.82783100 | 0.02840200  |
| H | -1.00536900 | -1.36823700 | -0.47715000 |
| H | -4.50575100 | 0.14901600  | 0.85467400  |
| H | -4.11217000 | -2.51911000 | -1.44587000 |
| H | 0.36668000  | -2.89619500 | 2.17440200  |

### 9b-B·DMSO'

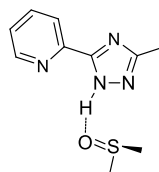

M06-2X/6-311+G(d,p)/SMD(DMSO)

Cartesian coordinates

| ATOM | X           | Y           | Z           |
|------|-------------|-------------|-------------|
| C    | -1.23868100 | 0.84253500  | -0.06052500 |
| N    | -1.43667300 | 2.15450800  | -0.04753200 |
| N    | 0.07002200  | 0.58230700  | -0.12961500 |
| C    | -2.26933500 | -0.20555200 | 0.00348400  |
| C    | -3.61653100 | 0.13238200  | 0.10701900  |
| C    | -4.54746800 | -0.89682500 | 0.15677400  |
| H    | -3.91393300 | 1.17263200  | 0.14570500  |
| C    | -2.73083200 | -2.44276300 | 0.00300000  |
| C    | -4.09995700 | -2.21114200 | 0.10380800  |
| H    | -5.60529700 | -0.67487300 | 0.23548600  |
| H    | -2.34663300 | -3.45681500 | -0.04021100 |
| H    | -4.79036200 | -3.04446600 | 0.13877900  |
| N    | -1.82680300 | -1.46605200 | -0.04804300 |
| C    | -0.17811500 | 2.66420600  | -0.11588500 |
| C    | 0.11453700  | 4.12481900  | -0.12526300 |
| H    | -0.23829300 | 4.59136800  | 0.79683900  |
| H    | 1.18758600  | 4.29199700  | -0.21541200 |
| H    | -0.39127600 | 4.61161000  | -0.96128100 |
| N    | 0.76353100  | 1.73538000  | -0.16681900 |
| H    | 0.58912900  | -0.31261600 | -0.17128000 |
| S    | 3.34625500  | -0.67037500 | -0.34227200 |
| O    | 1.97081000  | -1.35287200 | -0.25091100 |
| C    | 4.53206800  | -2.02146600 | -0.30920200 |
| H    | 4.42443400  | -2.57222700 | -1.24316500 |
| H    | 5.53798400  | -1.60544100 | -0.23563500 |
| H    | 4.30760500  | -2.66221900 | 0.54448700  |

|   |            |             |            |
|---|------------|-------------|------------|
| C | 3.66491700 | -0.01647300 | 1.30263800 |
| H | 4.67869600 | 0.38568300  | 1.33411800 |
| H | 2.94198300 | 0.78165100  | 1.47323400 |
| H | 3.53766300 | -0.81864000 | 2.03094500 |

### TS1-BC·DMSO

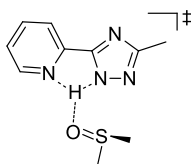

M06-2X/6-311+G(d,p)/SMD(DMSO)

Imaginary frequency: -1522.7992 cm<sup>-1</sup>

Cartesian coordinates

| ATOM | X           | Y           | Z           |
|------|-------------|-------------|-------------|
| C    | -1.35106100 | 1.08372600  | -0.02688100 |
| N    | -1.64166500 | 2.37912000  | -0.06473500 |
| N    | -0.04458200 | 0.84671600  | -0.02543200 |
| C    | -2.11503900 | -0.17640400 | 0.00453700  |
| C    | -3.47508200 | -0.41641300 | 0.00947300  |
| C    | -3.88659400 | -1.74951600 | 0.03943400  |
| H    | -4.18190600 | 0.40300600  | -0.00982400 |
| C    | -1.59382000 | -2.44524100 | 0.05572700  |
| C    | -2.94730300 | -2.77380800 | 0.06277400  |
| H    | -4.94426900 | -1.98528700 | 0.04405500  |
| H    | -0.80576500 | -3.18881000 | 0.07158600  |
| H    | -3.24975200 | -3.81223400 | 0.08553700  |
| N    | -1.21488100 | -1.17689200 | 0.02834300  |
| C    | -0.39771600 | 2.93123500  | -0.08908900 |
| C    | -0.15521700 | 4.40189100  | -0.14488300 |
| H    | -0.63573000 | 4.90628200  | 0.69597300  |
| H    | 0.91513700  | 4.60544300  | -0.11188100 |
| H    | -0.56282400 | 4.82628300  | -1.06518500 |
| N    | 0.58975300  | 2.03425200  | -0.06591300 |
| H    | -0.08159600 | -0.45779900 | 0.00666300  |
| S    | 2.76125900  | -0.70814300 | -0.34586600 |
| O    | 1.65974600  | -1.72051900 | -0.02727000 |
| C    | 4.28483900  | -1.66327600 | -0.46625000 |
| H    | 4.20801400  | -2.28919400 | -1.35491200 |
| H    | 5.12637200  | -0.97637800 | -0.56916400 |
| H    | 4.38689000  | -2.27872900 | 0.42848000  |
| C    | 3.13150300  | 0.12366800  | 1.20830000  |
| H    | 3.95842000  | 0.81835100  | 1.05146400  |
| H    | 2.23541600  | 0.67263000  | 1.49612400  |
| H    | 3.38604400  | -0.62667700 | 1.95842300  |

### I1·DMSO

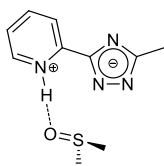

M06-2X/6-311+G(d,p)/SMD(DMSO)

Cartesian coordinates

| ATOM | X           | Y           | Z           |
|------|-------------|-------------|-------------|
| C    | -1.23570700 | 0.78186800  | -0.03293900 |
| N    | -2.08465800 | 1.82911000  | -0.06007200 |
| N    | 0.04830600  | 1.12822000  | -0.03694800 |
| C    | -1.66435700 | -0.60982000 | 0.00087000  |
| C    | -3.00298100 | -0.99735200 | -0.02779600 |
| C    | -3.32305400 | -2.34353500 | 0.00364300  |
| H    | -3.76584900 | -0.23226700 | -0.07616800 |
| C    | -1.00480500 | -2.87360400 | 0.09233100  |

|   |             |             |             |
|---|-------------|-------------|-------------|
| C | -2.31225800 | -3.30466600 | 0.06329200  |
| H | -4.36196400 | -2.65041300 | -0.01945200 |
| H | -0.15571000 | -3.54320000 | 0.13954500  |
| H | -2.53283900 | -4.36269700 | 0.08747800  |
| N | -0.71560200 | -1.56397400 | 0.06249700  |
| C | -1.22642700 | 2.86188600  | -0.07974400 |
| C | -1.64855700 | 4.29491100  | -0.10365900 |
| H | -2.21611400 | 4.55049700  | 0.79435600  |
| H | -0.77255600 | 4.94242400  | -0.15358100 |
| H | -2.28391200 | 4.50171700  | -0.96778600 |
| N | 0.05792900  | 2.47662400  | -0.06722400 |
| H | 0.32605100  | -1.30706700 | 0.09507500  |
| S | 2.74308200  | -0.23438200 | -0.36434100 |
| O | 1.87913300  | -1.38760900 | 0.19502300  |
| C | 4.37805200  | -0.97193200 | -0.49074600 |
| H | 4.33983500  | -1.72549700 | -1.27687900 |
| H | 5.09214000  | -0.19197700 | -0.75937900 |
| H | 4.63652600  | -1.42689100 | 0.46582300  |
| C | 3.07729000  | 0.84011100  | 1.03581600  |
| H | 3.80912400  | 1.58891800  | 0.72807800  |
| H | 2.13597400  | 1.31710500  | 1.30133600  |
| H | 3.46191400  | 0.23328300  | 1.85665700  |

### TS2-rot·DMSO

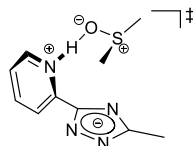

M06-2X/6-311+G(d,p)/SMD(DMSO)

Imaginary frequency: -59.2259 cm<sup>-1</sup>

Cartesian coordinates

| ATOM | X           | Y           | Z           |
|------|-------------|-------------|-------------|
| C    | -0.52580500 | 1.17127900  | -0.15588900 |
| N    | 0.14729600  | 1.61323800  | 0.92207400  |
| N    | 0.06091200  | 1.43448100  | -1.31556300 |
| C    | -1.80054500 | 0.42514200  | -0.05555100 |
| C    | -3.05245300 | 0.98412800  | -0.25752400 |
| C    | -4.18354500 | 0.18790000  | -0.11357600 |
| H    | -3.12933700 | 2.03198800  | -0.51541200 |
| C    | -2.78372800 | -1.66886200 | 0.40820000  |
| C    | -4.05223300 | -1.15358100 | 0.22996000  |
| H    | -5.16735000 | 0.61546800  | -0.26636700 |
| H    | -2.58854100 | -2.70291000 | 0.66061700  |
| H    | -4.91399500 | -1.79519900 | 0.35176900  |
| N    | -1.71305200 | -0.87926200 | 0.26294900  |
| C    | 1.21725700  | 2.19618500  | 0.33883000  |
| C    | 2.32228500  | 2.85041000  | 1.10267100  |
| H    | 1.93667000  | 3.62645400  | 1.76753900  |
| H    | 3.03447900  | 3.30563800  | 0.41340300  |
| H    | 2.85593200  | 2.12174700  | 1.71865400  |
| N    | 1.20315900  | 2.10267900  | -0.98895900 |
| H    | -0.72571400 | -1.30098700 | 0.33394000  |
| S    | 1.97609000  | -1.15457400 | 0.13009200  |
| O    | 0.65083700  | -1.94797600 | 0.23196000  |
| C    | 3.22023300  | -2.34581100 | 0.63795300  |
| H    | 3.07338900  | -2.53789400 | 1.70031400  |
| H    | 4.20624100  | -1.90935400 | 0.47078600  |
| H    | 3.08860600  | -3.25901500 | 0.05688400  |
| C    | 2.36021700  | -1.10870700 | -1.62367100 |
| H    | 3.32662400  | -0.61761300 | -1.75043600 |
| H    | 1.57851400  | -0.51894200 | -2.10142900 |
| H    | 2.38206700  | -2.12883300 | -2.00933800 |

**I2-DMSO**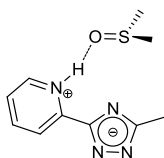

M06-2X/6-311+G(d,p)/SMD(DMSO)

Cartesian coordinates

| ATOM | X           | Y           | Z           |
|------|-------------|-------------|-------------|
| C    | -1.03558500 | 1.31080800  | -0.03541400 |
| N    | 0.30653700  | 1.19516100  | 0.01446800  |
| N    | -1.46557100 | 2.56629100  | -0.14181400 |
| C    | -1.93386500 | 0.16584100  | 0.00155900  |
| C    | -3.32443500 | 0.27129700  | -0.04850500 |
| C    | -4.09467900 | -0.87632500 | -0.00819300 |
| H    | -3.77155100 | 1.25343900  | -0.11887700 |
| C    | -2.11170900 | -2.18536300 | 0.12576500  |
| C    | -3.48552900 | -2.13080400 | 0.08302600  |
| H    | -5.17487200 | -0.80070400 | -0.04756900 |
| H    | -1.55007600 | -3.10807800 | 0.19095500  |
| H    | -4.06390400 | -3.04347000 | 0.11654400  |
| N    | -1.38219400 | -1.05864200 | 0.08516800  |
| C    | 0.68719500  | 2.47959200  | -0.07056200 |
| C    | 2.11225600  | 2.92794800  | -0.04192200 |
| H    | 2.72204300  | 2.33148000  | -0.72421200 |
| H    | 2.18172500  | 3.97580900  | -0.33646000 |
| H    | 2.53825800  | 2.82611100  | 0.95988000  |
| N    | -0.34938400 | 3.32509000  | -0.16426800 |
| H    | -0.32073800 | -1.18397600 | 0.11005400  |
| S    | 2.33278800  | -1.07192400 | -0.34530600 |
| O    | 1.10223600  | -1.85732800 | 0.15831600  |
| C    | 3.57894100  | -2.34720500 | -0.58273100 |
| H    | 3.26091500  | -2.96637600 | -1.42110300 |
| H    | 4.52856000  | -1.86413800 | -0.81927000 |
| H    | 3.65781500  | -2.94202600 | 0.32762300  |
| C    | 3.03865700  | -0.31164400 | 1.12224300  |
| H    | 3.95806000  | 0.20547800  | 0.84238900  |
| H    | 2.30006000  | 0.39640500  | 1.49243600  |
| H    | 3.23800800  | -1.09072600 | 1.85950100  |

**TS2-BC-DMSO**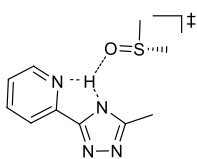

M06-2X/6-311+G(d,p)/SMD(DMSO)

Imaginary frequency: -1497.3696 cm<sup>-1</sup>

Cartesian coordinates

| ATOM | X           | Y           | Z           |
|------|-------------|-------------|-------------|
| C    | -1.51432600 | 1.33754500  | -0.01563900 |
| N    | -1.85813300 | 2.60137800  | -0.01632800 |
| N    | -0.17671300 | 1.14693800  | -0.07665300 |
| C    | -2.24096400 | 0.05768800  | 0.01561500  |
| C    | -3.59345300 | -0.22241300 | 0.08773100  |
| C    | -3.96369500 | -1.56598100 | 0.09378400  |
| H    | -4.32359300 | 0.57503400  | 0.13629600  |
| C    | -1.65523800 | -2.19504700 | -0.03927600 |
| C    | -2.99513500 | -2.56318400 | 0.03034200  |
| H    | -5.01231500 | -1.83375300 | 0.14861600  |
| H    | -0.84268300 | -2.90974100 | -0.09247300 |
| H    | -3.26804100 | -3.61008800 | 0.03354900  |
| N    | -1.31517300 | -0.91376600 | -0.04373200 |
| H    | -0.20789200 | -0.14232100 | -0.09574200 |

|   |             |             |             |
|---|-------------|-------------|-------------|
| S | 2.67846300  | -0.72576300 | -0.27569000 |
| O | 1.44581100  | -1.62825200 | -0.26498500 |
| C | 4.10090100  | -1.81605500 | -0.46900100 |
| H | 4.05218500  | -2.23907900 | -1.47209000 |
| H | 5.01366200  | -1.22821700 | -0.35795200 |
| H | 4.04710100  | -2.60374300 | 0.28372600  |
| C | 2.96090200  | -0.27304000 | 1.44548400  |
| H | 3.86292700  | 0.33679100  | 1.51704400  |
| H | 2.09224600  | 0.29910800  | 1.77311400  |
| H | 3.05908400  | -1.18514700 | 2.03640100  |
| C | 0.30967800  | 2.40693500  | -0.12254800 |
| N | -0.67881000 | 3.29445500  | -0.08506000 |
| C | 1.75036300  | 2.77524500  | -0.21288200 |
| H | 2.31384300  | 2.37730100  | 0.63357600  |
| H | 2.19622700  | 2.38757300  | -1.13071100 |
| H | 1.84295300  | 3.86131700  | -0.21167600 |

**9b-C-DMSO'**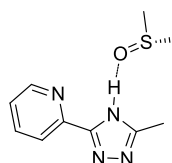

M06-2X/6-311+G(d,p)/SMD(DMSO)

Cartesian coordinates

| ATOM | X           | Y           | Z           |
|------|-------------|-------------|-------------|
| C    | -1.43188100 | 1.13229600  | -0.03253100 |
| N    | -1.75195500 | 2.38649200  | -0.24494700 |
| N    | -0.09018400 | 1.01931300  | 0.13897200  |
| C    | -2.36057200 | -0.00712100 | 0.01187500  |
| C    | -3.73096200 | 0.18521300  | -0.16359500 |
| C    | -4.55997000 | -0.92583100 | -0.11696800 |
| H    | -4.12359900 | 1.18010600  | -0.33057000 |
| C    | -2.61858800 | -2.26383300 | 0.26516700  |
| C    | -3.99665400 | -2.17848200 | 0.10038800  |
| H    | -5.62993700 | -0.81568800 | -0.24945400 |
| H    | -2.14387700 | -3.22459100 | 0.43739000  |
| H    | -4.60586100 | -3.07251900 | 0.14254200  |
| N    | -1.80857600 | -1.20519900 | 0.22429800  |
| H    | 0.49085600  | 0.17808900  | 0.31276500  |
| S    | 3.07241500  | -0.82053200 | -0.41320200 |
| O    | 1.90126200  | -0.78028400 | 0.58059500  |
| C    | 3.56313300  | -2.54804100 | -0.49352000 |
| H    | 2.75793700  | -3.09380500 | -0.98437400 |
| H    | 4.47839300  | -2.62542300 | -1.08237400 |
| H    | 3.71544100  | -2.91397600 | 0.52270400  |
| C    | 4.48892000  | -0.19885600 | 0.50288800  |
| H    | 5.38565900  | -0.32564200 | -0.10533800 |
| H    | 4.31419400  | 0.85980300  | 0.69357800  |
| H    | 4.56691700  | -0.75279000 | 1.43924300  |
| C    | 0.39564500  | 2.27912000  | 0.01912600  |
| N    | -0.59307100 | 3.11500400  | -0.21139600 |
| C    | 1.83775300  | 2.62686200  | 0.13183400  |
| H    | 2.26035900  | 2.22943600  | 1.05625000  |
| H    | 2.40318400  | 2.21964800  | -0.71013400 |
| H    | 1.94714500  | 3.71090400  | 0.12778200  |

**9b-C-DMSO**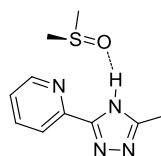

M06-2X/6-311+G(d,p)/SMD(DMSO)

Cartesian coordinates

| ATOM | X           | Y           | Z           |
|------|-------------|-------------|-------------|
| C    | 1.77864300  | 0.51662300  | 0.00004700  |
| N    | 2.94716700  | 1.11071500  | 0.05486400  |
| N    | 0.78492300  | 1.44023600  | -0.01378100 |
| C    | 1.53783100  | -0.93310900 | -0.04225300 |
| C    | 2.60183400  | -1.83517100 | -0.05376300 |
| C    | 2.31148800  | -3.19082700 | -0.09635800 |
| H    | 3.62168800  | -1.47264600 | -0.02928100 |
| C    | -0.00658400 | -2.61750600 | -0.11416900 |
| C    | 0.98119500  | -3.59555300 | -0.12928800 |
| H    | 3.11195700  | -3.92146000 | -0.10483900 |
| H    | -1.05666700 | -2.89687200 | -0.13677900 |
| H    | 0.71006700  | -4.64307100 | -0.16454200 |
| N    | 0.25589900  | -1.31110600 | -0.06862900 |
| H    | -0.24908300 | 1.27008600  | -0.04614300 |
| O    | -1.89001700 | 1.21845200  | -0.04973400 |
| S    | -2.62985900 | -0.10497000 | -0.31812000 |
| C    | -2.79902800 | -0.89118900 | 1.29086300  |
| H    | -3.39775100 | -1.79663000 | 1.18025700  |
| H    | -1.79537900 | -1.14109900 | 1.63225000  |
| H    | -3.27543000 | -0.18813500 | 1.97565200  |
| C    | -4.34753600 | 0.38364300  | -0.52830900 |
| H    | -4.64459300 | 1.00554300  | 0.31687400  |
| H    | -4.41780200 | 0.94282000  | -1.46086100 |
| H    | -4.96095900 | -0.51673100 | -0.58885200 |
| N    | 2.71530100  | 2.45955300  | 0.07819300  |
| C    | 1.41186600  | 2.63958100  | 0.03836200  |
| C    | 0.70491500  | 3.94813900  | 0.04087000  |
| H    | 0.09149300  | 4.05856400  | -0.85548800 |
| H    | 0.05103400  | 4.03500100  | 0.91087700  |
| H    | 1.43852300  | 4.75295400  | 0.06813400  |

**DMSO**

M06-2X/6-311+G(d,p)/SMD(DMSO)

Cartesian coordinates

| ATOM | X           | Y           | Z           |
|------|-------------|-------------|-------------|
| S    | 0.26356300  | 0.42155400  | 0.00000000  |
| O    | -1.12055000 | 1.05977900  | 0.00000000  |
| C    | 0.26356300  | -0.77211500 | 1.35090500  |
| H    | 1.19791000  | -1.33509800 | 1.33185400  |
| H    | 0.19027900  | -0.20993600 | 2.28155500  |
| H    | -0.59587300 | -1.43382400 | 1.23436900  |
| C    | 0.26356300  | -0.77211500 | -1.35090500 |
| H    | 0.19027900  | -0.20993600 | -2.28155500 |
| H    | 1.19791000  | -1.33509800 | -1.33185400 |
| H    | -0.59587300 | -1.43382400 | -1.23436900 |

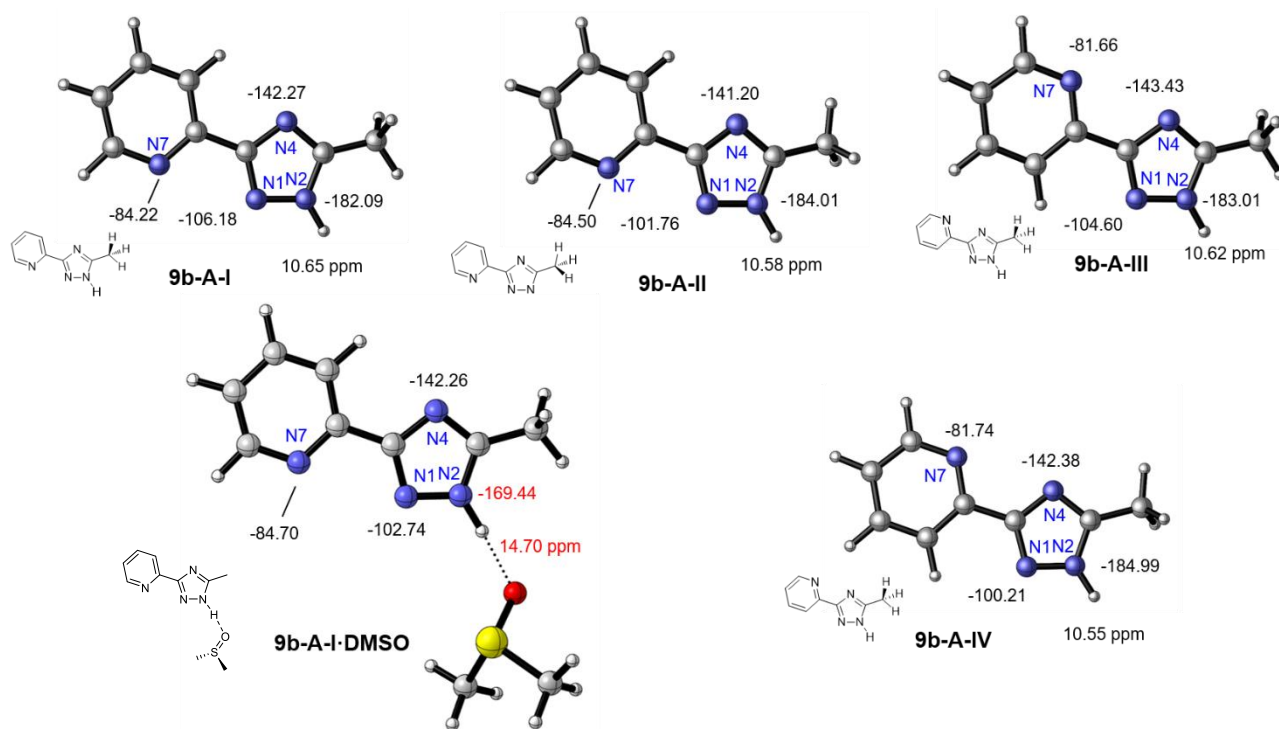

**Figure S44.** Computed  $^{15}\text{N}$  chemical shifts of **9b-A** at the level GIAO/B3LYP/6-311+G(2d,p)/SMD(DMSO).

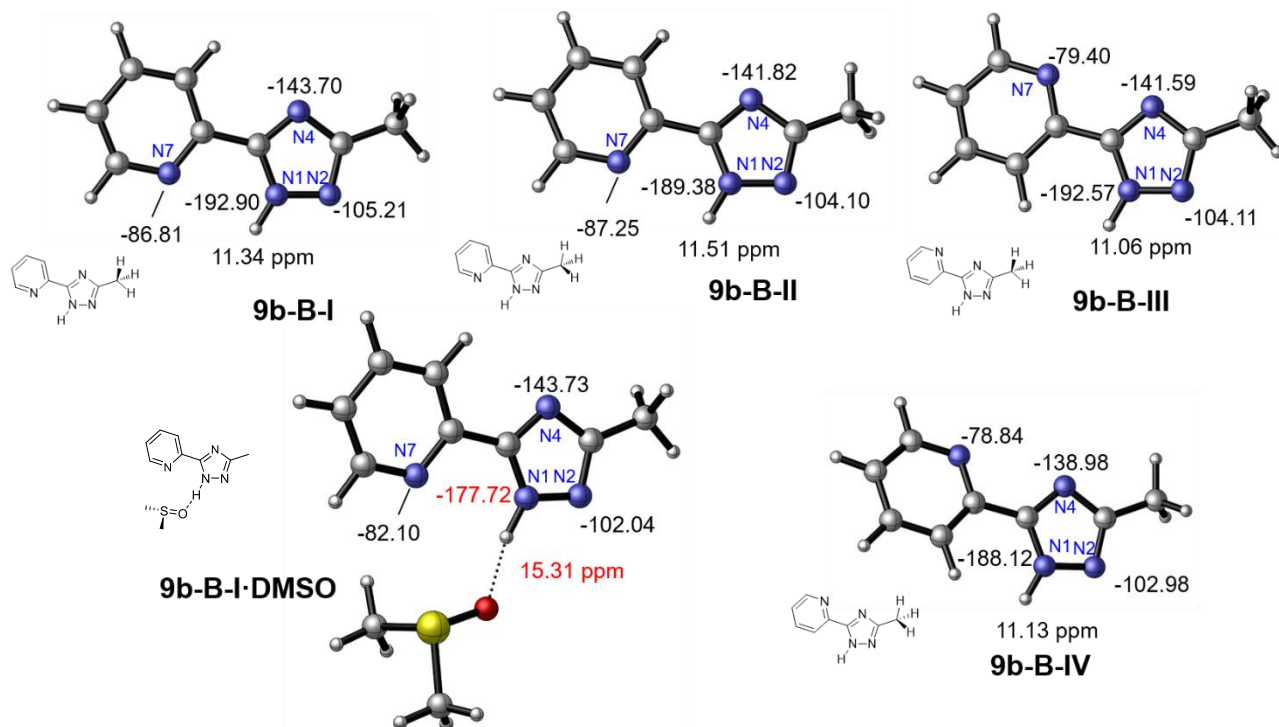

**Figure S45.** Computed  $^{15}\text{N}$  chemical shifts of **9b-B** at the level B3LYP/6-311+G(2d,p)/SMD(DMSO)/GIAO.

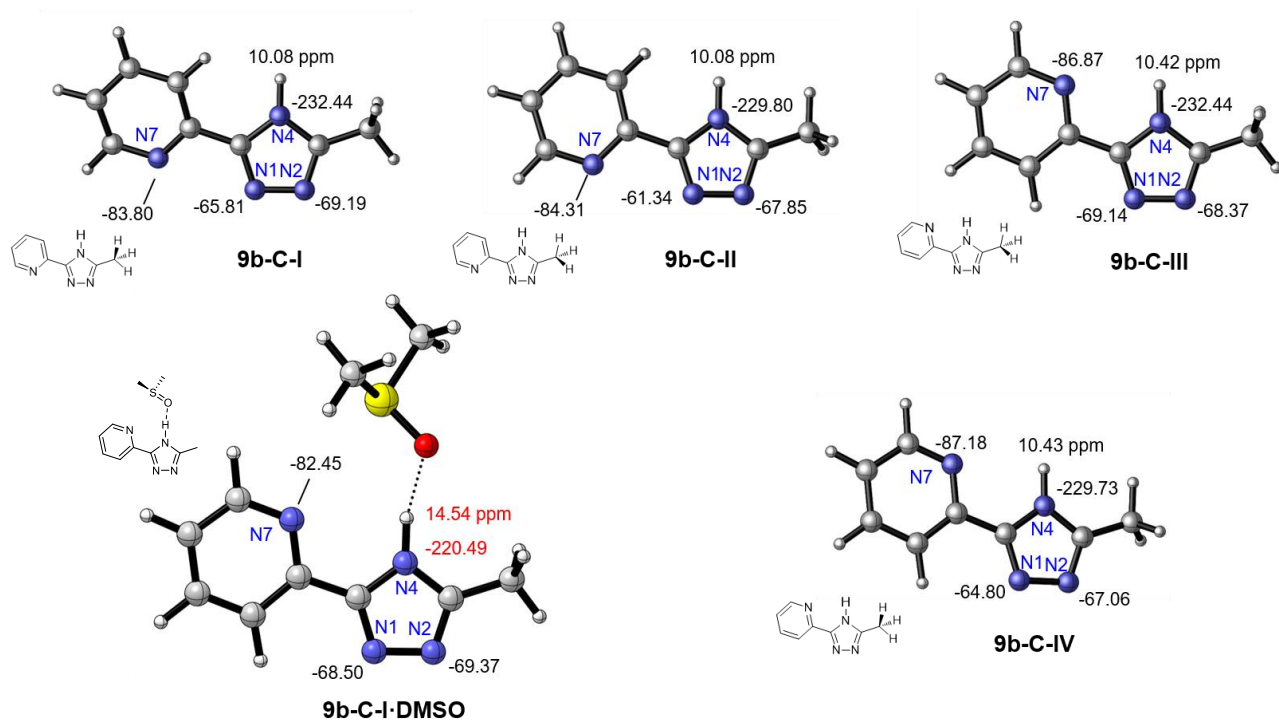

**Figure S46.** Computed  $^{15}\text{N}$  chemical shifts of **9b-C** at the level B3LYP/6-311+G(2d,p)/SMD(DMSO)/GIAO.
